# Supplementary material for: Cu/base co-catalyzed [3+3] cycloaddition for the synthesis of highly functionalized 4-fluoropyridines
Source: Royal Society of Chemistry journal article supplement (doi:10.1039/d1cc05412k), 2021-01-01
Supplement: d1cc05412k1.pdf [file d1cc05412k1.pdf]

*Supporting Information for:*

## **Cu/Base Co-catalyzed [3 + 3] Cycloaddition for the Synthesis of Highly Functionalized 4-Fluoropyridines**

Jinhuan Dong,<sup>‡<sup>a</sup></sup> Wanzhong Feng,<sup>‡<sup>b</sup></sup> Lei Wang,<sup>a</sup> Mei Li,<sup>a</sup> Zhe Chen,<sup>\*<sup>b</sup></sup> and Xianxiu Xu<sup>\*<sup>a</sup></sup>

<sup>a</sup>College of Chemistry, Chemical Engineering and Materials Science, Collaborative Innovation Center of Functionalized Probes for Chemical Imaging in Universities of Shandong, Key Laboratory of Molecular and Nano Probes, Ministry of Education, Shandong Provincial Key Laboratory of Clean Production of Fine Chemicals, Shandong Normal University, Jinan, 250014, P. R. China.

<sup>b</sup>School of Science, Jilin Institute of Chemical Technology, Jilin 132022, PR China.

E-mail: chenzhecz999@163.com; xuxx677@sdu.edu.cn.

### **table of contents**

|                                                                                                         |    |
|---------------------------------------------------------------------------------------------------------|----|
| 1. General Experimenta.....                                                                             | 2  |
| 2. Experimental Procedures .....                                                                        | 2  |
| 2.1 Synthesis of starting materials. ....                                                               | 2  |
| 2.2 Optimization of reaction conditions.....                                                            | 2  |
| 2.3 General procedure for the synthesis of 3-8 (3a as an example): .....                                | 4  |
| 2.4 General procedure for the synthesis of 9-15 .....                                                   | 4  |
| 3. Analytical Data of Compounds .....                                                                   | 8  |
| 4. Copies of <sup>1</sup> H NMR, <sup>19</sup> F NMR and <sup>13</sup> C NMR spectra of compounds ..... | 19 |
| 5. X-ray Crystallographic Data of compound 3k, 3p, 4c .....                                             | 67 |

## 1. General Experimenta

Unless otherwise indicated, all reagents and solvents were commercial and used without further purification. Melting points of all compounds were measured with a micro melting point apparatus. Flash column chromatography was carried on 300-400 mesh silica gel. All reactions were monitored by thin layer chromatography (TLC), which was performed on silica gel 60 (F254). NMR spectra were determined at 25 °C on 400 MHz for  $^1\text{H}$  NMR, and 100 MHz for  $^{13}\text{C}$  NMR. All chemical shifts were quoted in ppm and 0.0 ppm for TMS as an internal standard. High-resolution mass spectra (HRMS) were obtained using a Bruker microTOF II focus spectrometer (ESI).

## 2. Experimental Procedures

### 2.1 Synthesis of starting materials.

*gem*-Difluorocyclopropenes **1a-o**,<sup>1-4</sup> **1q-s**<sup>1-4</sup> and **1p**<sup>5</sup> were synthesized according to known literature procedure.

### References

- [1] F. Wang, W. Zhang, J. Zhu, H. Li, K.-W. Huang and J. Hu, *Chem. Commun.*, 2011, **47**, 2411–2413.  
[2] K. Sekine, A. Ushiyama, Y. Endo and K. Mikami, *J. Org. Chem.*, 2020, **85**, 7916–7924.  
[3] X. Deng, J. Lin, J. Zheng and J. Xiao, *Chem. Commun.*, 2015, **51**, 8805–8808  
[4] F. Wang, T. Luo, J. Hu, Y. Wang, H. S. Krishnan, P. V. Jog, S. K. Ganesh, G. K. S. Prakash and G. A. Olah, *Angew. Chem. Int. Ed.*, 2011, **50**, 7153–7157.  
[5] K. Yamani, H. Pierre, A. Archambeau, C. Meyer and J. Cossy, *Angew. Chem. Int. Ed.*, 2020, **59**, 18505-18509.

### 2.2 Optimization of reaction conditions

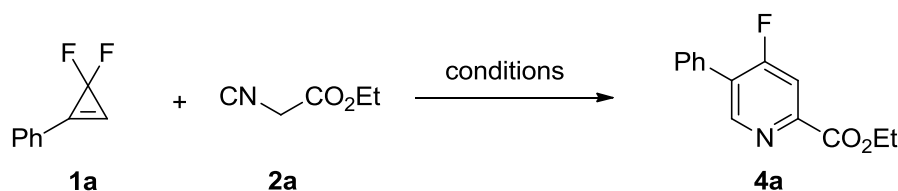

| Entry | <b>1a</b> : <b>2a</b> | Catalyst | Base | Solvent | Temp. (°C) | Time (h) | <b>4a</b> (%) <sup>b</sup> |
|-------|-----------------------|----------|------|---------|------------|----------|----------------------------|
|-------|-----------------------|----------|------|---------|------------|----------|----------------------------|

|                 |            |                                              |                                                   |                    |           |          |           |
|-----------------|------------|----------------------------------------------|---------------------------------------------------|--------------------|-----------|----------|-----------|
| 1               | 1:2        | -                                            | DBU<br>(30 mol%)                                  | 1,4-dioxane        | 25        | 12       | NR        |
| 2               | 1:2        | -                                            | Cs <sub>2</sub> CO <sub>3</sub><br>(30 mol%)      | 1,4-dioxane        | 25        | 12       | NR        |
| 3               | 1:2        | Cu <sub>2</sub> O<br>(30 mol%)               | -                                                 | 1,4-dioxane        | 25        | 35       | 53        |
| 4               | 1:2        | CuBr<br>(30 mol%)                            | Cs <sub>2</sub> CO <sub>3</sub><br>(30 mol%)      | 1,4-dioxane        | 25        | 5        | 73        |
| 5               | 1:2        | Cu <sub>2</sub> O<br>(30 mol%)               | Cs <sub>2</sub> CO <sub>3</sub><br>(30 mol%)      | 1,4-dioxane        | 25        | 26       | 65        |
| 6               | 1:2        | CuCl<br>(30 mol%)                            | Cs <sub>2</sub> CO <sub>3</sub><br>(30 mol%)      | 1,4-dioxane        | 25        | 7        | 55        |
| 7               | 1:2        | CuBr <sub>2</sub><br>(30 mol%)               | Cs <sub>2</sub> CO <sub>3</sub><br>(30 mol%)      | 1,4-dioxane        | 25        | 48       | 28        |
| 8               | 1:2        | CuI<br>(30 mol%)                             | Cs <sub>2</sub> CO <sub>3</sub><br>(30 mol%)      | 1,4-dioxane        | 25        | 22       | 64        |
| 9               | 1:2        | Ag <sub>2</sub> CO <sub>3</sub><br>(30 mol%) | Cs <sub>2</sub> CO <sub>3</sub><br>(30 mol%)      | 1,4-dioxane        | 25        | 48       | 44        |
| 10              | 1:2        | Ag <sub>2</sub> O<br>(30 mol%)               | Cs <sub>2</sub> CO <sub>3</sub><br>(30 mol%)      | 1,4-dioxane        | 25        | 48       | 51        |
| <b>11</b>       | <b>1:2</b> | <b>CuBr<br/>(10 mol%)</b>                    | <b>Cs<sub>2</sub>CO<sub>3</sub><br/>(30 mol%)</b> | <b>1,4-dioxane</b> | <b>25</b> | <b>6</b> | <b>79</b> |
| 12              | 1:2        | CuBr<br>(5 mol%)                             | Cs <sub>2</sub> CO <sub>3</sub><br>(30 mol%)      | 1,4-dioxane        | 25        | 24       | 32        |
| 13              | 1:2        | CuBr<br>(10 mol%)                            | Cs <sub>2</sub> CO <sub>3</sub><br>(10 mol%)      | 1,4-dioxane        | 25        | 6        | 40        |
| 14              | 1:2        | CuBr<br>(10 mol%)                            | Cs <sub>2</sub> CO <sub>3</sub><br>(50 mol%)      | 1,4-dioxane        | 25        | 6        | 55        |
| 15              | 1:1.5      | CuBr<br>(10 mol%)                            | Cs <sub>2</sub> CO <sub>3</sub><br>(30 mol%)      | 1,4-dioxane        | 25        | 6        | 66        |
| 16              | 1:2.5      | CuBr<br>(10 mol%)                            | Cs <sub>2</sub> CO <sub>3</sub><br>(30 mol%)      | 1,4-dioxane        | 25        | 24       | 68        |
| 17              | 1:2        | CuBr<br>(10 mol%)                            | Cs <sub>2</sub> CO <sub>3</sub><br>(30 mol%)      | 1,4-dioxane        | 60        | 6        | 63        |
| 18              | 1:2        | CuBr<br>(10 mol%)                            | K <sub>2</sub> CO <sub>3</sub><br>(30 mol%)       | 1,4-dioxane        | 25        | 6        | 70        |
| 19 <sup>c</sup> | 1:2        | CuBr<br>(10 mol%)                            | <i>t</i> -BuOK<br>(30 mol%)                       | 1,4-dioxane        | 25        | 6        | 22        |
| 20 <sup>c</sup> | 1:2        | CuBr<br>(10 mol%)                            | DBU<br>(30 mol%)                                  | 1,4-dioxane        | 25        | 6        | 44        |

|                 |     |                   |                                              |                    |    |   |    |
|-----------------|-----|-------------------|----------------------------------------------|--------------------|----|---|----|
| 21 <sup>c</sup> | 1:2 | CuBr<br>(10 mol%) | K <sub>3</sub> PO <sub>4</sub><br>(30 mol%)  | 1,4-dioxane        | 25 | 6 | 50 |
| 22 <sup>c</sup> | 1:2 | CuBr<br>(10 mol%) | Cs <sub>2</sub> CO <sub>3</sub><br>(30 mol%) | DCE                | 25 | 6 | 52 |
| 23 <sup>c</sup> | 1:2 | CuBr<br>(10 mol%) | Cs <sub>2</sub> CO <sub>3</sub><br>(30 mol%) | CH <sub>3</sub> CN | 25 | 6 | 30 |
| 24 <sup>c</sup> | 1:2 | CuBr<br>(10 mol%) | Cs <sub>2</sub> CO <sub>3</sub><br>(30 mol%) | EtOAc              | 25 | 6 | 61 |
| 25 <sup>c</sup> | 1:2 | CuBr<br>(10 mol%) | Cs <sub>2</sub> CO <sub>3</sub><br>(30 mol%) | THF                | 25 | 6 | 44 |
| 26 <sup>d</sup> | 1:2 | CuBr<br>(10 mol%) | Cs <sub>2</sub> CO <sub>3</sub><br>(30 mol%) | 1,4-dioxane        | 25 | 6 | 77 |
| 27 <sup>e</sup> | 1:2 | CuBr<br>(10 mol%) | Cs <sub>2</sub> CO <sub>3</sub><br>(30 mol%) | 1,4-dioxane        | 25 | 6 | 76 |

<sup>c</sup>Reaction conditions: **1a** (0.2 mmol), **2a**, base and catalyst, solvent (2.0 mL) in open air. <sup>b</sup>Isolated yields. <sup>c</sup>H NMR yield (using CH<sub>2</sub>Br<sub>2</sub> as internal standard). <sup>d</sup>N<sub>2</sub> atmosphere. <sup>e</sup>O<sub>2</sub> atmosphere.

### 2.3 General procedure for the synthesis of 3-8 (**3a** as an example):

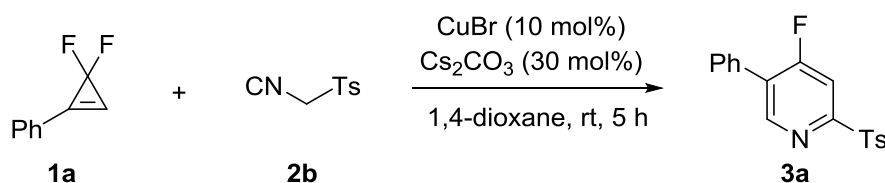

(3,3-difluorocycloprop-1-en-1-yl) benzene **1a** (30.4 mg, 0.2 mmol), *p*-methylbenzene sulfonyl methyl isonitrile **2a** (78.1 mg, 0.4 mmol), CuBr (2.8 mg, 0.02 mmol), Cs<sub>2</sub>CO<sub>3</sub> (19.5 mg, 0.06 mmol) and 1,4-dioxane (2 mL) were successively added into a 15 mL pressure tube. The reaction was carried out at 25 °C for 5 h, and TLC was used to monitor the reaction process. Cooled to room temperature, the reaction mixture was poured into 50 mL of saturated aqueous NH<sub>4</sub>Cl and extracted with DCM (CH<sub>2</sub>Cl<sub>2</sub>, 20 mL×3). The combined organics were dried (Na<sub>2</sub>SO<sub>4</sub>) and concentrated *in vacuo*. The residue was purified by column chromatography (petroleum ether/EtOAc = 25:1 to 10:1, v/v) to afford the desired product **3a** (61 mg, 93% yield).

## 2.4 General procedure for the synthesis of 9

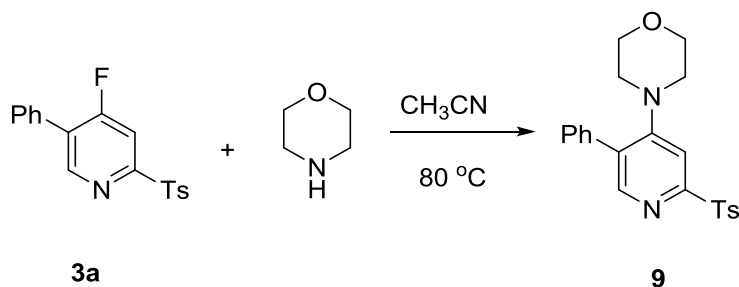

To a stirred solution of 4-fluoro-5-phenyl-2-tosylpyridine **3a** (65.4 mg, 0.2 mmol) in MeCN (0.2 mL) was added morpholine (0.136 mL, 0.8 mmol) and the reaction mixture was stirred at  $80\text{ }^\circ\text{C}$  for 9 h. The reaction mixture was concentrated under reduced pressure. The crude mixture was purified by flash chromatography (petroleum ether/EtOAc = 25:1 to 10:1, v/v) to afford the desired product **9** (70 mg, 89% yield) as a white solid.

## 2.5 General procedure for the synthesis of 10

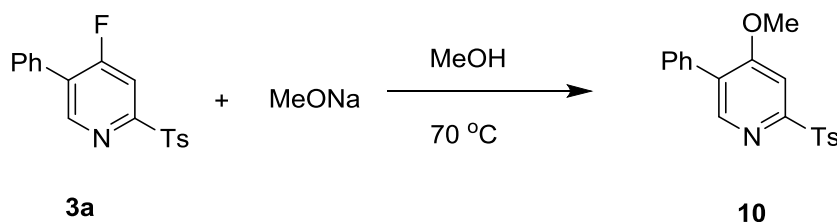

To a stirred solution of Na (0.4 mmol) in MeOH (2 mL) at  $0\text{ }^\circ\text{C}$ . And was added 4-fluoro-5-phenyl-2-tosylpyridine **3a** (65.4 mg, 0.2 mmol) and the reaction mixture was stirred at  $70\text{ }^\circ\text{C}$  for 1 h. An aqueous saturated  $\text{NH}_4\text{Cl}$  solution was added to the mixture and the aqueous phase was extracted with AcOEt (20 mL $\times$ 3). The combined organic phases were dried over  $\text{Na}_2\text{SO}_4$  and concentrated under reduced pressure. The crude mixture was purified by flash chromatography (petroleum ether/EtOAc = 25:1 to 10:1, v/v) to afford the desired product **10** (64 mg, 94% yield) as a white solid.

## 2.6 General procedure for the synthesis of 11

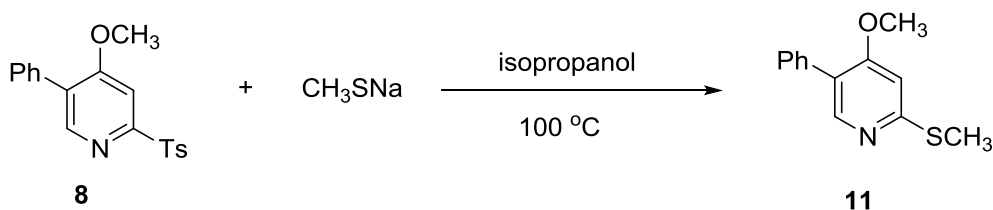

To a stirred solution of 4-methoxy-5-phenyl-2-tosylpyridine **8** (67.8 mg, 0.2 mmol) in isopropanol (2 mL) was added  $\text{CH}_3\text{SNa}$  (0.122 g, 1.6 mmol) and the reaction mixture was stirred at 100 °C for 12 h. An aqueous saturated  $\text{NH}_4\text{Cl}$  solution was added to the mixture and the aqueous phase was extracted with DCM (20 mL $\times$ 3). The combined organic phases were dried over  $\text{Na}_2\text{SO}_4$  and concentrated under reduced pressure. The crude mixture was purified by flash chromatography (petroleum ether/EtOAc = 25:1 to 10:1, v/v) to afford the desired product **11** (35 mg, 76% yield) as a colorless oil.

## 2.7 General procedure for the synthesis of **12**

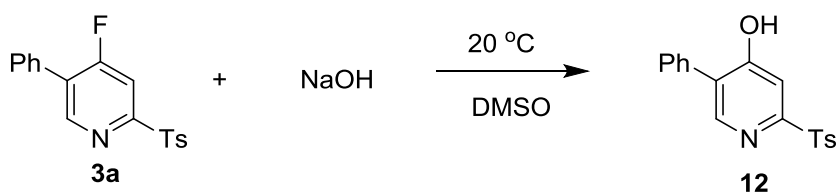

To a stirred solution of 4-fluoro-5-phenyl-2-tosylpyridine **3a** (65.4 mg, 0.2 mmol) in DMSO (2 mL) was added NaOH (0.016 g, 0.4 mmol) and the reaction mixture was stirred at 20 °C for 12 h. An aqueous saturated  $\text{NH}_4\text{Cl}$  solution was added to the mixture and the aqueous phase was extracted with AcOEt (20 mL $\times$ 3). The combined organic phases were dried over  $\text{Na}_2\text{SO}_4$  and concentrated under reduced pressure. The crude mixture was purified by flash chromatography (petroleum ether/EtOAc = 25:1 to 10:1, v/v) to afford the desired product **12** (47 mg, 71% yield) as a white solid.

## 2.8 General procedure for the synthesis of **13**

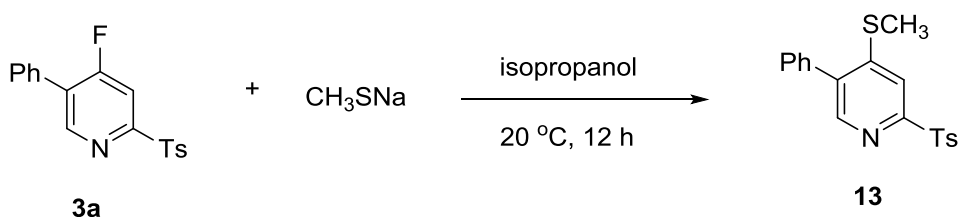

To a stirred solution of 4-fluoro-5-phenyl-2-tosylpyridine **3a** (65.4 mg, 0.2 mmol) in isopropanol (2 mL) was added  $\text{CH}_3\text{SNa}$  (0.084 g, 1.2 mmol) and the reaction mixture was stirred at 20 °C for 12 h. An aqueous saturated  $\text{NH}_4\text{Cl}$  solution was added to the mixture and the aqueous phase was extracted with DCM (20 mL $\times$ 3). The combined organic phases were dried over  $\text{Na}_2\text{SO}_4$  and concentrated under reduced pressure. The crude mixture was purified by flash chromatography (petroleum ether/EtOAc = 25:1 to 10:1, v/v) to afford the desired product **13** (69 mg, 97% yield)

as a white solid.

## 2.9 General procedure for the synthesis of 14

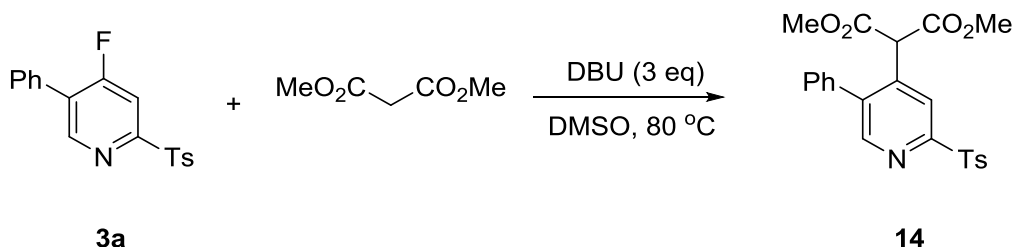

To a stirred solution of 4-fluoro-5-phenyl-2-tosylpyridine **3a** (65.4 mg, 0.2 mmol) in DMSO (0.5 mL) was added dimethyl malonate (0.071 mL, 0.6 mmol) and DBU (0.093 mL, 0.6 mmol) and the reaction mixture was stirred at 80 °C for 6 h. An aqueous saturated  $\text{NH}_4\text{Cl}$  solution was added to the mixture and the aqueous phase was extracted with AcOEt (20 mL $\times$ 3). The combined organic phases were dried over  $\text{Na}_2\text{SO}_4$  and concentrated under reduced pressure. The crude mixture was purified by flash chromatography (petroleum ether/EtOAc = 25:1 to 10:1, v/v) to afford the desired product **14** (60 mg, 68% yield) as a white solid.

## 2.10 General procedure for the synthesis of 15

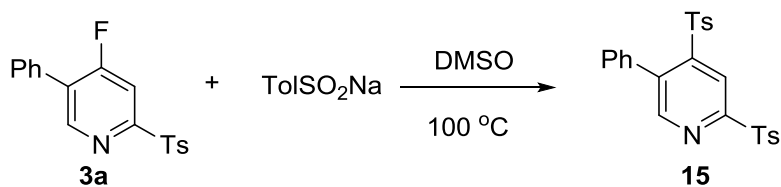

To a stirred solution of 4-fluoro-5-phenyl-2-tosylpyridine **3a** (65.4 mg, 0.2 mmol) in DMSO (2 mL) was  $\text{NaSO}_2\text{Ar}$  (54 mg, 0.3 mmol) and the reaction mixture was stirred at 100 °C for 3 h. An aqueous saturated  $\text{NH}_4\text{Cl}$  solution was added to the mixture and the aqueous phase was extracted with AcOEt (20 mL $\times$ 3). The combined organic phases were dried over  $\text{Na}_2\text{SO}_4$  and concentrated under reduced pressure. The crude mixture was purified by flash chromatography (petroleum ether/EtOAc = 25:1 to 10:1, v/v) to afford the desired product **15** (83 mg, 90% yield) as a white solid.

### 3. Analytical Data of Compounds

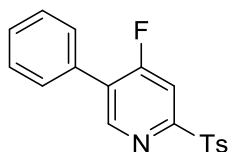

**3a, 4-Fluoro-5-phenyl-2-tosylpyridine:** White solid, 93% yield, 61 mg, m.p. 145–146 °C.  $^1\text{H}$  NMR (400 MHz,  $\text{CDCl}_3$ )  $\delta$  8.71 (d,  $J = 9.2$  Hz, 1H), 8.02-7.98 (m, 3H), 7.52-7.41 (m, 5H), 7.36 (d,  $J = 8.0$  Hz, 2H), 2.41 (s, 3H).  $^{19}\text{F}$  NMR (376 MHz,  $\text{CDCl}_3$ )  $\delta$  -103.2.  $^{13}\text{C}$  NMR (100 MHz,  $\text{CDCl}_3$ )  $\delta$  165.7 (d,  $J = 268$  Hz), 159.7 (d,  $J = 6$  Hz), 152.7 (d,  $J = 4$  Hz), 145.2, 135.2, 130.2, 129.8, 129.3, 128.9 (2C), 128.8 (d,  $J = 3$  Hz), 128.3 (d,  $J = 9$  Hz), 110.9 (d,  $J = 21$  Hz), 21.5. HRMS (ESI-TOF)  $m/z$  calculated for  $\text{C}_{18}\text{H}_{14}\text{FNO}_2\text{NaS}^+$  ( $[\text{M}+\text{Na}]^+$ ) 350.0621, found 350.0624.

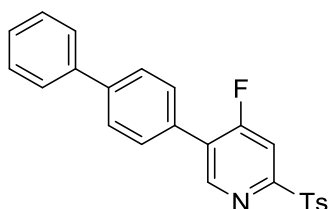

**3b, 5-([1,1'-Biphenyl]-4-yl)-4-fluoro-2-tosylpyridine:** White solid, 68% yield, 54 mg, m.p. 140–142 °C.  $^1\text{H}$  NMR (400 MHz,  $\text{CDCl}_3$ )  $\delta$  8.77 (d,  $J = 9.2$  Hz, 1H), 8.05-7.96 (m, 3H), 7.72 (d,  $J = 8.0$  Hz, 2H), 7.62 (t,  $J = 8.0$  Hz, 4H), 7.47 (t,  $J = 8.0$  Hz, 2H), 7.41-7.36 (m, 3H), 2.44 (s, 3H).  $^{19}\text{F}$  NMR (376 MHz,  $\text{CDCl}_3$ )  $\delta$  -103.0.  $^{13}\text{C}$  NMR (100 MHz,  $\text{CDCl}_3$ )  $\delta$  166.0 (d,  $J = 268$  Hz), 159.9 (d,  $J = 6$  Hz), 152.7 (d,  $J = 3$  Hz), 145.3, 142.4, 139.9, 135.4, 129.9, 129.4 (d,  $J = 4$  Hz), 129.2, 129.1, 128.9, 128.2 (d,  $J = 9.8$  Hz), 127.9, 127.7, 127.1, 111.2 (d,  $J = 22$  Hz), 21.7. HRMS (ESI-TOF)  $m/z$  calculated for  $\text{C}_{24}\text{H}_{18}\text{FNO}_2\text{NaS}^+$  ( $[\text{M}+\text{Na}]^+$ ) 426.0934, found 426.0931.

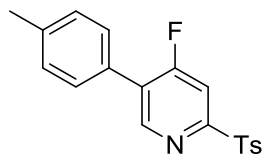

**3c, 4-Fluoro-5-(p-tolyl)-2-tosylpyridine:** White solid, 73% yield, 50 mg, m.p. 165–166 °C.  $^1\text{H}$  NMR (400 MHz,  $\text{CDCl}_3$ )  $\delta$  8.70 (d,  $J = 9.2$  Hz, 1H), 7.99-7.96 (m, 3H), 7.41 (dd,  $J = 8.0, 1.6$  Hz, 2H), 7.36 (d,  $J = 8.0$  Hz, 2H), 7.29 (d,  $J = 8.0$  Hz, 2H), 2.42 (s, 3H), 2.40 (s, 3H).  $^{19}\text{F}$  NMR (376 MHz,  $\text{CDCl}_3$ )  $\delta$  -103.4.  $^{13}\text{C}$  NMR (100 MHz,  $\text{CDCl}_3$ )  $\delta$  165.8 (d,  $J = 268$  Hz), 159.5 (d,  $J = 6$  Hz), 152.6 (d,  $J = 4$  Hz), 145.1, 139.7, 135.4, 129.8, 129.7, 128.9, 128.7 (d,  $J = 2.8$  Hz), 128.4 (d,  $J = 10$  Hz), 127.4, 110.9 (d,  $J = 22$  Hz), 21.6, 21.2. HRMS (ESI-TOF)  $m/z$  calculated for  $\text{C}_{19}\text{H}_{16}\text{FNO}_2\text{NaS}^+$  ( $[\text{M}+\text{Na}]^+$ ) 364.0778, found 364.0770.



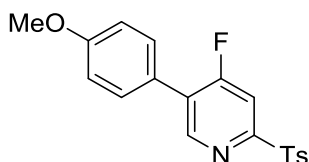

**3d, 4-Fluoro-5-(4-methoxyphenyl)-2-tosylpyridine:** White solid, 81% yield, 58 mg, m.p. 120–122 °C.  $^1\text{H NMR}$  (400 MHz,  $\text{CDCl}_3$ )  $\delta$  8.69 (d,  $J = 9.2$  Hz, 1H), 7.97 (d,  $J = 8.8$  Hz, 3H), 7.46 (dd,  $J = 8.8, 1.6$  Hz, 2H), 7.35 (d,  $J = 8.0$  Hz, 2H), 7.01 (d,  $J = 8.8$  Hz, 2H), 3.85 (s, 3H), 2.42 (s, 3H).  $^{19}\text{F NMR}$  (376 MHz,  $\text{CDCl}_3$ )  $\delta$  -103.7.  $^{13}\text{C NMR}$  (100 MHz,  $\text{CDCl}_3$ )  $\delta$  165.6 (d,  $J = 267$  Hz), 160.6, 159.0 (d,  $J = 6$  Hz), 152.4 (d,  $J = 4$  Hz), 145.1, 135.4, 130.2 (d,  $J = 3$  Hz), 129.8, 128.9, 128.1 (d,  $J = 9$  Hz), 122.5, 114.5, 111.0 (d,  $J = 22$  Hz), 55.3, 21.6. **HRMS** (ESI-TOF)  $m/z$  calculated for  $\text{C}_{19}\text{H}_{16}\text{FNO}_3\text{NaS}^+$  ( $[\text{M}+\text{Na}]^+$ ) 380.0727, found 380.0733.

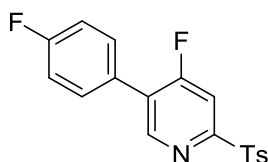

**3e, 4-Fluoro-5-(4-fluorophenyl)-2-tosylpyridine:** White solid, 96% yield, 66 mg, m.p. 163–164 °C.  $^1\text{H NMR}$  (400 MHz,  $\text{CDCl}_3$ )  $\delta$  8.69 (d,  $J = 9.2$  Hz, 1H), 8.03–7.95 (m, 3H), 7.52–7.48 (m, 2H), 7.36 (d,  $J = 8.0$  Hz, 2H), 7.18 (tt,  $J = 8.0$  Hz,  $J = 2.0$  Hz, 2H), 2.43 (s, 3H).  $^{19}\text{F NMR}$  (376 MHz,  $\text{CDCl}_3$ )  $\delta$  -103.3, -110.9.  $^{13}\text{C NMR}$  (100 MHz,  $\text{CDCl}_3$ )  $\delta$  165.8 (d,  $J = 267$  Hz), 163.3 (d,  $J = 249$  Hz), 160.0 (d,  $J = 6$  Hz), 152.5 (d,  $J = 4$  Hz), 145.3, 135.2, 130.9 (d,  $J = 3$  Hz), 130.8 (d,  $J = 3$  Hz), 129.9, 129.1, 127.4 (d,  $J = 10$  Hz), 126.3 (d,  $J = 4$  Hz), 116.2 (d,  $J = 22$  Hz), 111.0 (d,  $J = 22$  Hz), 21.6. **HRMS** (ESI-TOF)  $m/z$  calculated for  $\text{C}_{18}\text{H}_{13}\text{F}_2\text{NO}_2\text{NaS}^+$  ( $[\text{M}+\text{Na}]^+$ ) 368.0527, found 368.0541.

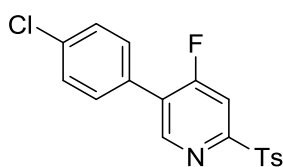

**3f, 5-(4-Chlorophenyl)-4-fluoro-2-tosylpyridine:** White solid, 85% yield, 61 mg, m.p. 155–156 °C.  $^1\text{H NMR}$  (400 MHz,  $\text{CDCl}_3$ )  $\delta$  8.68 (d,  $J = 9.2$  Hz, 1H), 8.00 (d,  $J = 8.4$  Hz, 1H), 7.97 (d,  $J = 8.4$  Hz, 2H), 7.49–7.42 (m, 4H), 7.36 (d,  $J = 8.0$  Hz, 2H), 2.43 (s, 3H).  $^{19}\text{F NMR}$  (376 MHz,  $\text{CDCl}_3$ )  $\delta$  -103.0.  $^{13}\text{C NMR}$  (100 MHz,  $\text{CDCl}_3$ )  $\delta$  165.9 (d,  $J = 268$  Hz), 160.3 (d,  $J = 6$  Hz), 152.5 (d,  $J = 4$  Hz), 145.3, 135.8, 135.2, 130.2 (d,  $J = 3$  Hz), 129.9, 129.3, 129.1, 128.8, 127.3 (d,  $J = 10$  Hz), 111.1 (d,  $J = 22$  Hz), 21.6. **HRMS** (ESI-TOF)  $m/z$  calculated for  $\text{C}_{18}\text{H}_{13}\text{ClFNO}_2\text{NaS}^+$  ( $[\text{M}+\text{Na}]^+$ ) 384.0232, found 384.0201.

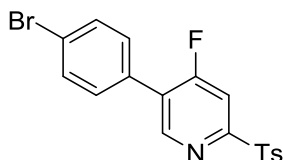

**3g, 5-(4-Bromophenyl)-4-fluoro-2-tosylpyridine:** White solid, 89% yield, 72 mg, m.p. 193–195 °C.  $^1\text{H NMR}$  (400 MHz,  $\text{CDCl}_3$ )  $\delta$  8.68 (d,  $J = 9.2$  Hz, 1H), 8.02–7.96 (m, 3H), 7.63 (d,  $J = 8.0$  Hz, 2H), 7.37 (d,  $J = 8.0$  Hz, 2H), 7.36 (d,  $J = 8.0$  Hz, 2H), 2.43 (s, 3H).  $^{19}\text{F NMR}$  (376 MHz,  $\text{CDCl}_3$ )  $\delta$  -102.9.  $^{13}\text{C NMR}$  (100 MHz,  $\text{CDCl}_3$ )  $\delta$  165.8 (d,  $J = 268$  Hz), 160.4 (d,  $J = 6$  Hz), 152.4 (d,  $J = 3$  Hz), 145.3, 135.2, 132.3, 130.4 (d,  $J = 3$  Hz), 129.9, 129.3, 129.1, 127.4 (d,  $J = 10$  Hz), 124.2, 111.0 (d,  $J = 22$  Hz), 21.6. **HRMS** (ESI-TOF)  $m/z$  calculated for  $\text{C}_{18}\text{H}_{13}\text{BrFNO}_2\text{NaS}^+$  ( $[\text{M}+\text{Na}]^+$ ) 427.9727, found 427.9702.

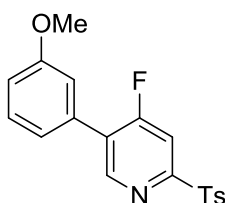

**3h, 4-Fluoro-5-(3-methoxyphenyl)-2-tosylpyridine:** White solid, 76% yield, 54 mg, m.p. 125–126 °C.  $^1\text{H NMR}$  (400 MHz,  $\text{CDCl}_3$ )  $\delta$  8.71 (d,  $J = 9.2$  Hz, 1H), 8.01–7.96 (m, 3H), 7.41–7.33 (m, 3H), 7.07 (d,  $J = 9.2$  Hz, 1H), 7.03–6.96 (m, 2H), 3.82 (s, 3H), 2.42 (s, 3H).  $^{19}\text{F NMR}$  (376 MHz,  $\text{CDCl}_3$ )  $\delta$  -103.8.  $^{13}\text{C NMR}$  (100 MHz,  $\text{CDCl}_3$ )  $\delta$  165.8 (d,  $J = 268$  Hz), 159.9 (d,  $J = 6$  Hz), 159.8, 152.7 (d,  $J = 4$  Hz), 145.2, 135.3, 131.6, 130.1, 129.8, 129.0, 128.3 (d,  $J = 10$  Hz), 121.2 (d,  $J = 3$  Hz), 114.8, 114.7 (d,  $J = 3$  Hz), 110.9 (d,  $J = 22$  Hz), 55.3, 21.6. **HRMS** (ESI-TOF)  $m/z$  calculated for  $\text{C}_{19}\text{H}_{16}\text{FNO}_3\text{NaS}^+$  ( $[\text{M}+\text{Na}]^+$ ) 380.0727, found 380.0733.

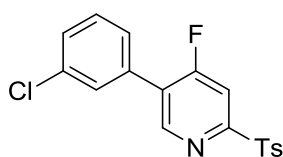

**3i, 5-(3-Chlorophenyl)-4-fluoro-2-tosylpyridine:** White solid, 93% yield, 67 mg, m.p. 150–151 °C.  $^1\text{H NMR}$  (400 MHz,  $\text{CDCl}_3$ )  $\delta$  8.68 (d,  $J = 9.2$  Hz, 1H), 8.01 (d,  $J = 9.2$  Hz, 1H), 7.97 (d,  $J = 8.0$  Hz, 2H), 7.48 (s, 1H), 7.46–7.41 (m, 2H), 7.39–7.35 (m, 3H), 2.43 (s, 3H).  $^{19}\text{F NMR}$  (376 MHz,  $\text{CDCl}_3$ )  $\delta$  -102.7.  $^{13}\text{C NMR}$  (100 MHz,  $\text{CDCl}_3$ )  $\delta$  165.8 (d,  $J = 268$  Hz), 160.5 (d,  $J = 6$  Hz), 152.5 (d,  $J = 3$  Hz), 145.3, 135.1, 134.9, 132.0, 130.3, 129.9, 129.6, 129.1, 128.9 (d,  $J = 3$  Hz), 127.1 (d,  $J = 3$  Hz), 127.0, 111.0 (d,  $J = 22$  Hz), 21.6. **HRMS** (ESI-TOF)  $m/z$  calculated for  $\text{C}_{18}\text{H}_{13}\text{ClFNO}_2\text{NaS}^+$  ( $[\text{M}+\text{Na}]^+$ ) 384.0232, found 384.0245.

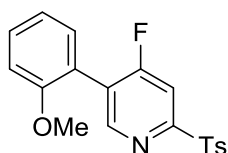

**3j, 4-Fluoro-5-(2-methoxyphenyl)-2-tosylpyridine:** White solid, 60% yield, 43 mg, m.p. 123–125 °C.  $^1\text{H NMR}$  (400 MHz,  $\text{CDCl}_3$ )  $\delta$  8.64 (d,  $J = 8.8$  Hz, 1H), 8.00 (d,  $J = 8.0$  Hz, 2H), 7.97 (d,  $J = 8.8$  Hz, 1H), 7.44 (td,  $J = 8.0, 2.0$  Hz, 1H), 7.37 (d,  $J = 8.0$  Hz, 2H), 7.21 (d,  $J = 6.4$  Hz, 1H), 7.08–6.98 (m, 2H), 3.78 (s, 3H), 2.43 (s, 3H).  $^{19}\text{F NMR}$  (376 MHz,  $\text{CDCl}_3$ )  $\delta$  -98.4.  $^{13}\text{C NMR}$  (100 MHz,  $\text{CDCl}_3$ )  $\delta$  166.2 (d,  $J = 268$  Hz), 159.7 (d,  $J = 6$  Hz), 156.8, 154.0 (d,  $J = 4$  Hz), 145.1, 135.4, 131.1, 130.9 (d,  $J = 2$  Hz), 129.8, 129.0, 126.1 (d,  $J = 12$  Hz), 120.7, 119.4, 111.1, 110.6 (d,  $J = 22$  Hz), 55.5, 21.6. **HRMS** (ESI-TOF)  $m/z$  calculated for  $\text{C}_{19}\text{H}_{16}\text{FNO}_3\text{NaS}^+$  ( $[\text{M}+\text{Na}]^+$ ) 380.0727, found 380.0742.

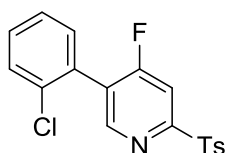

**3k, 5-(2-Chlorophenyl)-4-fluoro-2-tosylpyridine:** White solid, 90% yield, 65 mg, m.p. 148–149 °C.  $^1\text{H NMR}$  (400 MHz,  $\text{CDCl}_3$ )  $\delta$  8.60 (d,  $J = 8.8$  Hz, 1H), 8.03–7.99 (m, 3H), 7.52 (dd,  $J = 8.0, 2.0$  Hz, 1H), 7.46–7.34 (m, 4H), 7.29–7.25 (m, 1H), 2.44 (s, 3H).  $^{19}\text{F NMR}$  (376 MHz,  $\text{CDCl}_3$ )  $\delta$  -97.9.  $^{13}\text{C NMR}$  (100 MHz,  $\text{CDCl}_3$ )  $\delta$  166.6 (d,  $J = 268$  Hz), 161.0 (d,  $J = 6$  Hz), 153.5 (d,  $J = 3$  Hz), 145.3, 135.1, 133.6, 131.3, 130.8, 129.9, 129.8, 129.6, 129.2, 127.1, 126.7 (d,  $J = 12$  Hz), 110.6 (d,  $J = 22$  Hz), 21.6. **HRMS** (ESI-TOF)  $m/z$  calculated for  $\text{C}_{18}\text{H}_{13}\text{ClFNO}_2\text{NaS}^+$  ( $[\text{M}+\text{Na}]^+$ ) 384.0232, found 384.0201.

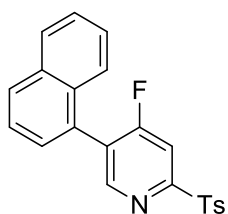

**3l, 4-Fluoro-5-(naphthalen-1-yl)-2-tosylpyridine:** White solid, 86% yield, 65 mg, m.p. 165–166 °C.  $^1\text{H NMR}$  (400 MHz,  $\text{CDCl}_3$ )  $\delta$  8.71 (d,  $J = 8.8$  Hz, 1H), 8.10 (d,  $J = 8.0$  Hz, 1H), 8.04 (d,  $J = 8.0$  Hz, 2H), 8.01–7.92 (m, 2H), 7.59–7.52 (m, 2H), 7.48–7.47 (m, 2H), 7.41–7.38 (m, 3H), 2.46 (s, 3H).  $^{19}\text{F NMR}$  (376 MHz,  $\text{CDCl}_3$ )  $\delta$  -98.1.  $^{13}\text{C NMR}$  (100 MHz,  $\text{CDCl}_3$ )  $\delta$  166.4 (d,  $J = 268$  Hz), 160.7 (d,  $J = 5$  Hz), 154.2 (d,  $J = 4$  Hz), 145.4, 135.2, 133.5, 131.1, 130.0, 129.9, 129.2, 128.6, 128.2, 128.1, 127.9 (d,  $J = 12$  Hz), 127.0, 126.4, 125.1, 124.6, 110.7 (d,  $J = 22$  Hz), 21.6. **HRMS** (ESI-TOF)  $m/z$  calculated for  $\text{C}_{22}\text{H}_{16}\text{FNO}_2\text{NaS}^+$  ( $[\text{M}+\text{Na}]^+$ ) 400.0778, found 400.0791.

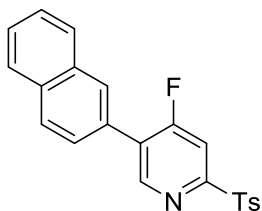

**3m, 4-Fluoro-5-(naphthalen-2-yl)-2-tosylpyridine:** White solid, 93% yield, 70 mg, m.p. 160–162 °C.  $^1\text{H NMR}$  (400 MHz,  $\text{CDCl}_3$ )  $\delta$  8.83 (d,  $J = 9.2$  Hz, 1H), 8.05 (d,  $J = 9.2$  Hz, 1H), 8.01 (d,  $J = 8.0$  Hz, 3H), 7.95 (d,  $J = 8.0$  Hz, 1H), 7.92–7.85 (m, 2H), 7.62–7.52 (m, 3H), 7.37 (d,  $J = 8.0$  Hz, 2H), 2.44 (s, 3H).  $^{19}\text{F NMR}$  (376 MHz,  $\text{CDCl}_3$ )  $\delta$  -103.0.  $^{13}\text{C NMR}$  (100 MHz,  $\text{CDCl}_3$ )  $\delta$  166.1 (d,  $J = 268$  Hz), 159.9 (d,  $J = 6$  Hz), 153.0 (d,  $J = 3$  Hz), 145.2, 135.4, 133.3, 133.1, 129.9, 129.1, 128.9 (d,  $J = 3$  Hz), 128.8, 128.5 (d,  $J = 10$  Hz), 128.3, 127.7 (2C), 127.3, 126.9, 125.8 (d,  $J = 3$  Hz), 111.1 (d,  $J = 22$  Hz), 21.6. **HRMS** (ESI-TOF)  $m/z$  calculated for  $\text{C}_{22}\text{H}_{16}\text{FNO}_2\text{NaS}^+$  ( $[\text{M}+\text{Na}]^+$ ) 400.0778, found 400.0792.

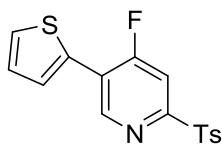

**3n, 4-Fluoro-5-(thiophen-2-yl)-2-tosylpyridine:** White solid, 56% yield, 38 mg, m.p. 148–149 °C.  $^1\text{H NMR}$  (400 MHz,  $\text{CDCl}_3$ )  $\delta$  8.91 (d,  $J = 9.2$  Hz, 1H), 8.01–7.93 (m, 3H), 7.59 (d,  $J = 4.0$  Hz, 1H), 7.52 (dd,  $J = 5.2, 0.8$  Hz, 1H), 7.35 (d,  $J = 8.0$  Hz, 2H), 7.18 (m, 1H), 2.42 (s, 3H).  $^{19}\text{F NMR}$  (376 MHz,  $\text{CDCl}_3$ )  $\delta$  -100.2.  $^{13}\text{C NMR}$  (100 MHz,  $\text{CDCl}_3$ )  $\delta$  164.4 (d,  $J = 269$  Hz), 158.8 (d,  $J = 6$  Hz), 150.6 (d,  $J = 4$  Hz), 145.2, 135.3, 131.3 (d,  $J = 4$  Hz), 129.9, 129.0, 128.9 (d,  $J = 6$  Hz), 128.7 (d,  $J = 4$  Hz), 128.3, 122.2 (d,  $J = 9$  Hz), 111.1 (d,  $J = 22$  Hz), 21.7. **HRMS** (ESI-TOF)  $m/z$  calculated for  $\text{C}_{16}\text{H}_{12}\text{FNO}_2\text{NaS}_2^+$  ( $[\text{M}+\text{Na}]^+$ ) 356.0186, found 356.0165.

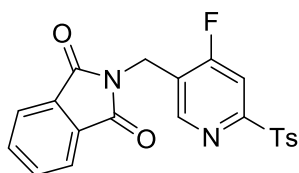

**3o, 2-((4-Fluoro-6-tosylpyridin-3-yl)methyl)isoindolin-1,3-dione:** White solid, 65% yield, 53mg, m.p. 170–172 °C.  $^1\text{H NMR}$  (400 MHz,  $\text{CDCl}_3$ )  $\delta$  8.67 (d,  $J = 8.8$  Hz, 1H), 7.92 (d,  $J = 8.4$  Hz, 3H), 7.86–7.84 (m, 2H), 7.77–7.72 (m, 2H), 7.32 (d,  $J = 8.0$  Hz, 2H), 4.94 (s, 2H), 2.41 (s, 3H).  $^{19}\text{F NMR}$  (376 MHz,  $\text{CDCl}_3$ )  $\delta$  -101.0.  $^{13}\text{C NMR}$  (100 MHz,  $\text{CDCl}_3$ )  $\delta$  167.3, 167.1 (d,  $J = 269$

Hz), 161.2 (d,  $J = 6$  Hz), 153.3 (d,  $J = 4$  Hz), 145.3, 135.0, 134.4, 131.7, 129.9, 129.2, 123.7, 123.2 (d,  $J = 9$  Hz), 110.4 (d,  $J = 22$  Hz), 32.7 (d,  $J = 4$  Hz), 21.6. **HRMS** (ESI-TOF)  $m/z$  calculated for  $C_{21}H_{15}FN_2NaO_4S^+$  ( $[M+Na]^+$ ) 433.0629, found 433.0628.

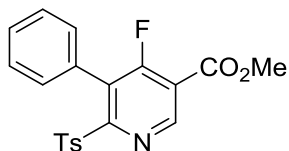

**3p, Methyl 4-fluoro-5-phenyl-6-tosylnicotinate:** White solid, 27% yield, 21 mg, m.p. 169–171 °C.  **$^1H$  NMR** (400 MHz,  $CDCl_3$ )  $\delta$  9.13 (d,  $J = 8.0$  Hz, 1H), 7.56 (d,  $J = 8.0$  Hz, 2H), 7.49-7.42 (m, 3H), 7.27-7.21 (m, 4H), 3.96 (s, 3H), 2.42 (s, 3H).  **$^{19}F$  NMR** (376 MHz,  $CDCl_3$ )  $\delta$  -95.40. **HRMS** (ESI-TOF)  $m/z$  calculated for  $C_{20}H_{16}FNO_4NaS^+$  ( $[M+Na]^+$ ) 408.0676, found 408.0686.

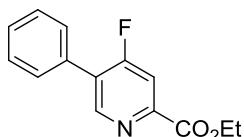

**4a, Ethyl 4-fluoro-5-phenylpicolinate:** yellow oil, 79% yield, 39 mg.  **$^1H$  NMR** (400 MHz,  $CDCl_3$ )  $\delta$  8.80 (d,  $J = 10.0$  Hz, 1H), 7.93 (d,  $J = 10.0$  Hz, 1H), 7.56 (d,  $J = 8.0$  Hz, 2H), 7.52-7.42 (m, 3H), 4.49 (q,  $J = 7.2$  Hz, 2H), 1.45 (d,  $J = 7.2$  Hz, 3H).  **$^{19}F$  NMR** (376 MHz,  $CDCl_3$ )  $\delta$  -106.6.  **$^{13}C$  NMR** (100 MHz,  $CDCl_3$ )  $\delta$  165.8 (d,  $J = 263$  Hz), 164.1 (d,  $J = 4$  Hz), 152.1 (d,  $J = 4$  Hz), 149.4 (d,  $J = 4$  Hz), 131.1, 129.2, 129.0 (d,  $J = 4$  Hz), 128.9, 128.3 (d,  $J = 10$  Hz), 113.6 (d,  $J = 20$  Hz), 62.3, 14.3. **HRMS** (ESI-TOF)  $m/z$  calculated for  $C_{14}H_{12}FNNaO_2^+$  ( $[M+Na]^+$ ) 268.0744, found 268.0737

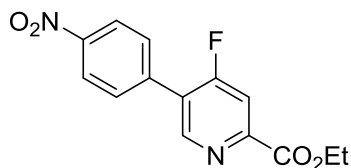

**4b, Ethyl 4-fluoro-5-(4-nitrophenyl)picolinate:** yellow oil, 62% yield, 36 mg.  **$^1H$  NMR** (400 MHz,  $CDCl_3$ )  $\delta$  8.84 (d,  $J = 9.6$  Hz, 1H), 8.37 (d,  $J = 9.6$  Hz, 2H), 8.00 (d,  $J = 9.6$  Hz, 1H), 7.77 (dd,  $J = 8.8, 1.6$  Hz, 2H), 4.53 (q,  $J = 7.2$  Hz, 2H), 1.47 (t,  $J = 7.2$  Hz, 3H).  **$^{19}F$  NMR** (376 MHz,  $CDCl_3$ )  $\delta$  -105.5.  **$^{13}C$  NMR** (100 MHz,  $CDCl_3$ )  $\delta$  165.9 (d,  $J = 265$  Hz), 163.7 (d,  $J = 4$  Hz), 151.7 (d,  $J = 3$  Hz), 151.1 (d,  $J = 8$  Hz), 148.2, 137.5, 130.0 (d,  $J = 3$  Hz), 126.2 (d,  $J = 10$  Hz), 124.1, 113.7 (d,  $J = 20$  Hz), 62.6, 14.3. **HRMS** (ESI-TOF)  $m/z$  calculated for  $C_{14}H_{11}FN_2NaO_4^+$  ( $[M+Na]^+$ ) 313.0595, found 313.0585.

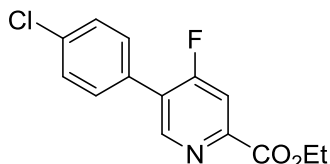

**4c, Ethyl 5-(4-chlorophenyl)-4-fluoropicolinate.** yellow oil, 75% yield, 42 mg.  $^1\text{H NMR}$  (400 MHz,  $\text{CDCl}_3$ )  $\delta$  8.80 (d,  $J = 10.0$  Hz, 1H), 7.96 (d,  $J = 10.0$  Hz, 1H), 7.54-7.48 (m, 4H), 4.52 (q,  $J = 7.2$  Hz, 2H), 1.47 (t,  $J = 7.2$  Hz, 3H).  $^{19}\text{F NMR}$  (376 MHz,  $\text{CDCl}_3$ )  $\delta$  -106.4.  $^{13}\text{C NMR}$  (100 MHz,  $\text{CDCl}_3$ )  $\delta$  165.7 (d,  $J = 264$  Hz), 163.8 (d,  $J = 3$  Hz), 151.7 (d,  $J = 3$  Hz), 149.8 (d,  $J = 7$  Hz), 135.5, 130.2 (d,  $J = 3$  Hz), 129.4, 129.2, 127.2 (d,  $J = 10$  Hz), 113.5 (d,  $J = 20$  Hz), 62.3, 14.2. **HRMS** (ESI-TOF)  $m/z$  calculated for  $\text{C}_{14}\text{H}_{11}\text{ClFNNaO}_2^+$  ( $[\text{M}+\text{Na}]^+$ ) 302.0355, found 302.0386.

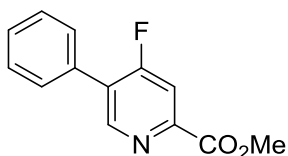

**4d, Methyl 4-fluoro-5-phenylpicolinate:** yellow oil, 70% yield, 32 mg.  $^1\text{H NMR}$  (400 MHz,  $\text{CDCl}_3$ )  $\delta$  8.82 (d,  $J = 10.0$  Hz, 1H), 7.96 (d,  $J = 10.0$  Hz, 1H), 7.61-7.57 (m, 2H), 7.55-7.46 (m, 3H), 4.05 (s, 3H).  $^{19}\text{F NMR}$  (376 MHz,  $\text{CDCl}_3$ )  $\delta$  -106.4.  $^{13}\text{C NMR}$  (100 MHz,  $\text{CDCl}_3$ )  $\delta$  165.7 (d,  $J = 264$  Hz), 164.4 (d,  $J = 4$  Hz), 152.0 (d,  $J = 3$  Hz), 149.1 (d,  $J = 7$  Hz), 131.0, 129.2, 129.0 (d,  $J = 3$  Hz), 128.9, 128.5 (d,  $J = 10$  Hz), 113.6 (d,  $J = 22$  Hz), 53.1. **HRMS** (ESI-TOF)  $m/z$  calculated for  $\text{C}_{13}\text{H}_{10}\text{FNNaO}_2^+$  ( $[\text{M}+\text{Na}]^+$ ) 254.0588, found 254.0614.

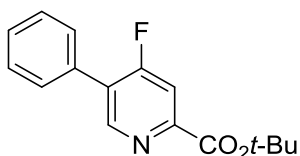

**4e, Tert-butyl 4-fluoro-5-phenylpicolinate:** yellow oil in, 70% yield, 39 mg.  $^1\text{H NMR}$  (400 MHz,  $\text{CDCl}_3$ )  $\delta$  8.80 (d,  $J = 10.0$  Hz, 1H), 7.85 (d,  $J = 10.4$  Hz, 1H), 7.57-7.55 (m, 2H), 7.53-7.42 (m, 3H), 1.65 (s, 9H).  $^{19}\text{F NMR}$  (376 MHz,  $\text{CDCl}_3$ )  $\delta$  -107.2.  $^{13}\text{C NMR}$  (100 MHz,  $\text{CDCl}_3$ )  $\delta$  165.8 (d,  $J = 263$  Hz), 162.9 (d,  $J = 4$  Hz), 152.0 (d,  $J = 4$  Hz), 150.9 (d,  $J = 7$  Hz), 131.2, 129.1, 129.0 (d,  $J = 3$  Hz), 128.9, 127.8 (d,  $J = 10$  Hz), 113.2 (d,  $J = 20$  Hz), 82.8, 28.0. **HRMS** (ESI-TOF)  $m/z$  calculated for  $\text{C}_{16}\text{H}_{16}\text{FNNaO}_2^+$  ( $[\text{M}+\text{Na}]^+$ ) 296.1057, found 296.1073.

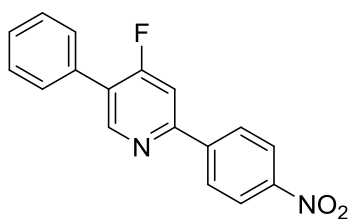

**4f, 4-Fluoro-2-(4-nitrophenyl)-5-phenylpyridine:** yellow oil, 34% yield, 20 mg.  $^1\text{H NMR}$  (400 MHz,  $\text{CDCl}_3$ )  $\delta$  8.82 (d,  $J = 10.4$  Hz, 1H), 8.35 (d,  $J = 6.8$  Hz, 2H), 8.22 (d,  $J = 6.8$  Hz, 2H), 7.66-7.59 (m, 3H), 7.55-7.50 (m, 2H), 7.50-7.44 (m, 1H).  $^{19}\text{F NMR}$  (376 MHz,  $\text{CDCl}_3$ )  $\delta$  -107.3.  $^{13}\text{C NMR}$  (100 MHz,  $\text{CDCl}_3$ )  $\delta$  166.2 (d,  $J = 262$  Hz), 156.2 (d,  $J = 7$  Hz), 152.2 (d,  $J = 4$  Hz), 148.4, 143.7, 131.5, 128.9 (2C), 128.8, 127.6, 125.1 (d,  $J = 10$  Hz), 124.1, 109.2 (d,  $J = 21$  Hz). **HRMS** (ESI-TOF)  $m/z$  calculated for  $\text{C}_{17}\text{H}_{11}\text{FN}_2\text{NaO}_2^+$  ( $[\text{M}+\text{Na}]^+$ ) 317.0697, found 317.0687.

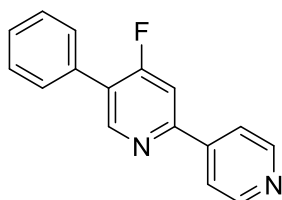

**4g, 4-Fluoro-5-phenyl-2,4'-bipyridine:** White solid, 55% yield, 28 mg, m.p. 135–136 °C.  $^1\text{H NMR}$  (400 MHz,  $\text{CDCl}_3$ )  $\delta$  8.81 (d,  $J = 9.2$  Hz, 3H), 7.92 (d,  $J = 4.8$  Hz, 2H), 7.68-7.58 (m, 3H), 7.56-7.42 (m, 3H).  $^{19}\text{F NMR}$  (376 MHz,  $\text{CDCl}_3$ )  $\delta$  -107.5.  $^{13}\text{C NMR}$  (100 MHz,  $\text{CDCl}_3$ )  $\delta$  166.2 (d,  $J = 268$  Hz), 156.1 (d,  $J = 8$  Hz), 152.2 (d,  $J = 4$  Hz), 150.6, 144.9 (d,  $J = 3$  Hz), 131.6, 128.9, 128.8, 125.4 (d,  $J = 10$  Hz), 120.9, 108.8 (d,  $J = 20$  Hz). **HRMS** (ESI-TOF)  $m/z$  calculated for  $\text{C}_{16}\text{H}_{11}\text{FN}_2\text{Na}^+$  ( $[\text{M}+\text{Na}]^+$ ) 273.0798, found 273.0791.

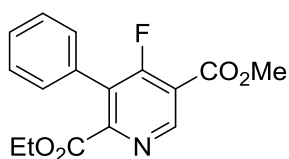

**5, 2-Ethyl 5-methyl 4-fluoro-3-phenylpyridine-2,5-dicarboxylate.** yellow oil, 75% yield, 45 mg.  $^1\text{H NMR}$  (400 MHz,  $\text{CDCl}_3$ )  $\delta$  9.13 (d,  $J = 8.4$  Hz, 1H), 7.52-7.43 (m, 3H), 7.35-7.33 (m, 2H), 4.17 (q,  $J = 7.2$  Hz, 2H), 3.99 (s, 3H), 1.04 (t,  $J = 7.2$  Hz, 3H).  $^{19}\text{F NMR}$  (376 MHz,  $\text{CDCl}_3$ )  $\delta$  -100.4.  $^{13}\text{C NMR}$  (100 MHz,  $\text{CDCl}_3$ )  $\delta$  165.1 (d,  $J = 274$  Hz), 165.0 (d,  $J = 3$  Hz), 162.6 (d,  $J = 3$  Hz), 155.0 (d,  $J = 4$  Hz), 152.2, 129.9, 129.2, 128.9, 128.4, 126.3 (d,  $J = 15$  Hz), 116.4 (d,  $J = 8$  Hz), 62.1, 52.9, 13.5. **HRMS** (ESI-TOF)  $m/z$  calculated for  $\text{C}_{16}\text{H}_{14}\text{FNNaO}_4^+$  ( $[\text{M}+\text{Na}]^+$ ) 326.0799, found 326.0822.

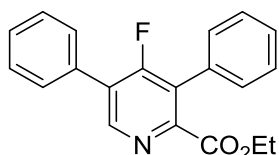

**6, Ethyl 4-fluoro-3,5-diphenylpicolinate.** yellow oil, 56% yield, 45 mg.  $^1\text{H NMR}$  (400 MHz,  $\text{CDCl}_3$ )  $\delta$  8.74 (d,  $J = 9.2$  Hz, 1H), 7.62-7.57 (m, 2H), 7.54-7.42 (m, 6H), 7.41-7.35 (m, 2H), 4.19 (q,  $J = 7.2$  Hz, 2H), 1.07 (t,  $J = 7.2$  Hz, 3H).  $^{19}\text{F NMR}$  (376 MHz,  $\text{CDCl}_3$ )  $\delta$  -109.9.  $^{13}\text{C NMR}$  (100 MHz,  $\text{CDCl}_3$ )  $\delta$  165.5 (d,  $J = 4$  Hz), 162.8 (d,  $J = 262$  Hz), 150.4 (d,  $J = 4$  Hz), 150.3 (d,  $J = 3$  Hz), 131.3, 131.2, 129.3, 129.1 (d,  $J = 3$  Hz), 129.0, 128.9, 128.6, 128.3, 127.1 (d,  $J = 10$  Hz), 126.3 (d,  $J = 15$  Hz), 61.8, 13.7. **HRMS** (ESI-TOF)  $m/z$  calculated for  $\text{C}_{20}\text{H}_{16}\text{FNNaO}_2^+$  ( $[\text{M}+\text{Na}]^+$ ) 344.1057, found 344.1078.

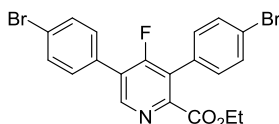

**7, Ethyl 3,5-bis(4-bromophenyl)-4-fluoropicolinate:** White solid, 82% yield, 78 mg. m.p. 125–126 °C.  $^1\text{H NMR}$  (400 MHz,  $\text{CDCl}_3$ )  $\delta$  8.72 (d,  $J = 9.2$  Hz, 1H), 7.65 (d,  $J = 8.4$  Hz, 2H), 7.60 (d,  $J = 8.4$  Hz, 2H), 7.48-7.43 (m, 2H), 7.24 (d,  $J = 8.4$  Hz, 2H), 4.23 (q,  $J = 7.2$  Hz, 2H), 1.15 (t,  $J = 7.2$  Hz, 3H).  $^{19}\text{F NMR}$  (376 MHz,  $\text{CDCl}_3$ )  $\delta$  -109.4.  $^{13}\text{C NMR}$  (100 MHz,  $\text{CDCl}_3$ )  $\delta$  165.1 (d,  $J = 4$  Hz), 162.4 (d,  $J = 262$  Hz), 150.4 (d,  $J = 4$  Hz), 150.3, 132.3, 131.6, 130.9, 130.6 (d,  $J = 3$  Hz), 129.9 (d,  $J = 12$  Hz), 126.2 (d,  $J = 12$  Hz), 125.5 (d,  $J = 16$  Hz), 123.8, 123.1, 62.1, 13.8. **HRMS** (ESI-TOF)  $m/z$  calculated for  $\text{C}_{20}\text{H}_{14}\text{Br}_2\text{FNO}_2\text{Na}^+$  ( $[\text{M}+\text{Na}]^+$ ) 499.9268, found 499.9285.

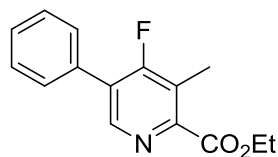

**8, Ethyl 4-fluoro-3-methyl-5-phenylpicolinate:** yellow oil, 34% yield, 18 mg.  $^1\text{H NMR}$  (400 MHz,  $\text{CDCl}_3$ )  $\delta$  8.61 (d,  $J = 9.2$  Hz, 1H), 7.59-7.43 (m, 5H), 4.49 (q,  $J = 7.2$  Hz, 2H), 2.56 (d,  $J = 2.4$  Hz, 3H), 1.47 (t,  $J = 7.2$  Hz, 3H).  $^{19}\text{F NMR}$  (376 MHz,  $\text{CDCl}_3$ )  $\delta$  -110.7.  $^{13}\text{C NMR}$  (100 MHz,  $\text{CDCl}_3$ )  $\delta$  165.6 (d,  $J = 37$  Hz), 164.5 (d,  $J = 260$  Hz), 149.0 (d,  $J = 14$  Hz), 148.7 (d,  $J = 4$  Hz), 131.6, 129.1 (d,  $J = 4$  Hz), 128.9, 128.8, 126.9 (d,  $J = 12$  Hz), 123.7 (d,  $J = 16$  Hz), 61.9, 14.3, 10.7 (d,  $J = 6$  Hz).



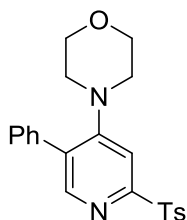

**9, 4-(5-Phenyl-2-tosylpyridin-4-yl)morpholine:** White solid, 89% yield, 70 mg. m.p. 178–179 °C.  $^1\text{H NMR}$  (400 MHz,  $\text{CDCl}_3$ )  $\delta$  8.27 (s, 1H), 7.97 (d,  $J = 8.0$  Hz, 2H), 7.70 (s, 1H), 7.51–7.41 (m, 4H), 7.39–7.33 (m, 3H), 3.67–3.59 (m, 4H), 3.06–2.96 (m, 4H), 2.42 (s, 3H).  $^{13}\text{C NMR}$  (100 MHz,  $\text{CDCl}_3$ )  $\delta$  158.7, 157.0, 152.4, 144.6, 136.8, 135.9, 130.0, 129.6, 129.1, 128.8, 128.4, 127.8, 109.8, 66.0, 49.4, 21.6. **HRMS** (ESI-TOF)  $m/z$  calculated for  $\text{C}_{22}\text{H}_{22}\text{NO}_3\text{SNa}^+$  ( $[\text{M}+\text{Na}]^+$ ) 417.1243, found 417.1256.

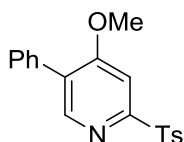

**10, 4-Methoxy-5-phenyl-2-tosylpyridine:** White solid, 94% yield, 64 mg, m.p. 128–130 °C.  $^1\text{H NMR}$  (400 MHz,  $\text{CDCl}_3$ )  $\delta$  8.45 (s, 1H), 7.99 (d,  $J = 8.4$  Hz, 2H), 7.82 (s, 1H), 7.46–7.40 (m, 5H), 7.35 (d,  $J = 8.0$  Hz, 2H), 3.98 (s, 3H), 2.42 (s, 3H).  $^{13}\text{C NMR}$  (100 MHz,  $\text{CDCl}_3$ )  $\delta$  163.7, 159.4, 151.2, 144.8, 135.8, 133.1, 129.8, 129.3, 129.1, 128.9, 128.4, 128.4, 104.9, 56.2, 21.6. **HRMS** (ESI-TOF)  $m/z$  calculated for  $\text{C}_{19}\text{H}_{17}\text{NaNO}_3\text{S}^+$  ( $[\text{M}+\text{Na}]^+$ ) 362.0821, found 362.0829.

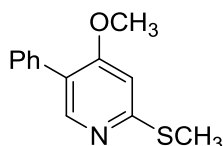

**11, 4-Methoxy-2-(methylthio)-5-phenylpyridine:** colorless oil, 76% yield, 35 mg.  $^1\text{H NMR}$  (400 MHz,  $\text{CDCl}_3$ )  $\delta$  8.27 (s, 1H), 7.49–7.47 (m, 2H), 7.41 (t,  $J = 7.6$  Hz, 2H), 7.37–7.31 (m, 1H), 6.77 (s, 1H), 3.82 (s, 3H), 2.61 (s, 3H).  $^{13}\text{C NMR}$  (100 MHz,  $\text{CDCl}_3$ )  $\delta$  162.3, 160.4, 149.8, 134.7, 129.3, 128.2, 127.4, 123.2, 103.5, 55.3, 13.3. **HRMS** (ESI-TOF)  $m/z$  calculated for  $\text{C}_{13}\text{H}_{13}\text{NaNOS}^+$  ( $[\text{M}+\text{H}]^+$ ) 254.0610, found 254.0623.

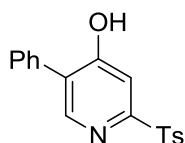

**12, 5-Phenyl-2-tosylpyridin-4-ol:** White solid, 71% yield, 47 mg, m.p. 230–232 °C.  $^1\text{H NMR}$  (400 MHz, DMSO)  $\delta$  11.86 (s, 1H), 8.43 (s, 1H), 7.86 (d,  $J = 8.0$  Hz, 2H), 7.74 (s, 1H), 7.57 (d,  $J = 7.2$  Hz, 2H), 7.48–7.35 (m, 5H), 2.39 (s, 3H).  $^{13}\text{C NMR}$  (100 MHz, DMSO)  $\delta$  163.0, 158.4, 151.8, 145.2, 136.1, 133.9, 130.5, 129.7, 129.0, 128.8, 128.6, 127.6, 109.8, 21.6. HRMS (ESI-TOF)  $m/z$  calculated for  $\text{C}_{18}\text{H}_{16}\text{NO}_3\text{S}^+$  ( $[\text{M}+\text{H}]^+$ ) 326.0845, found 326.0862.

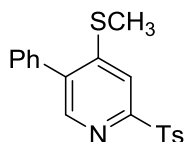

**13, 4-(Methylthio)-5-phenyl-2-tosylpyridine:** White solid, 97% yield, 69 mg, m.p. 127–129 °C.  $^1\text{H NMR}$  (400 MHz,  $\text{CDCl}_3$ )  $\delta$  8.28 (s, 1H), 8.00 (s, 2H), 7.98 (s, 1H), 7.48–7.44 (m, 3H), 7.39–7.33 (m, 4H), 2.52 (s, 3H), 2.44 (s, 3H).  $^{13}\text{C NMR}$  (100 MHz,  $\text{CDCl}_3$ )  $\delta$  157.8, 152.4, 149.1, 144.9, 137.8, 135.8, 135.2, 129.8, 129.1, 129.0, 128.9, 128.7, 115.7, 21.7, 14.6. HRMS (ESI-TOF)  $m/z$  calculated for  $\text{C}_{19}\text{H}_{17}\text{NaNO}_2\text{S}_2^+$  ( $[\text{M}+\text{Na}]^+$ ) 378.0593, found 378.0583.

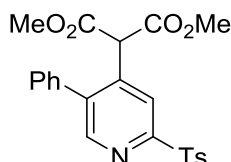

**14, Dimethyl 2-(5-phenyl-2-tosylpyridin-4-yl)malonate:** White solid, 68% yield, 60 mg, m.p. 180–181 °C.  $^1\text{H NMR}$  (400 MHz,  $\text{CDCl}_3$ )  $\delta$  8.57 (s, 1H), 8.46 (s, 1H), 8.01 (d,  $J = 8.0$  Hz, 2H), 7.50–7.47 (m, 3H), 7.36 (d,  $J = 8.0$  Hz, 2H), 7.28–7.24 (m, 2H), 4.89 (s, 1H), 3.77 (s, 6H), 2.43 (s, 3H).  $^{13}\text{C NMR}$  (100 MHz,  $\text{CDCl}_3$ )  $\delta$  166.8, 157.7, 151.4, 144.9, 141.1, 141.0, 135.8, 134.7, 129.8, 129.1, 129.0, 128.9, 122.6, 53.3, 21.6. HRMS (ESI-TOF)  $m/z$  calculated for  $\text{C}_{23}\text{H}_{21}\text{NO}_6\text{SNa}^+$  ( $[\text{M}+\text{Na}]^+$ ) 462.0982, found 462.0987.

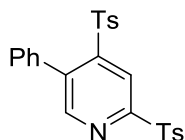

**15, 5-Phenyl-2,4-ditosylpyridine:** White solid, 90% yield, 83 mg, m.p. 170–172 °C.  $^1\text{H NMR}$  (400 MHz,  $\text{CDCl}_3$ )  $\delta$  9.01 (s, 1H), 8.51 (s, 1H), 8.02 (d,  $J = 8.4$  Hz, 2H), 7.41–7.38 (m, 3H), 7.30 (d,  $J = 8.0$  Hz, 2H), 7.11 (d,  $J = 8.4$  Hz, 2H), 7.03 (d,  $J = 8.0$  Hz, 2H), 7.01–6.97 (m, 2H), 2.45 (s, 3H), 2.35 (s, 3H).  $^{13}\text{C NMR}$  (100 MHz,  $\text{CDCl}_3$ )  $\delta$  159.2, 153.8, 150.2, 145.5, 145.1, 138.9, 135.2, 135.1, 133.0, 130.0, 129.8, 129.4, 129.2, 129.1, 128.3, 127.8, 119.5, 21.7, 21.6. HRMS (ESI-TOF)  $m/z$  calculated for  $\text{C}_{25}\text{H}_{21}\text{NaNO}_4\text{S}_2^+$  ( $[\text{M}+\text{Na}]^+$ ) 486.0804, found 486.0799.

#### 4. Copies of $^1\text{H}$ NMR, $^{19}\text{F}$ NMR and $^{13}\text{C}$ NMR spectra of compounds

##### $^1\text{H}$ NMR (400 MHz, $\text{CDCl}_3$ ) for **3a**

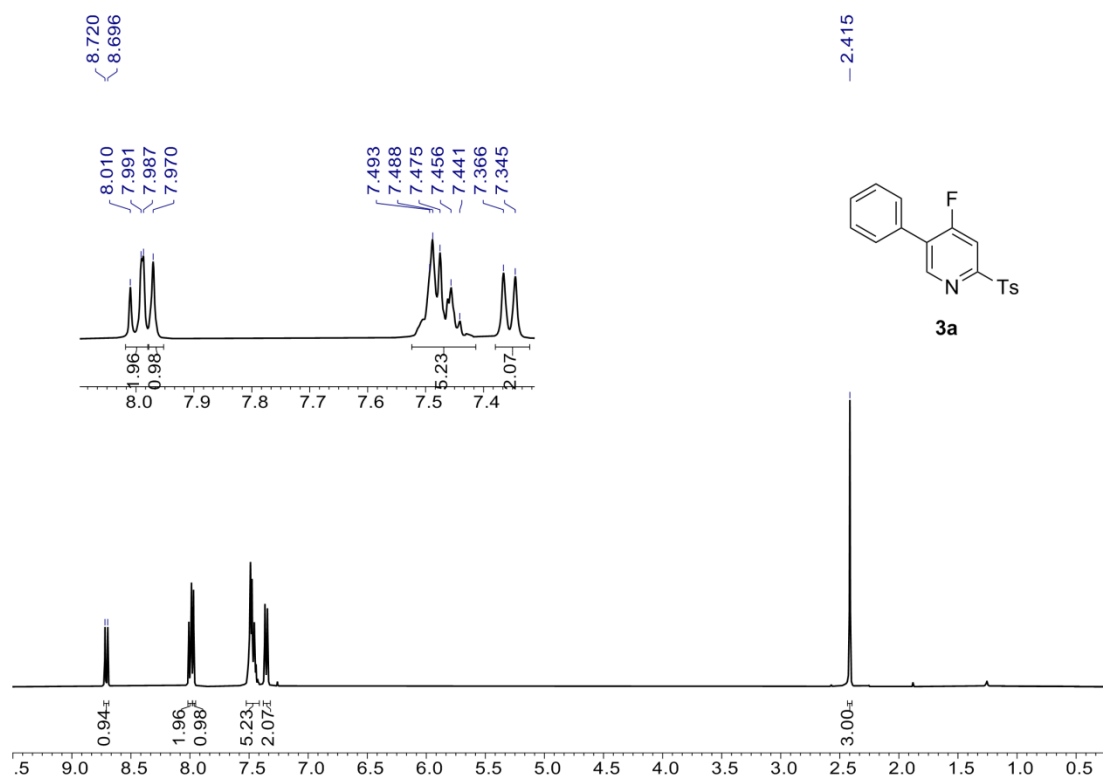

##### $^{19}\text{F}$ NMR (376 MHz, $\text{CDCl}_3$ ) for **3a**

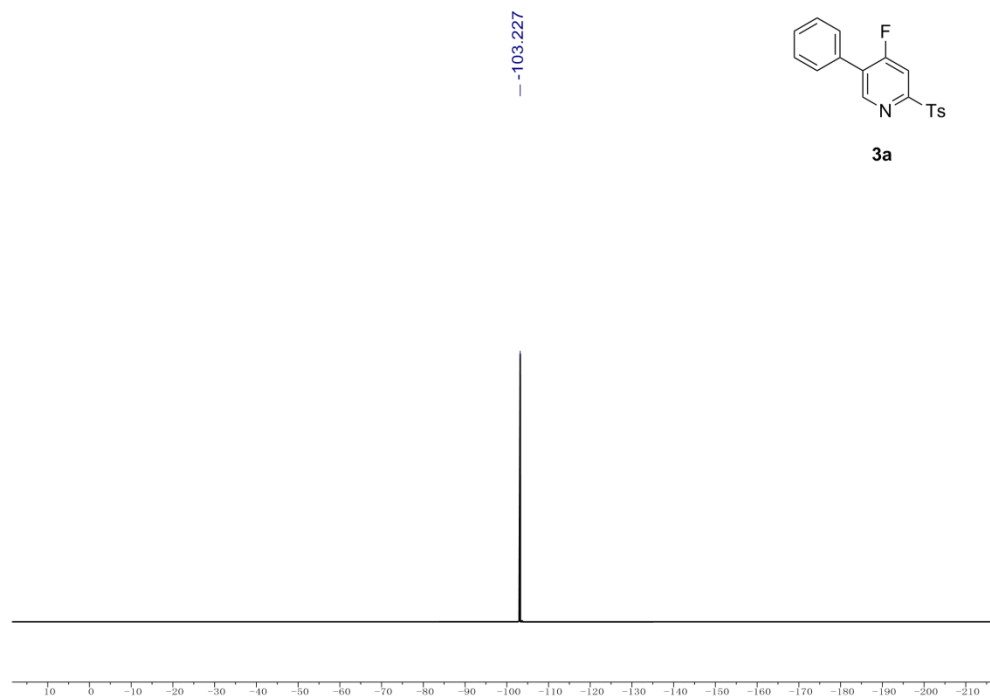

$^{13}\text{C}$  NMR (400 MHz,  $\text{CDCl}_3$ ) for **3a**

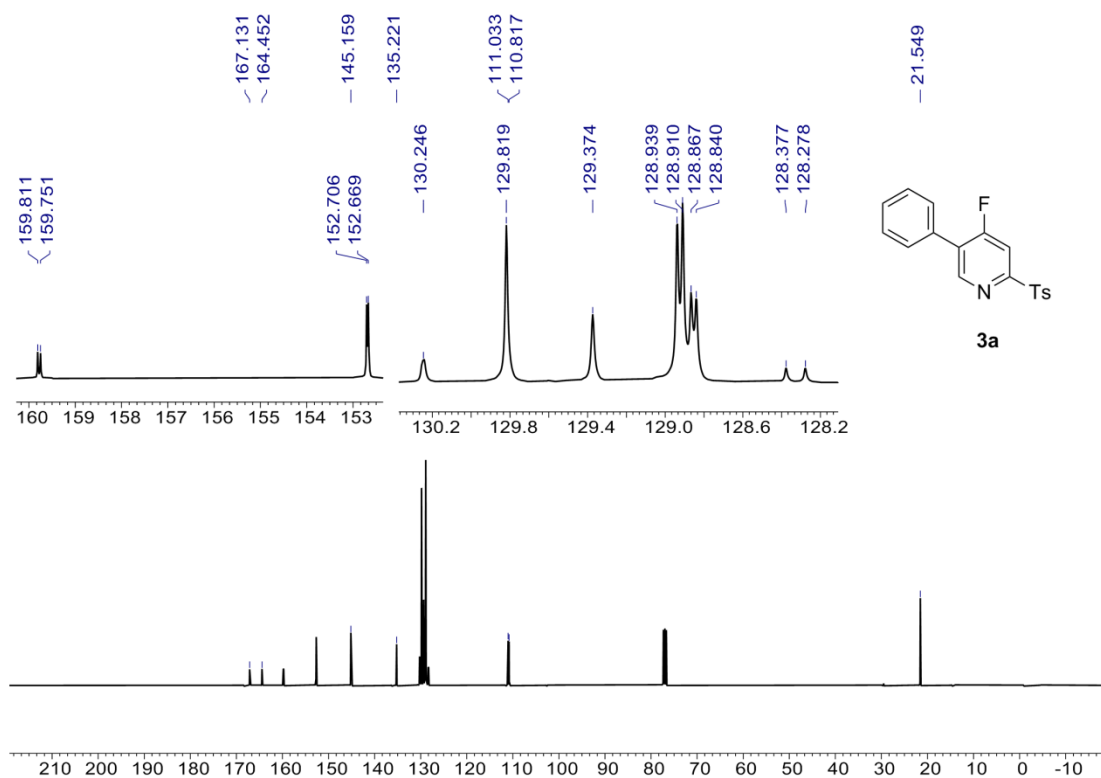

$^1\text{H}$  NMR (400 MHz,  $\text{CDCl}_3$ ) for **3b**

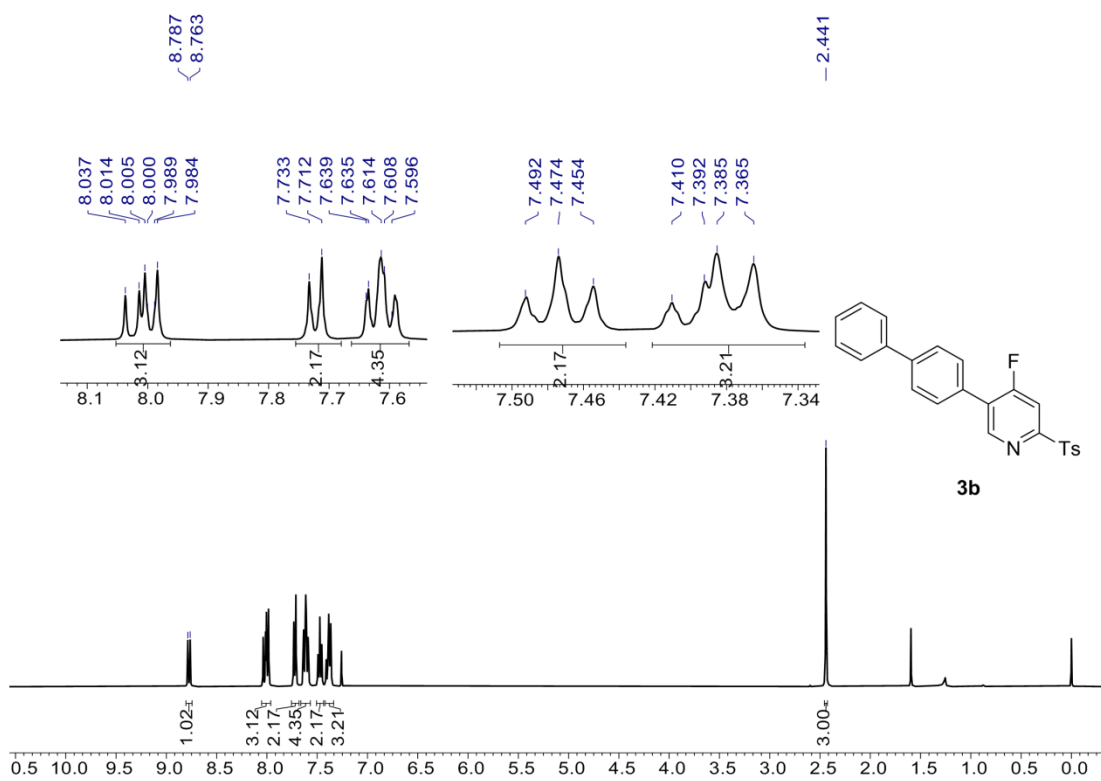

<sup>19</sup>F NMR (376 MHz, CDCl<sub>3</sub>) for **3b**

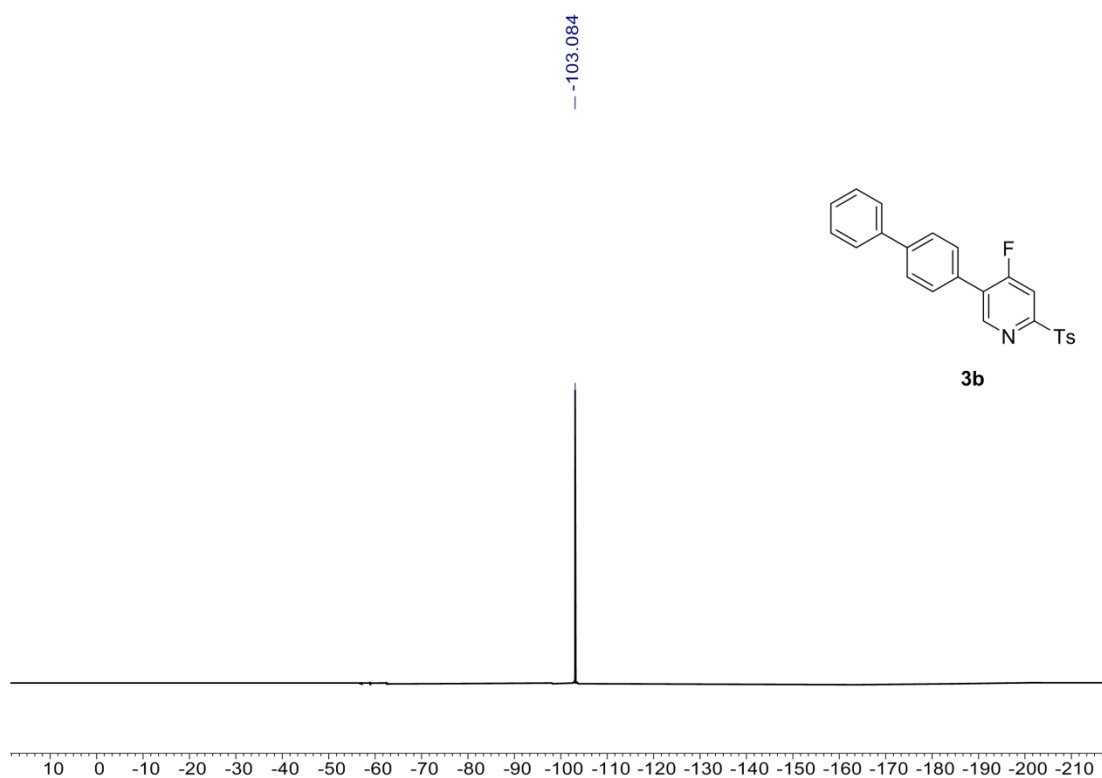

<sup>13</sup>C NMR (400 MHz, CDCl<sub>3</sub>) for **3b**

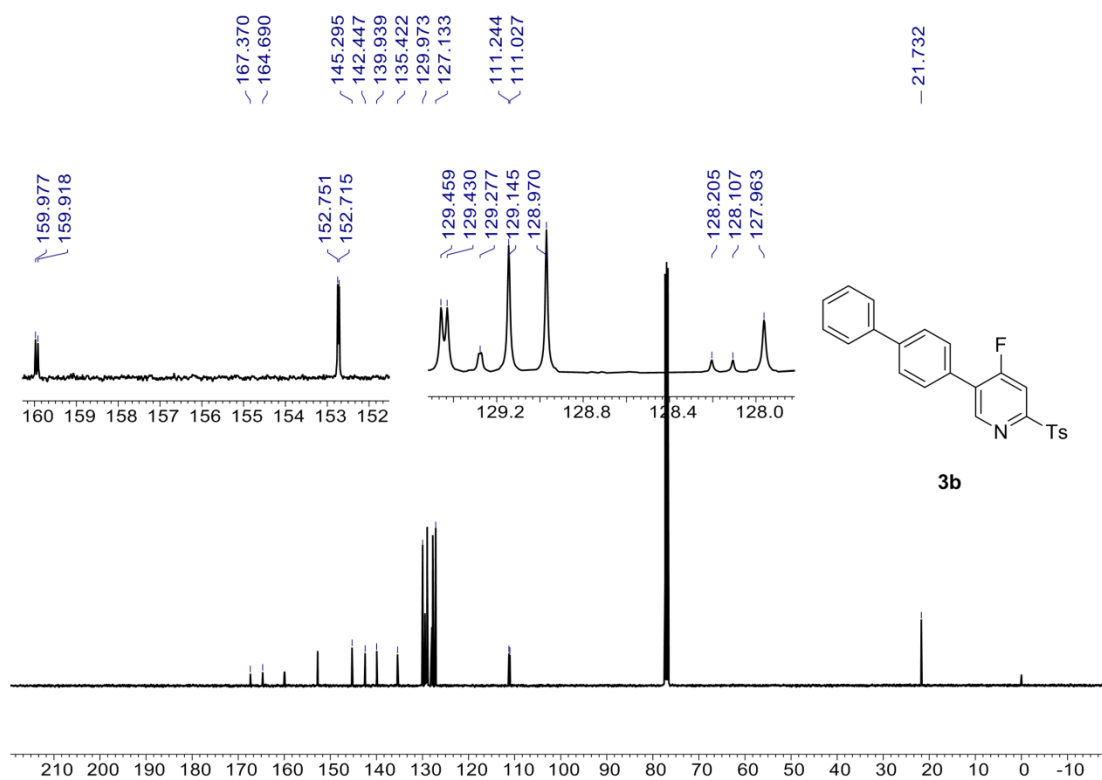

**<sup>1</sup>H NMR (400 MHz, CDCl<sub>3</sub>) for 3c**

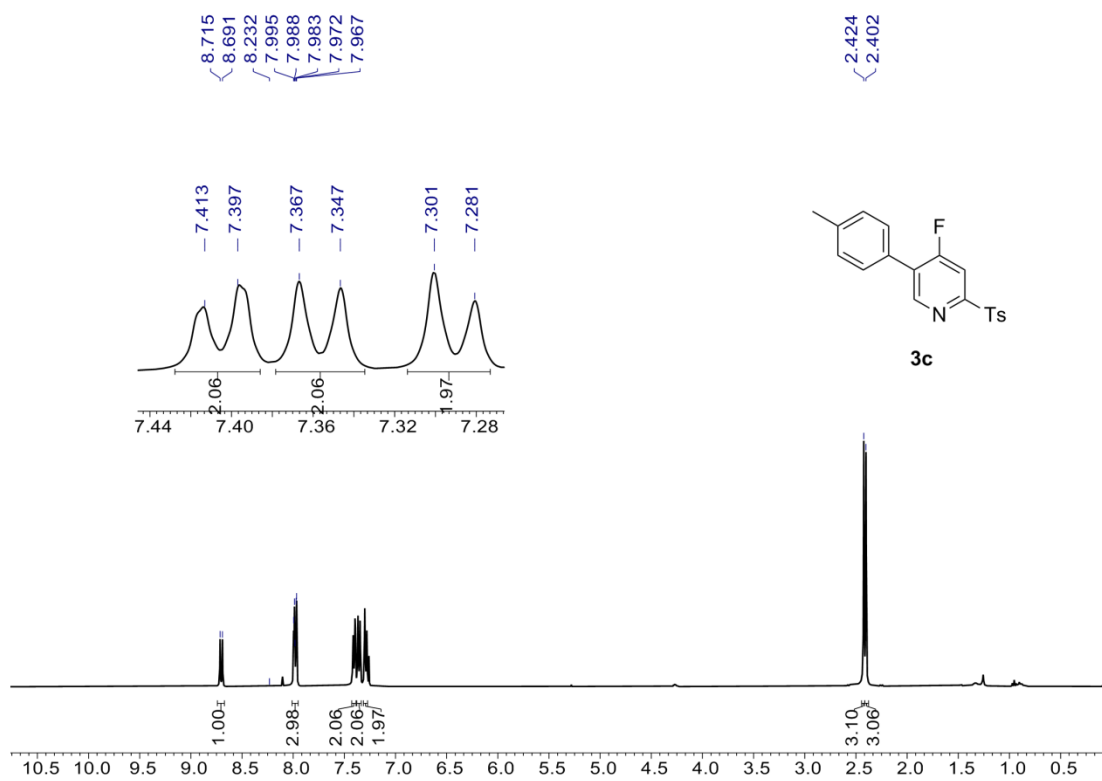

**<sup>19</sup>F NMR (376 MHz, CDCl<sub>3</sub>) for 3c**

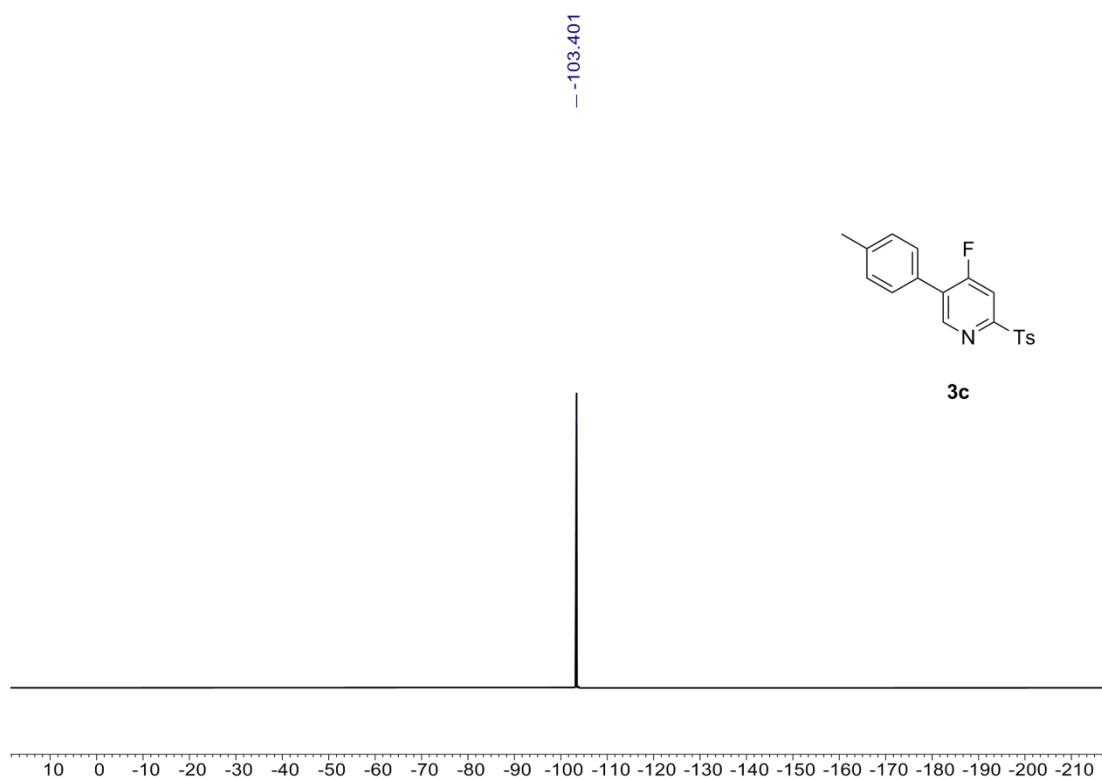

<sup>13</sup>C NMR (100 MHz, CDCl<sub>3</sub>) for **3c**

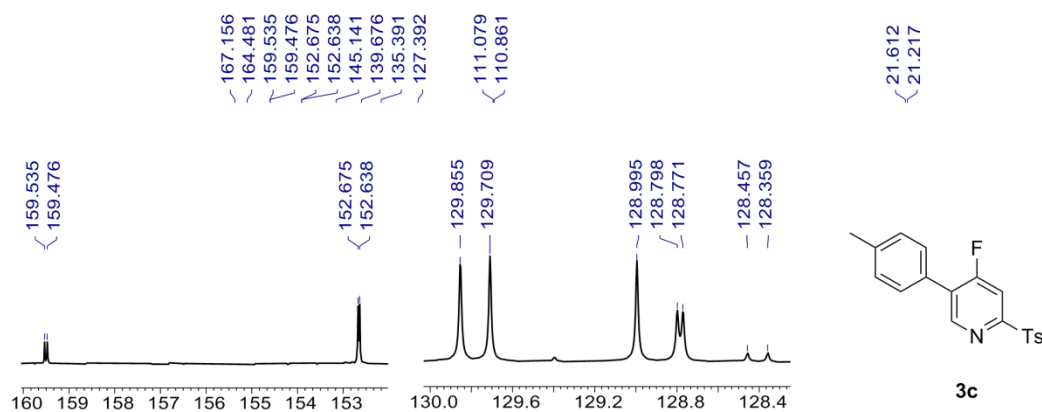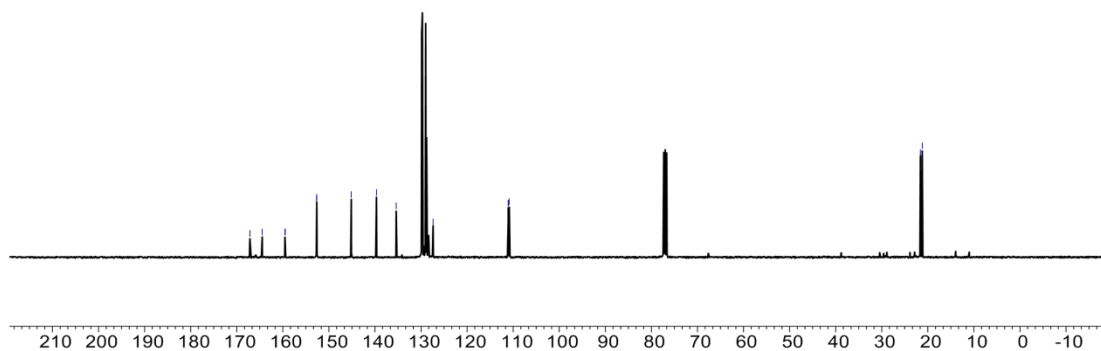

<sup>1</sup>H NMR (400 MHz, CDCl<sub>3</sub>) for **3d**

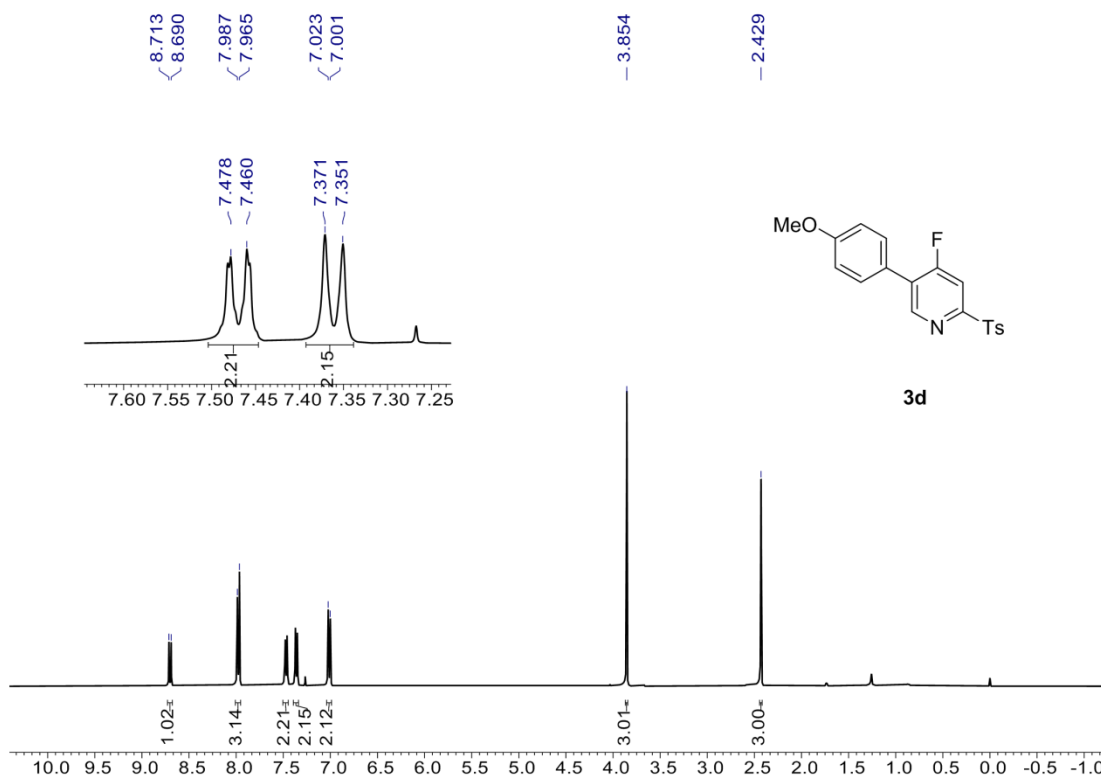

<sup>19</sup>F NMR (376 MHz, CDCl<sub>3</sub>) for **3d**

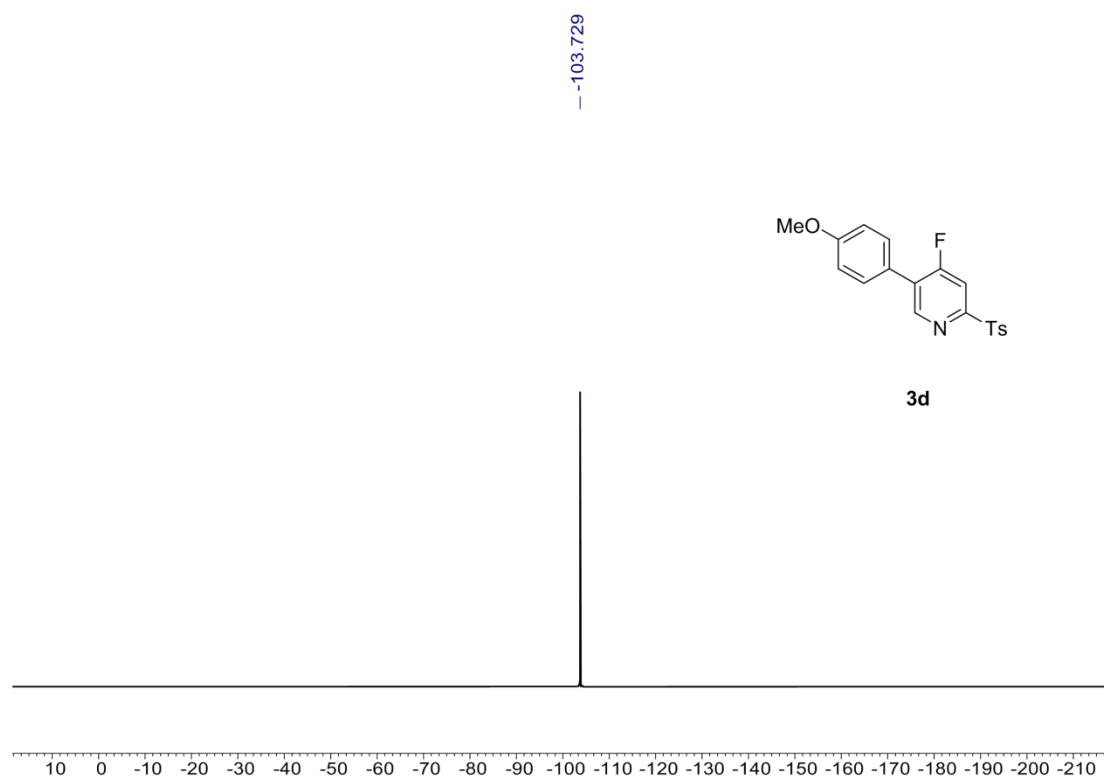

<sup>13</sup>C NMR (100 MHz, CDCl<sub>3</sub>) for **3d**

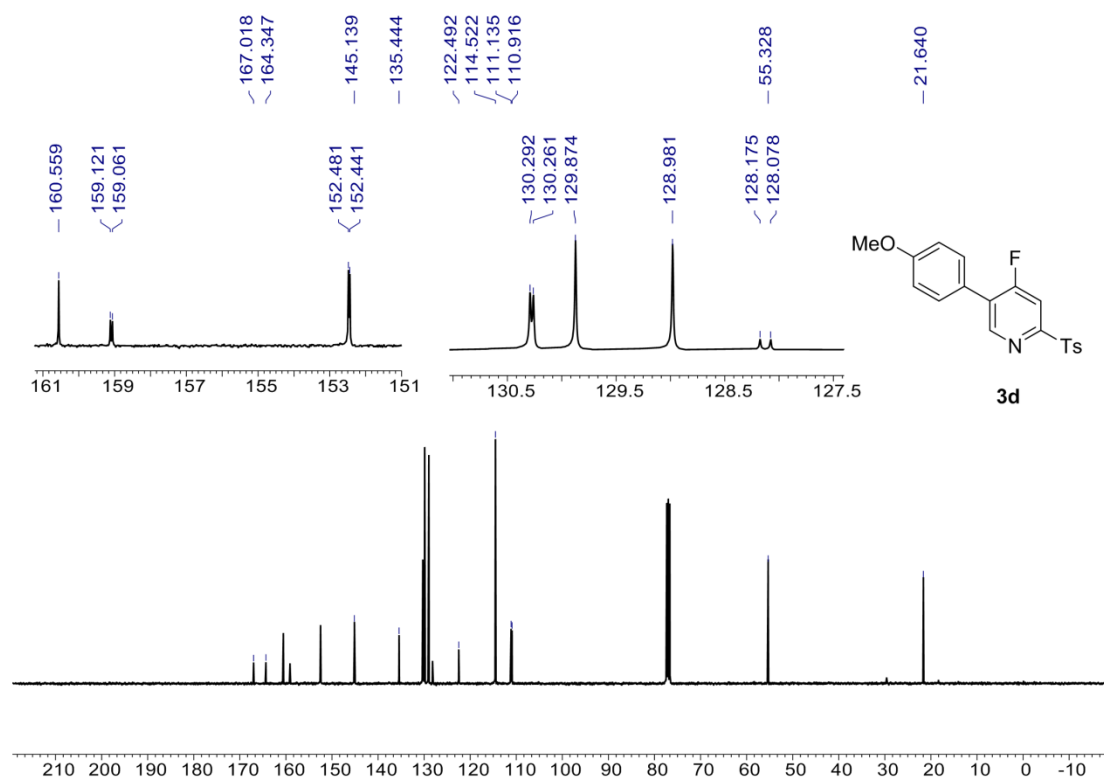



**<sup>1</sup>H NMR (400 MHz, CDCl<sub>3</sub>) for 3e**

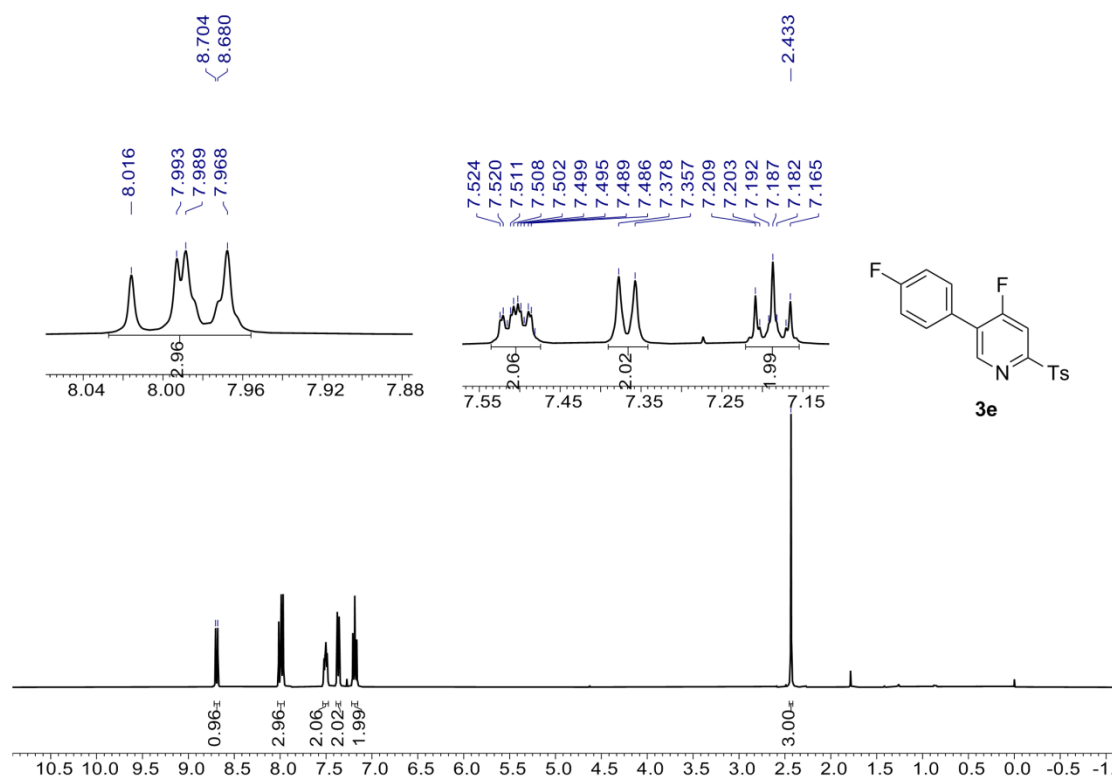

**<sup>19</sup>F NMR (376 MHz, CDCl<sub>3</sub>) for 3e**

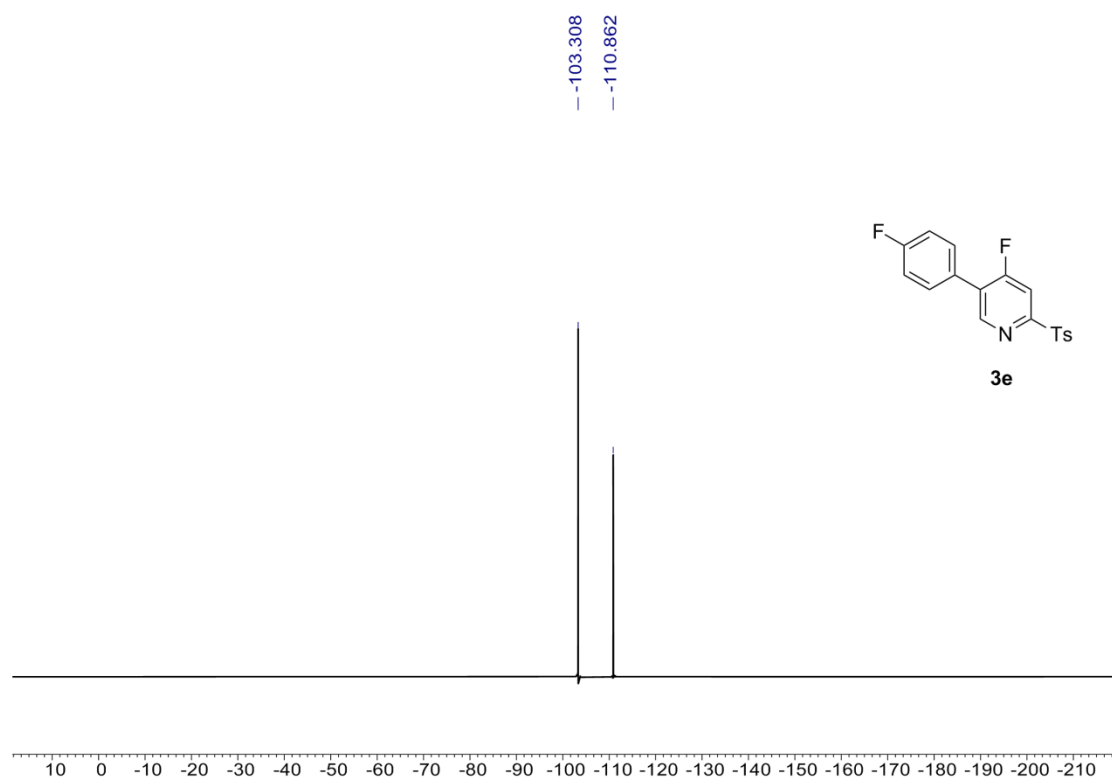

$^{13}\text{C}$  NMR (100 MHz,  $\text{CDCl}_3$ ) for **3e**

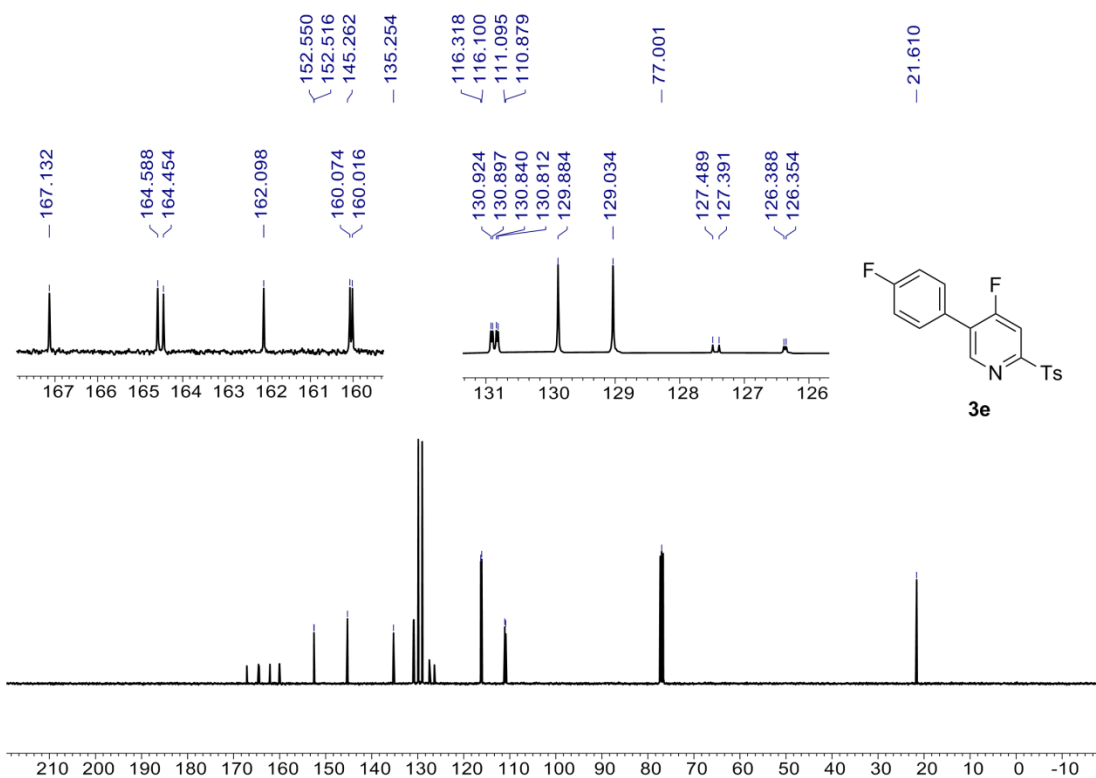

$^1\text{H}$  NMR (400 MHz,  $\text{CDCl}_3$ ) for **3f**

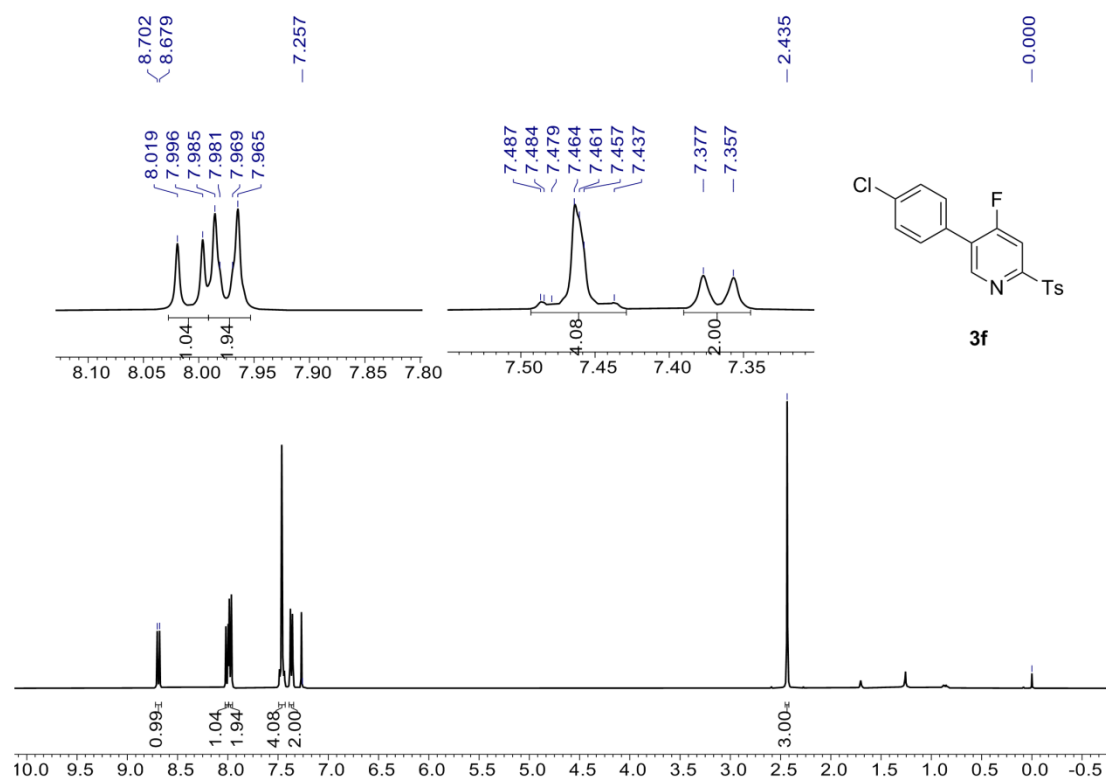

<sup>19</sup>F NMR (376 MHz, CDCl<sub>3</sub>) for **3f**

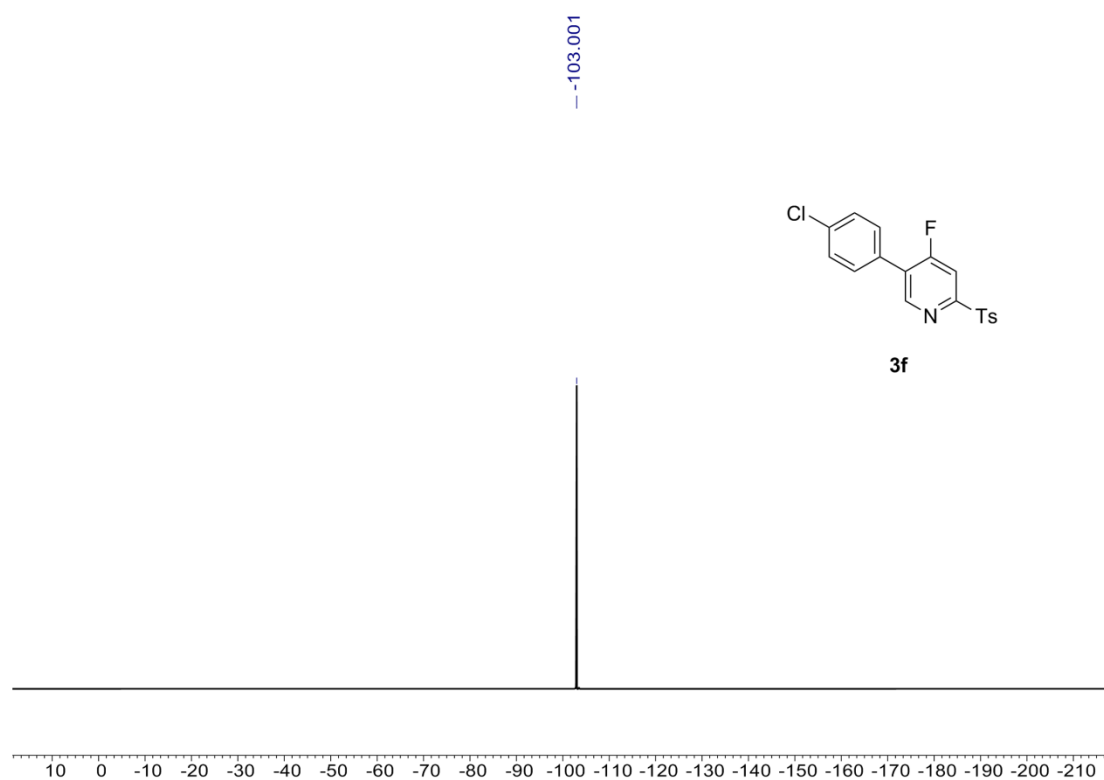

<sup>13</sup>C NMR (100 MHz, CDCl<sub>3</sub>) for **3f**

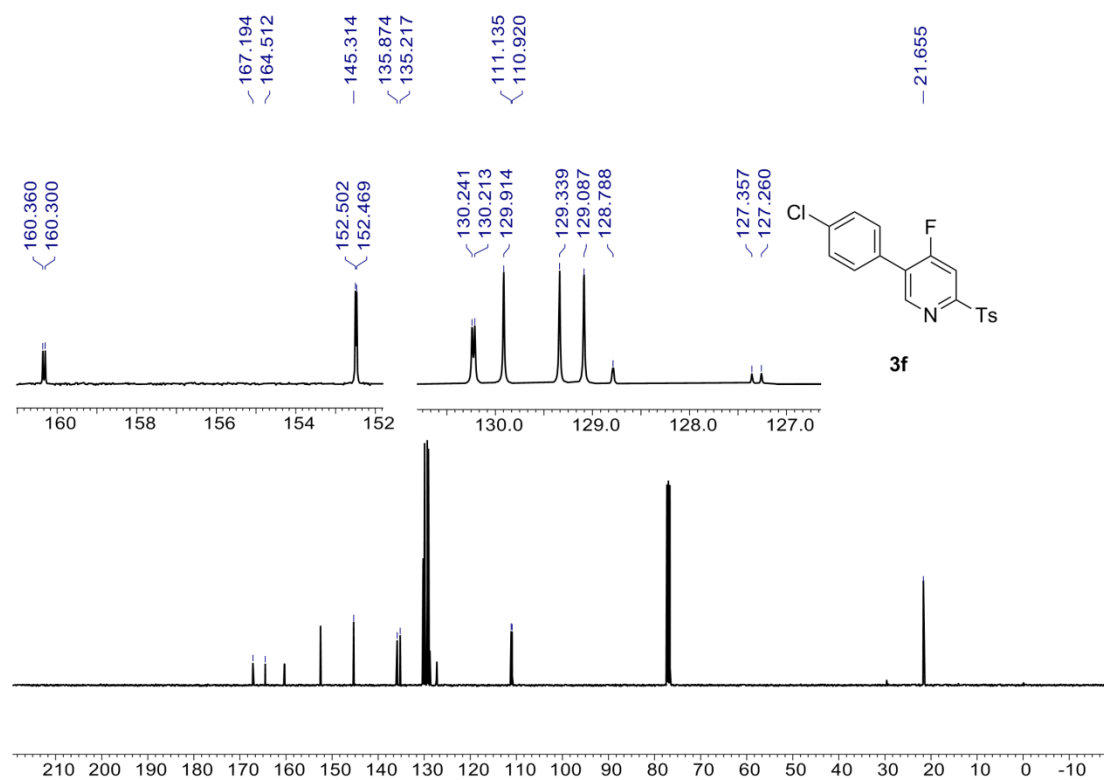

**$^1\text{H}$  NMR (400 MHz,  $\text{CDCl}_3$ ) for **3g****

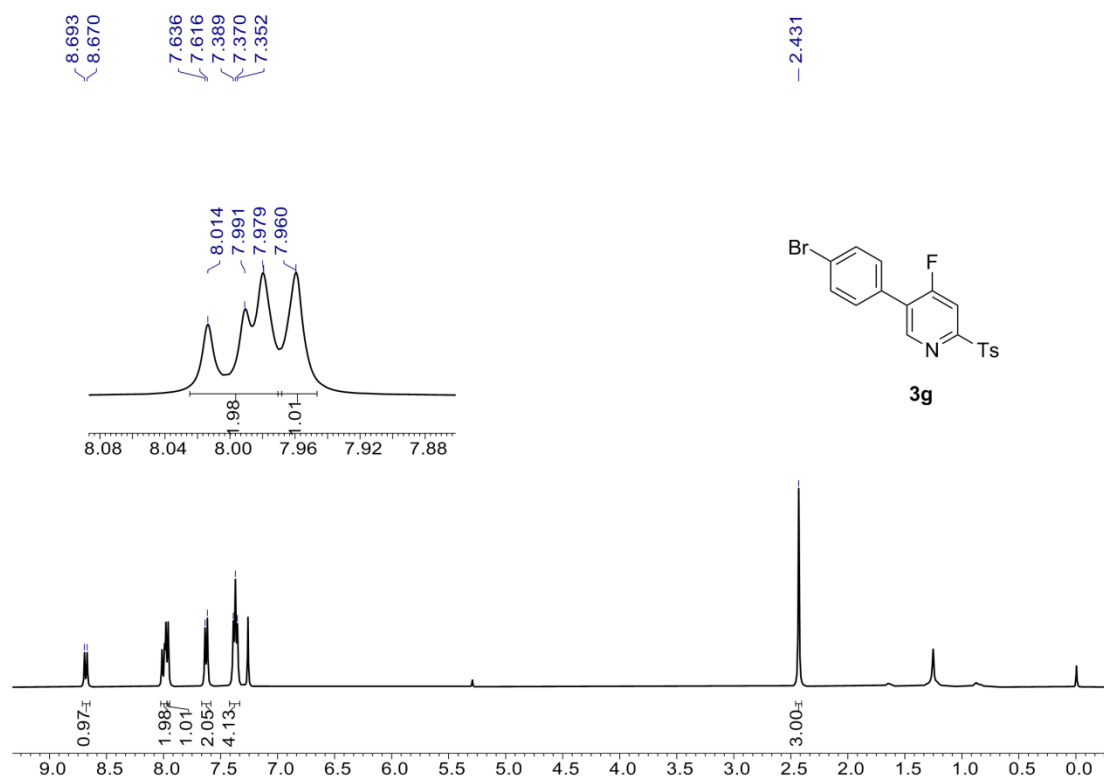

**$^{19}\text{F}$  NMR (376 MHz,  $\text{CDCl}_3$ ) for **3g****

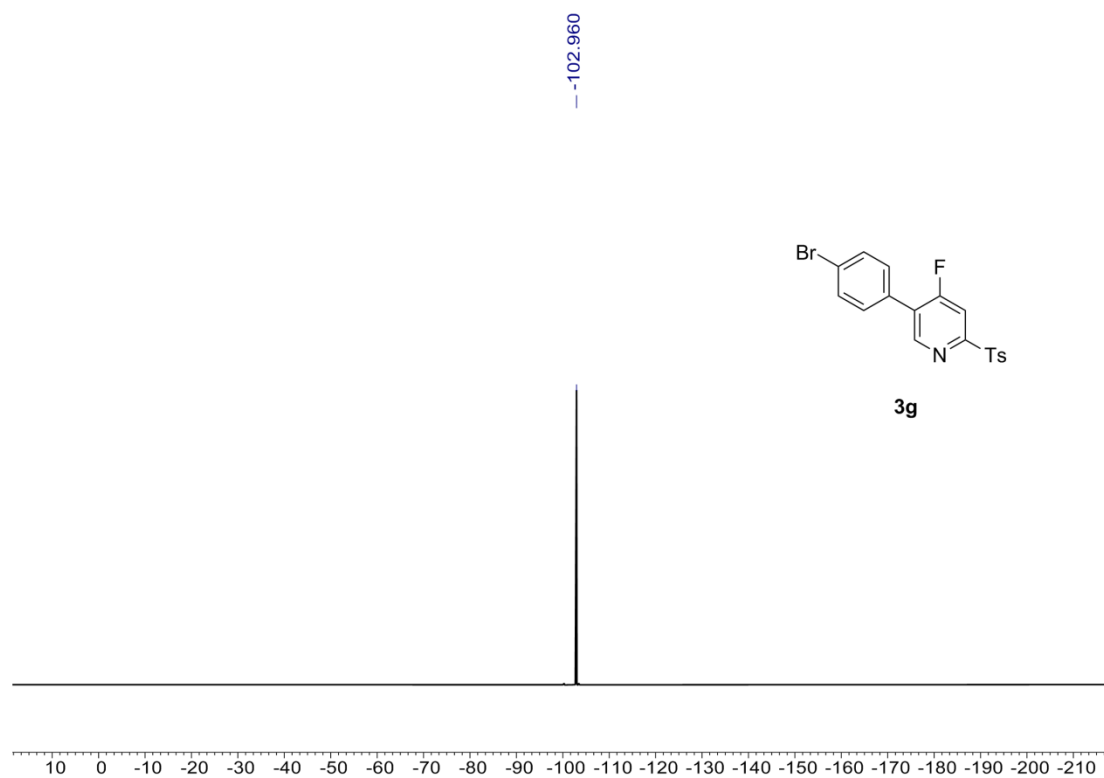

$^{13}\text{C}$  NMR (100 MHz,  $\text{CDCl}_3$ ) for **3g**

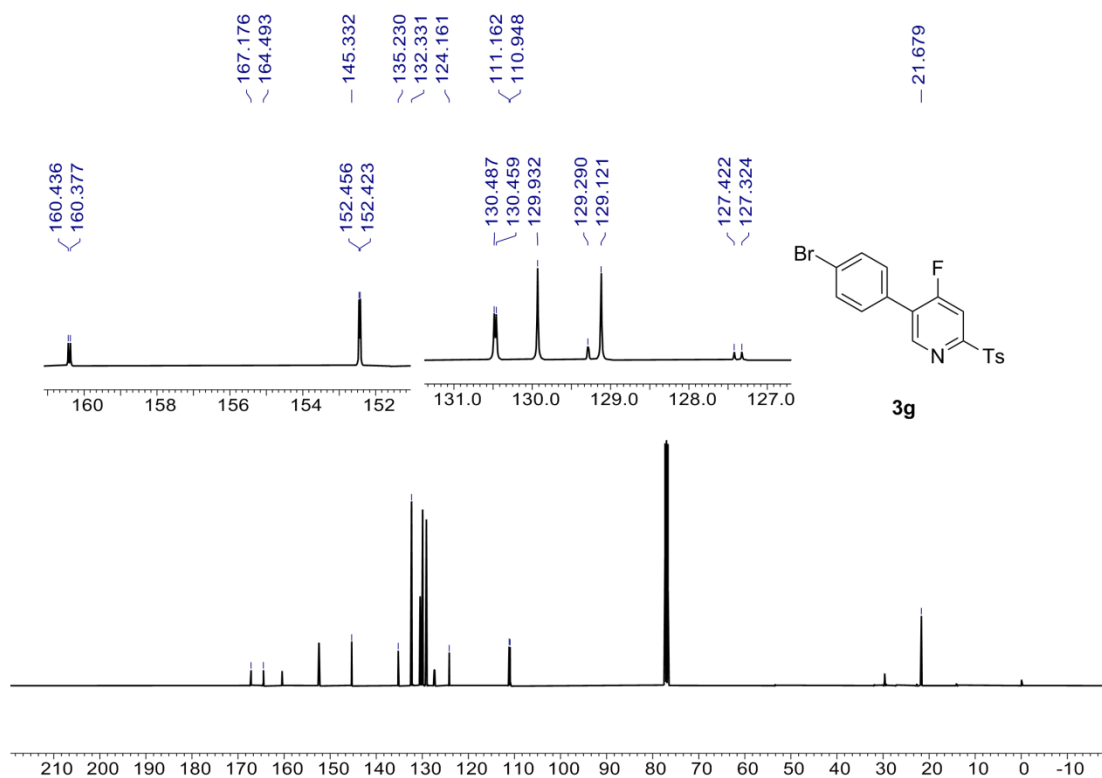

$^1\text{H}$  NMR (400 MHz,  $\text{CDCl}_3$ ) for **3h**

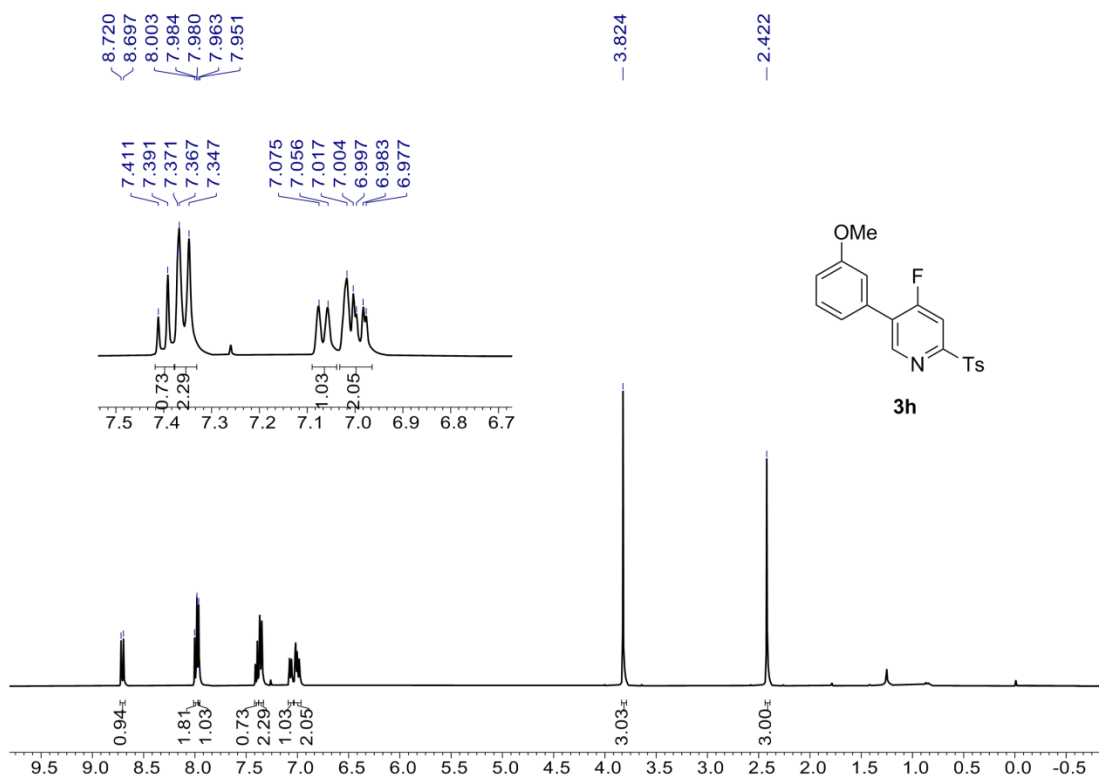

<sup>19</sup>F NMR (376 MHz, CDCl<sub>3</sub>) for **3h**

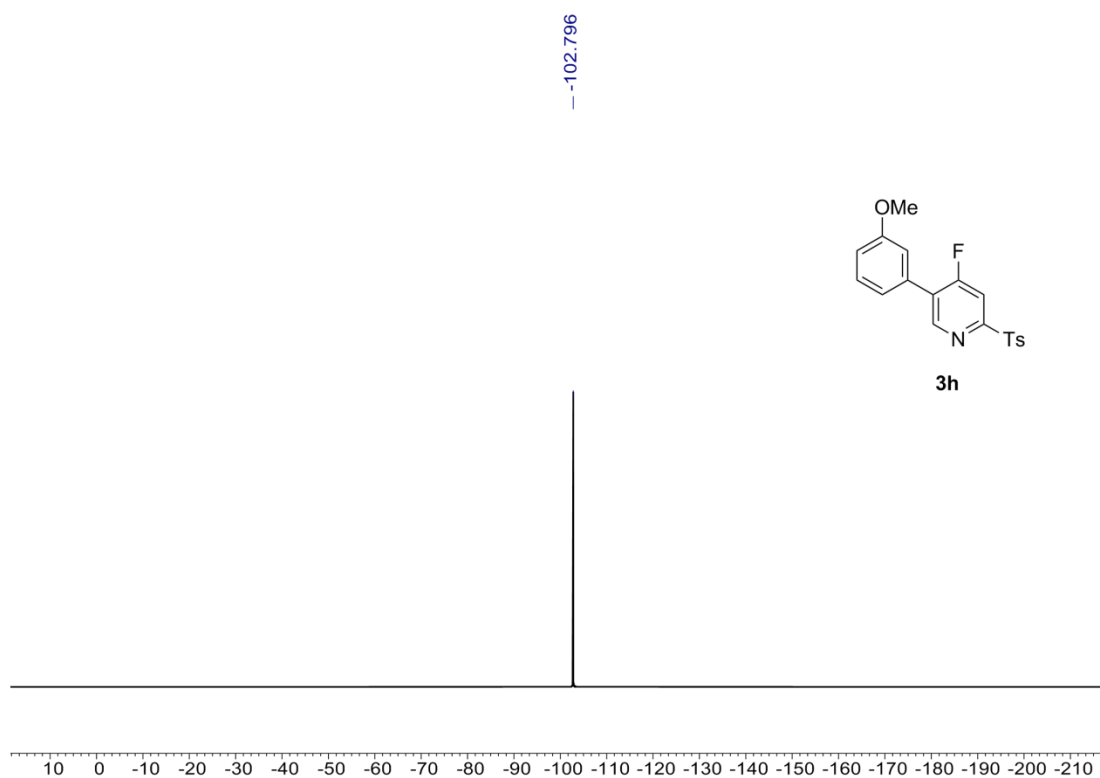

<sup>13</sup>C NMR (100 MHz, CDCl<sub>3</sub>) for **3h**

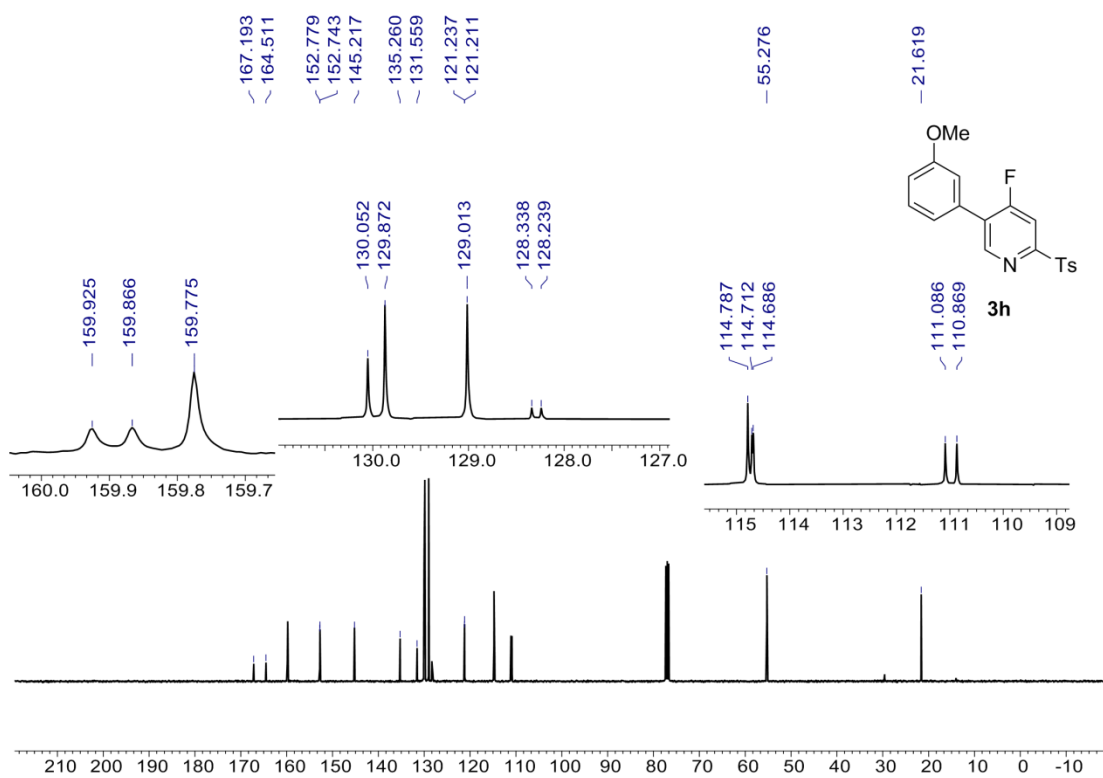

**<sup>1</sup>H NMR (400 MHz, CDCl<sub>3</sub>) for 3i**

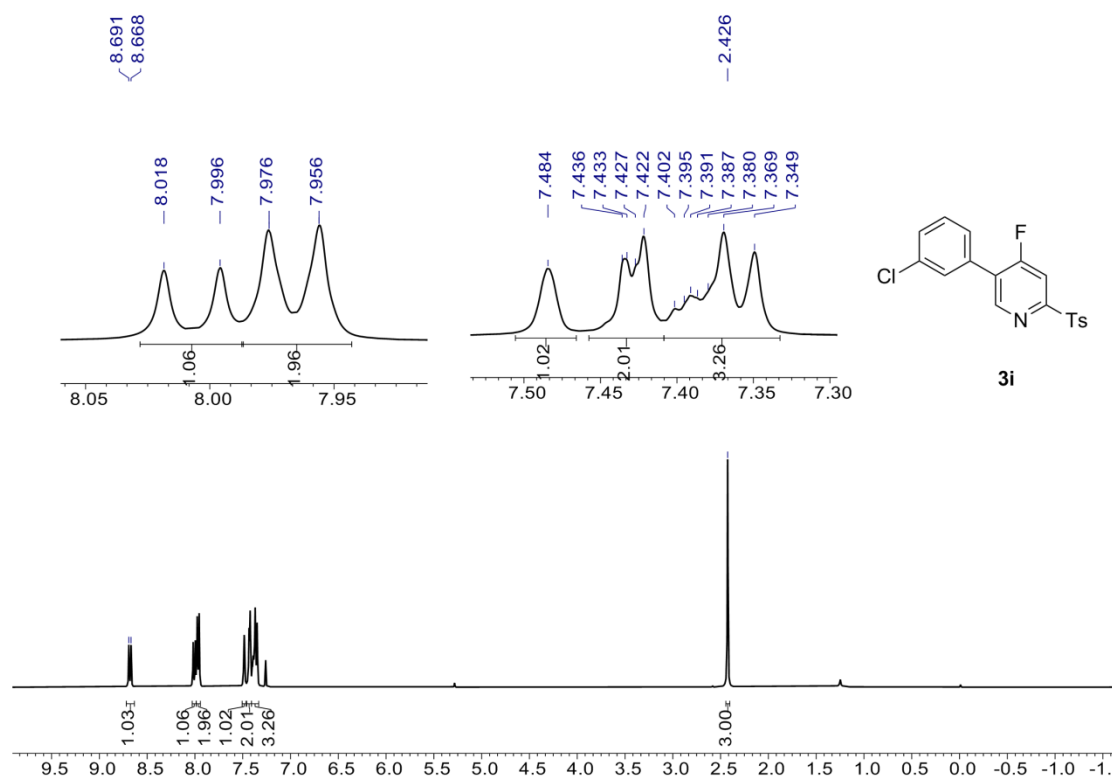

**<sup>19</sup>F NMR (376 MHz, CDCl<sub>3</sub>) for 3i**

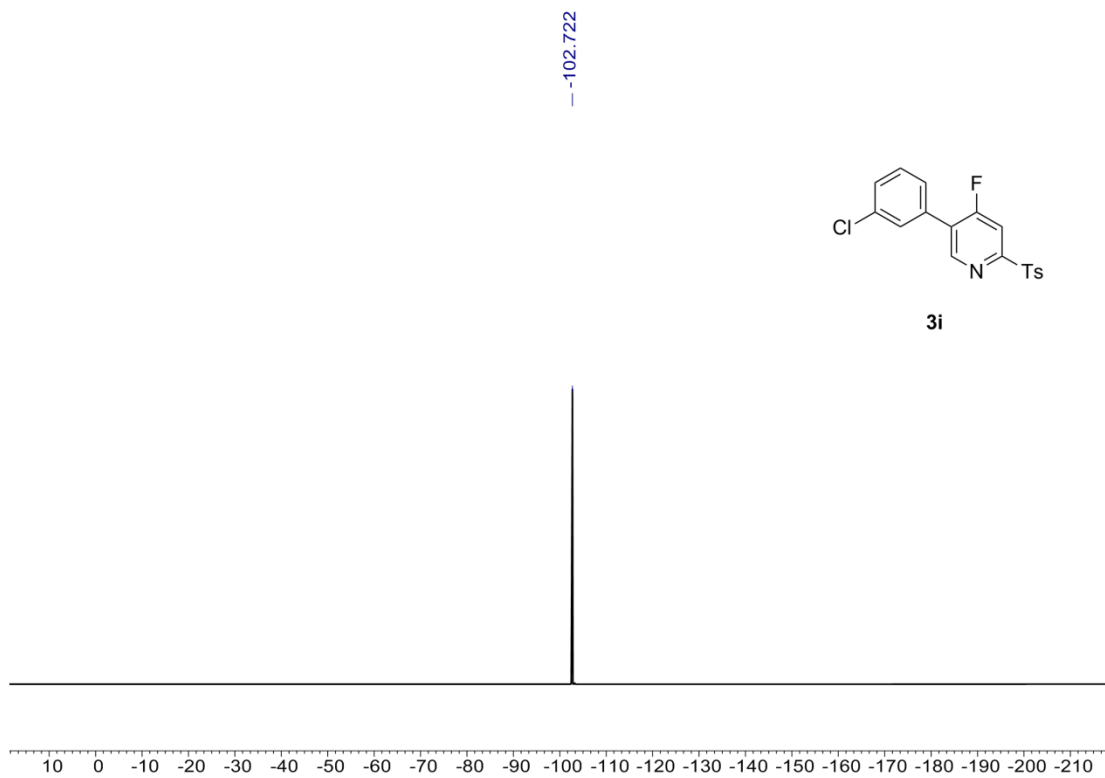

$^{13}\text{C}$  NMR (100 MHz,  $\text{CDCl}_3$ ) for **3i**

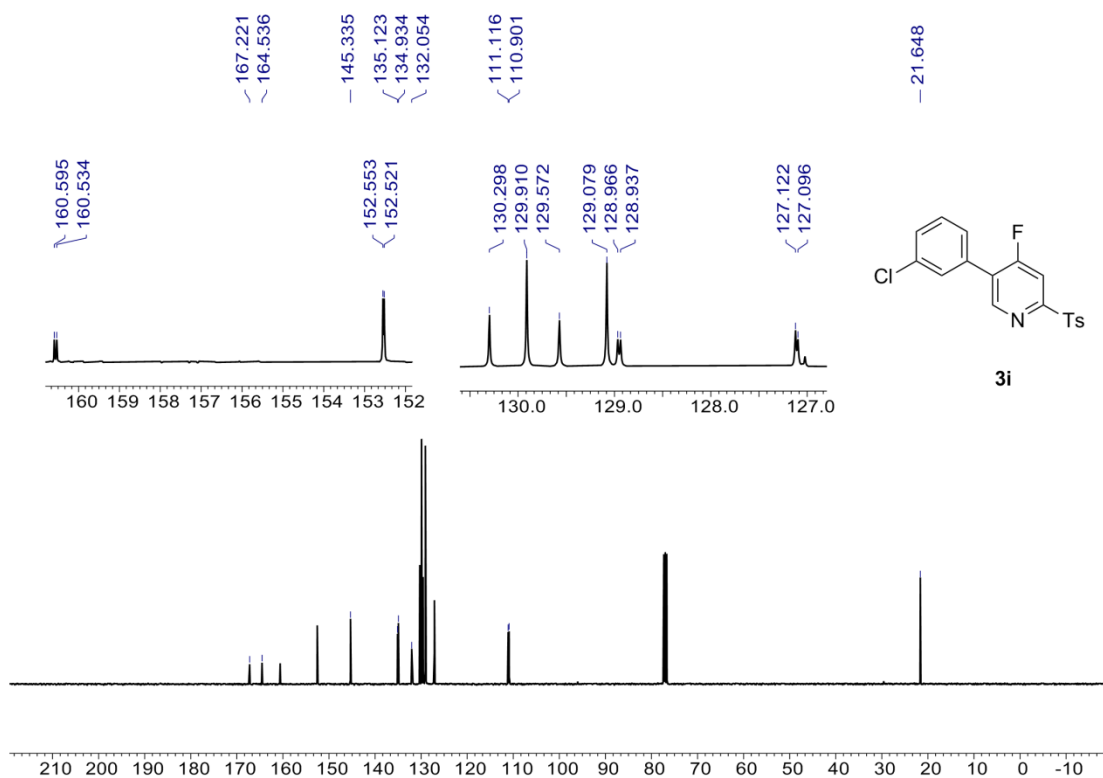

$^1\text{H}$  NMR (400 MHz,  $\text{CDCl}_3$ ) for **3j**

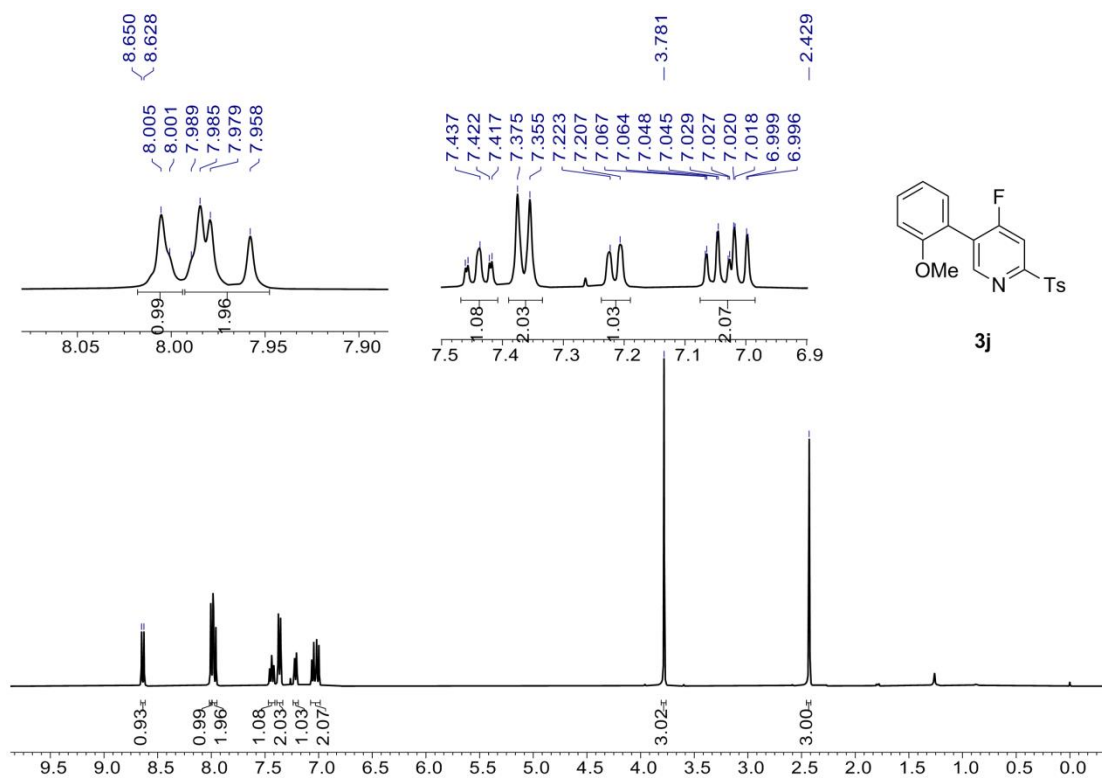



<sup>19</sup>F NMR (376 MHz, CDCl<sub>3</sub>) for **3j**

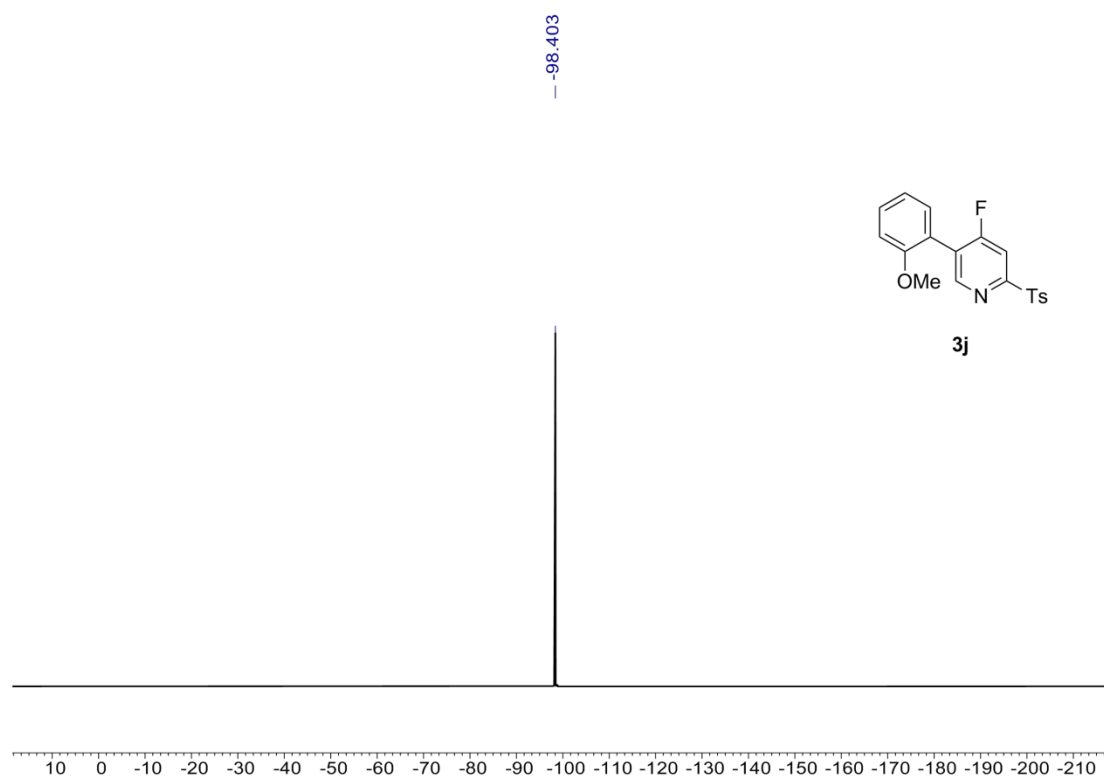

<sup>13</sup>C NMR (100 MHz, CDCl<sub>3</sub>) for **3j**

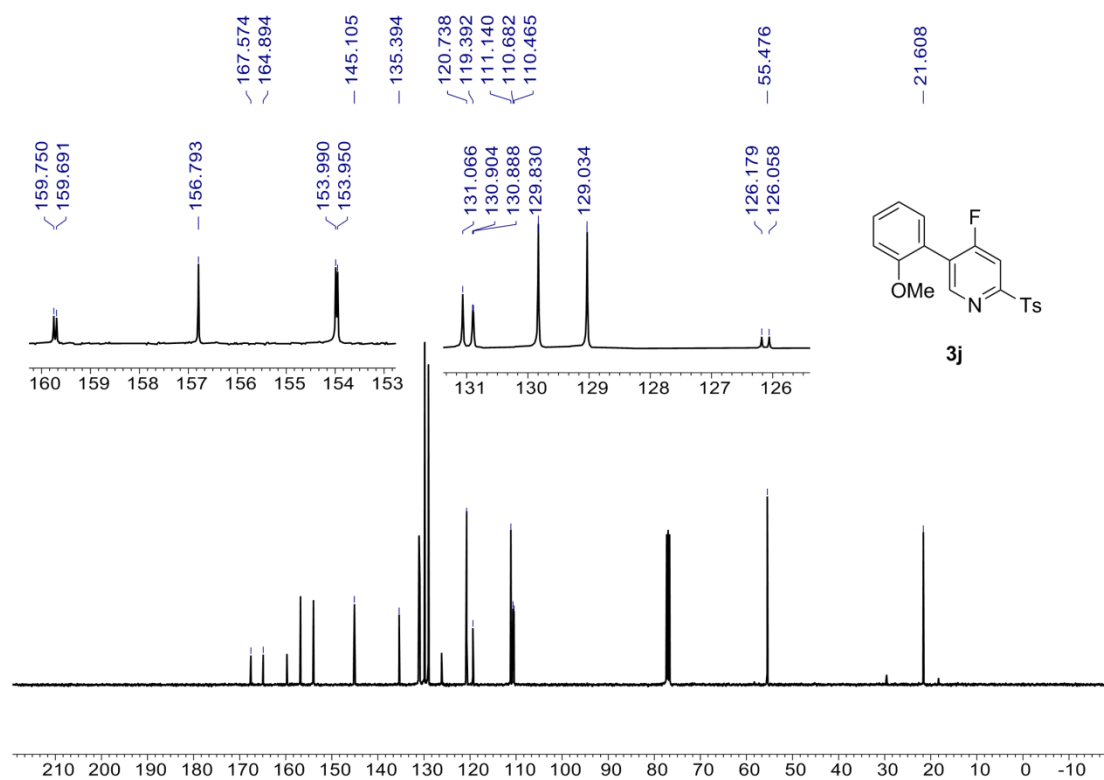

**<sup>1</sup>H NMR (400 MHz, CDCl<sub>3</sub>) for 3k**

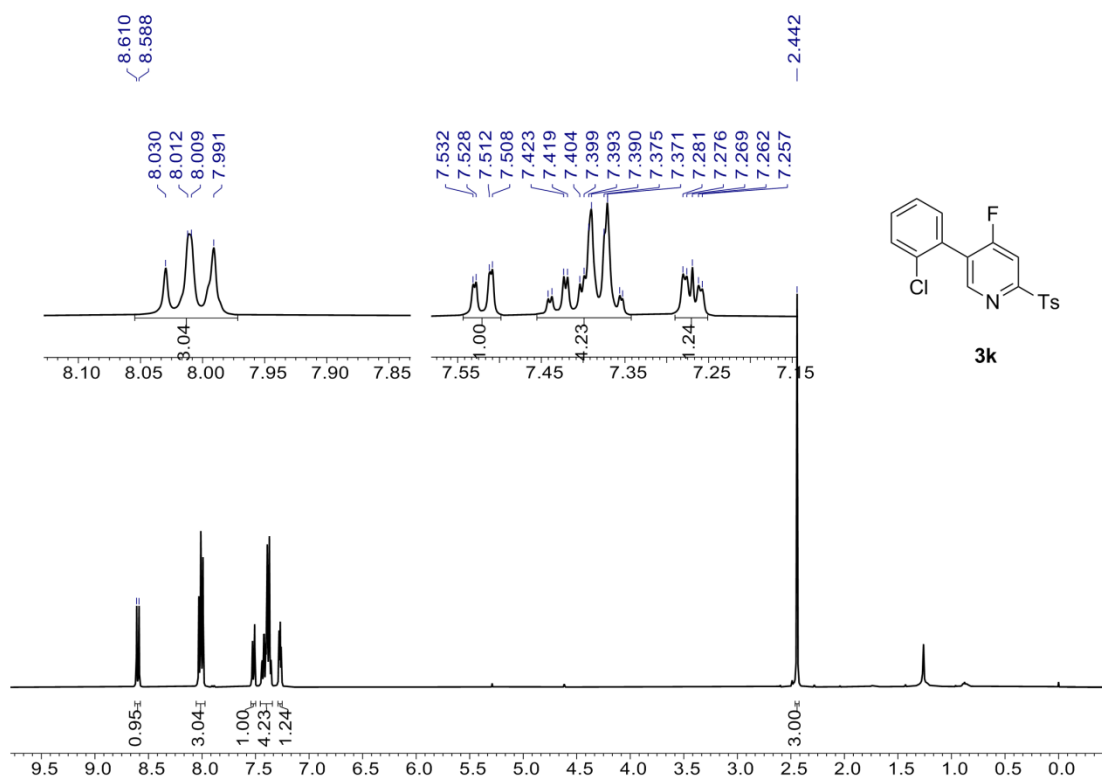

**<sup>19</sup>F NMR (376 MHz, CDCl<sub>3</sub>) for 3k**

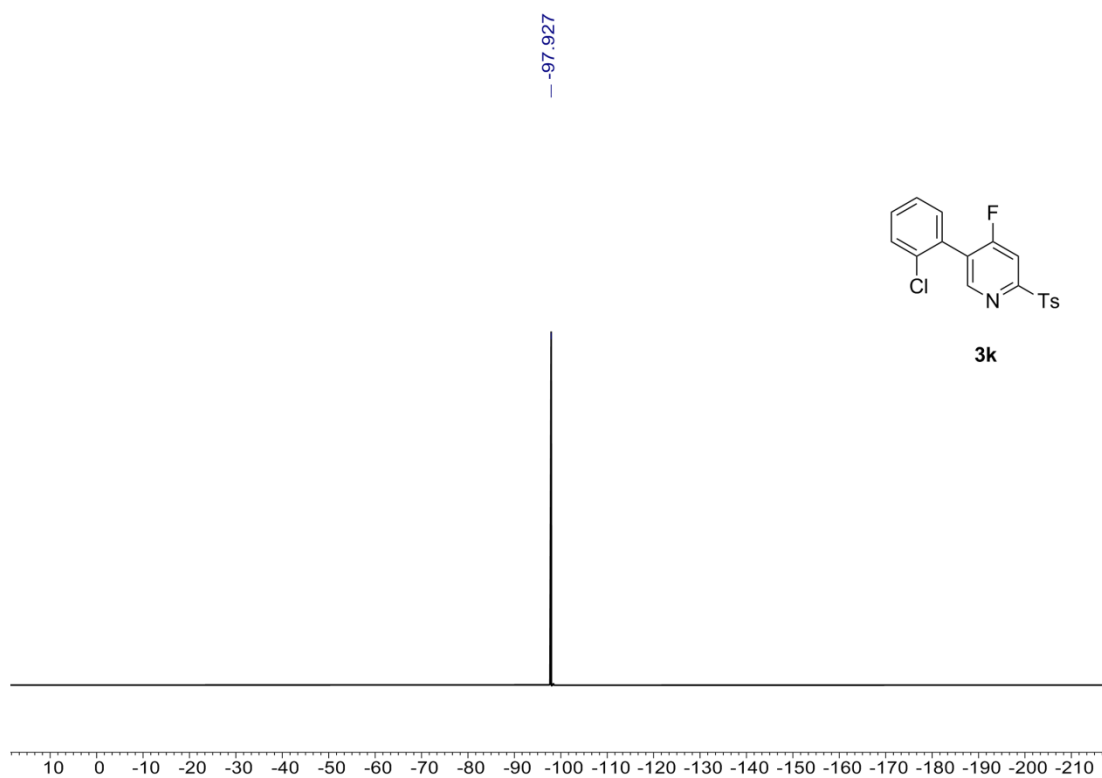

$^{13}\text{C}$  NMR (100 MHz,  $\text{CDCl}_3$ ) for **3k**

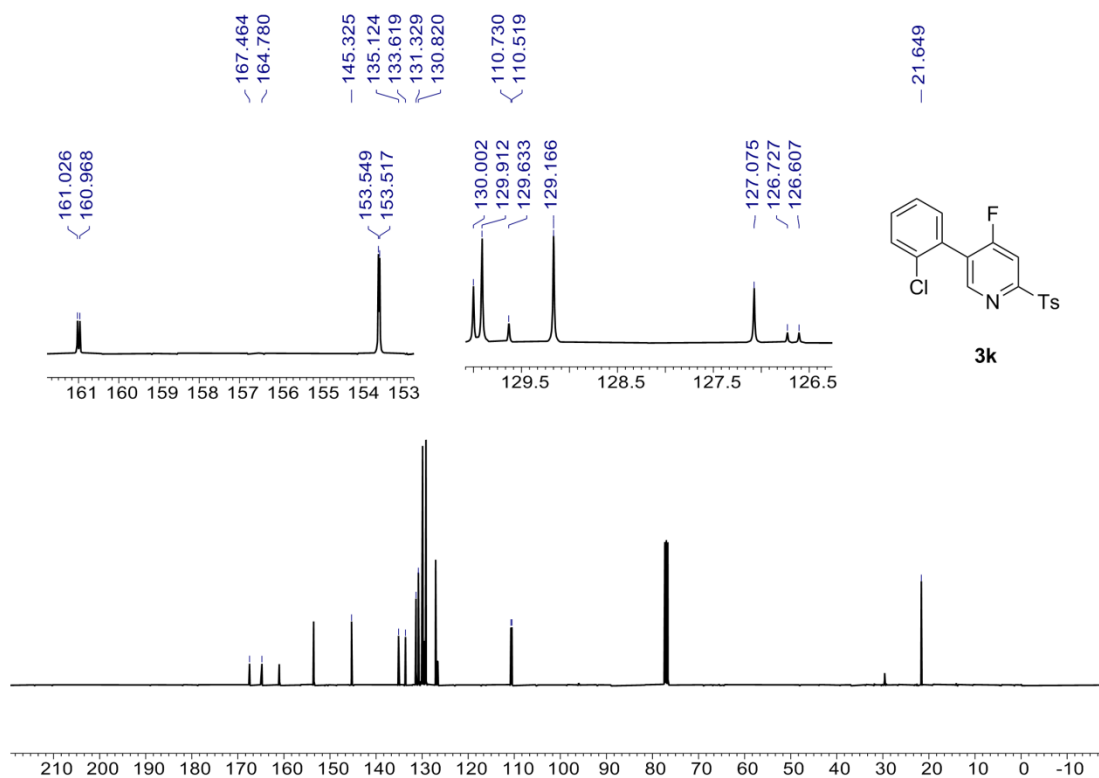

$^1\text{H}$  NMR (400 MHz,  $\text{CDCl}_3$ ) for **3l**

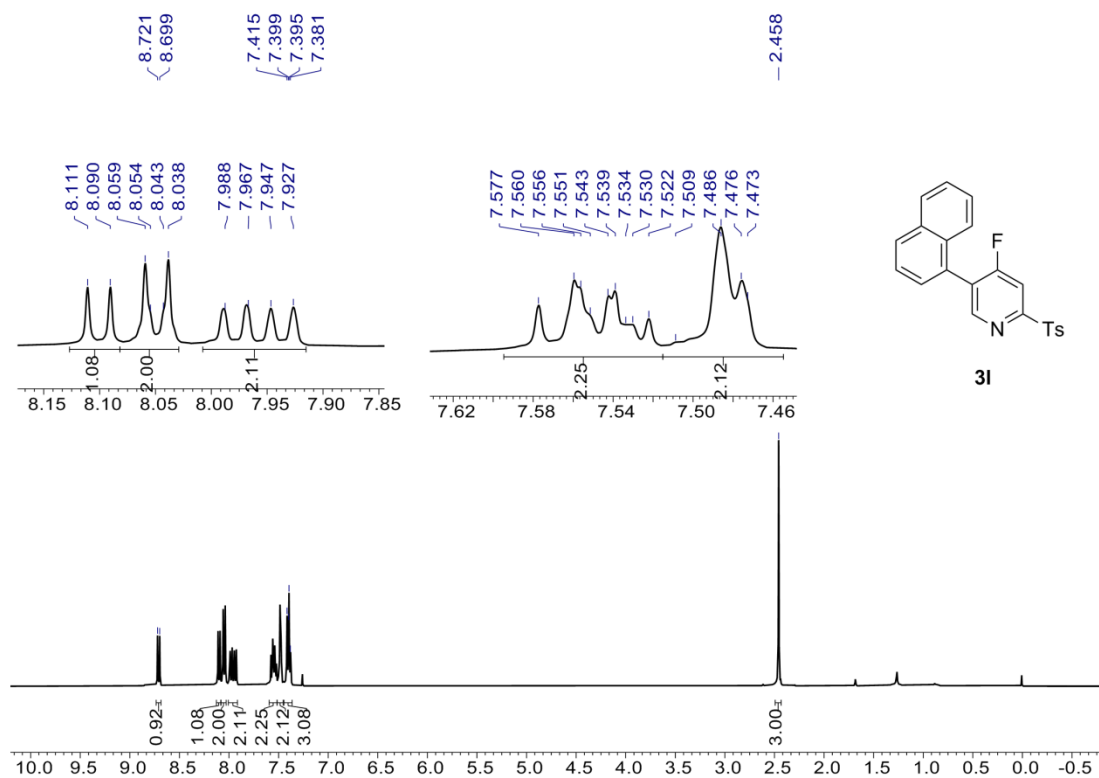

**<sup>19</sup>F NMR (376 MHz, CDCl<sub>3</sub>) for 3I**

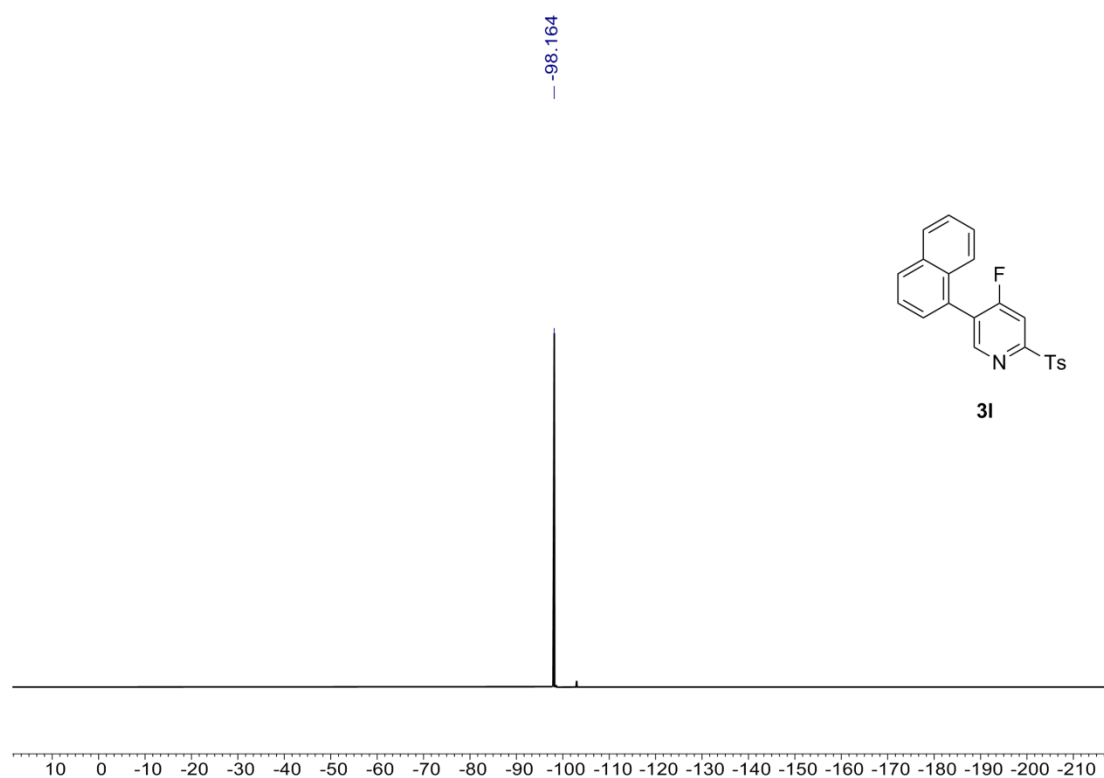

**<sup>13</sup>C NMR (100 MHz, CDCl<sub>3</sub>) for 3I**

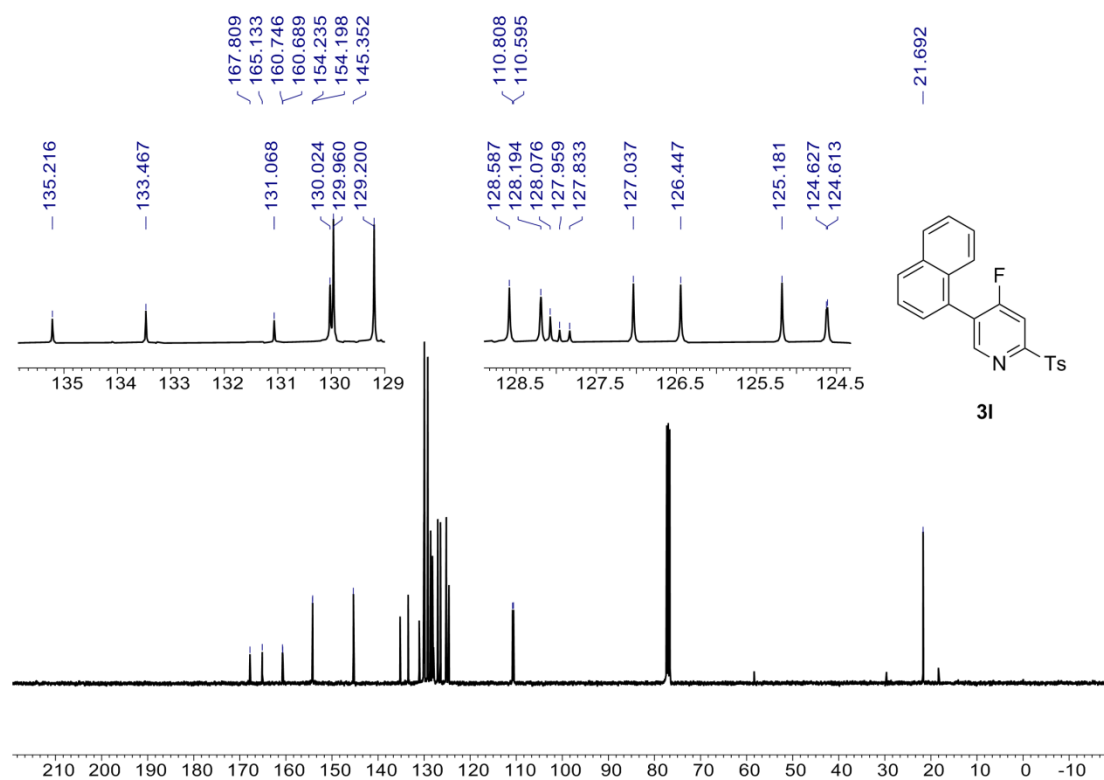

**<sup>1</sup>H NMR (400 MHz, CDCl<sub>3</sub>) for 3m**

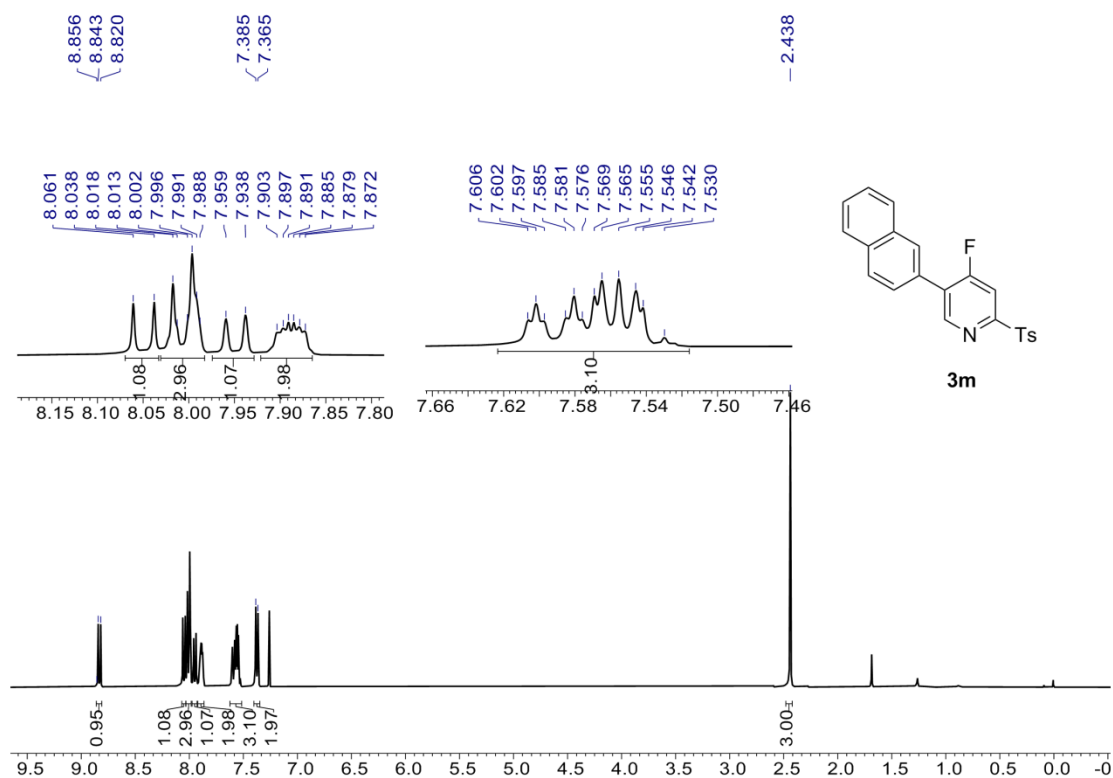

**<sup>19</sup>F NMR (376 MHz, CDCl<sub>3</sub>) for 3m**

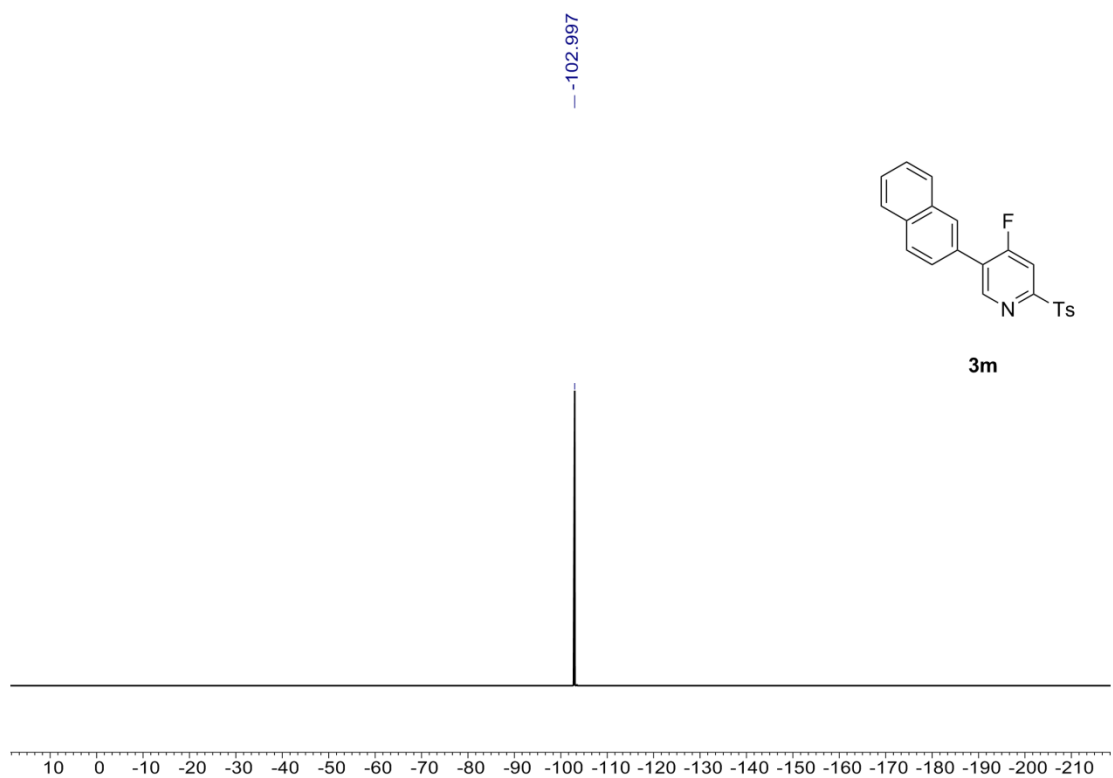

$^{13}\text{C}$  NMR (100 MHz,  $\text{CDCl}_3$ ) for **3m**

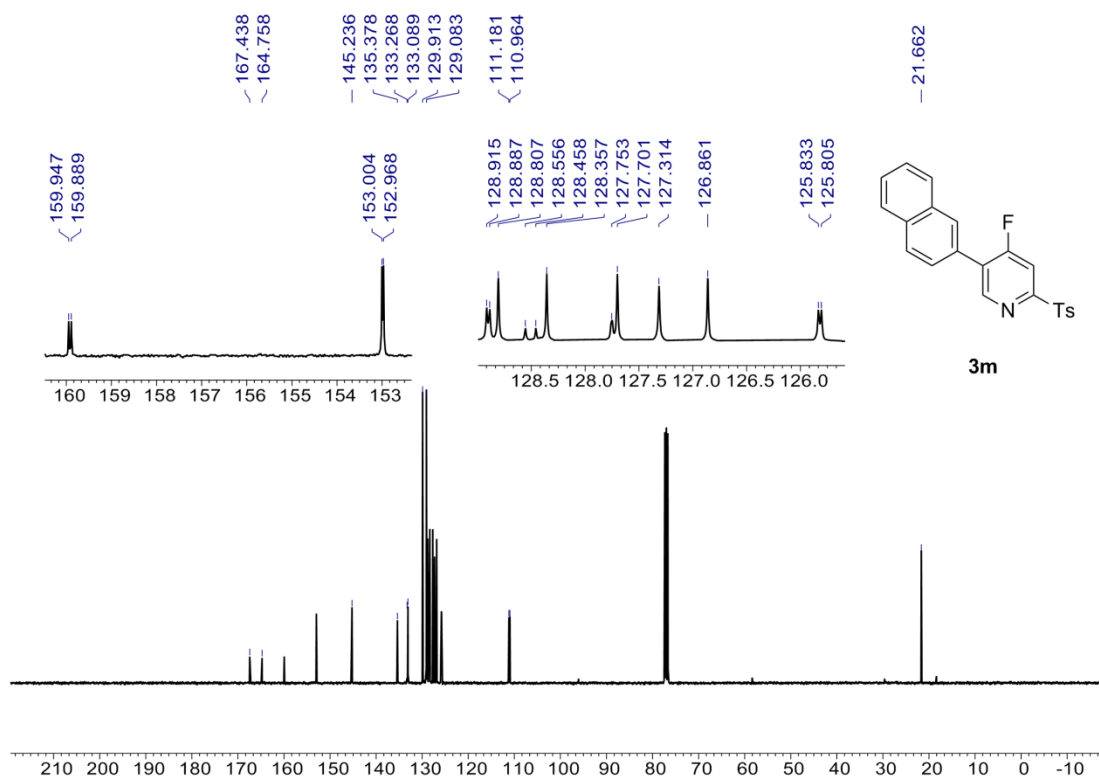

$^1\text{H}$  NMR (400 MHz,  $\text{CDCl}_3$ ) for **3n**

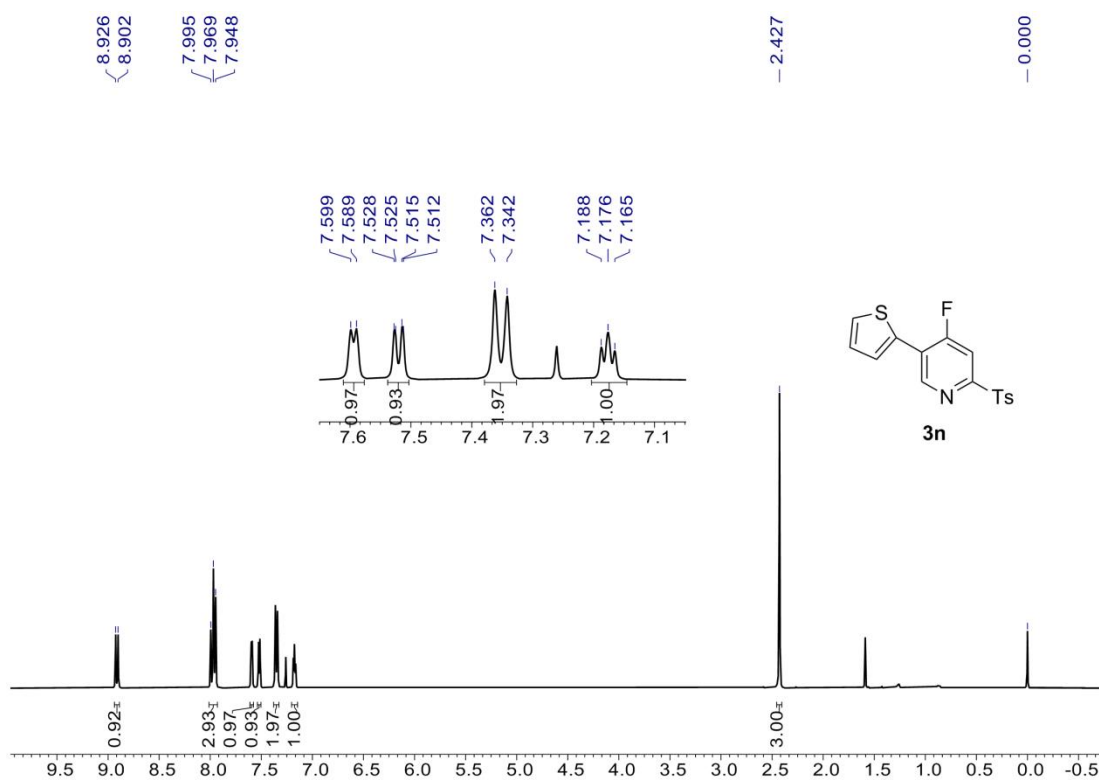

<sup>19</sup>F NMR (376 MHz, CDCl<sub>3</sub>) for **3n**

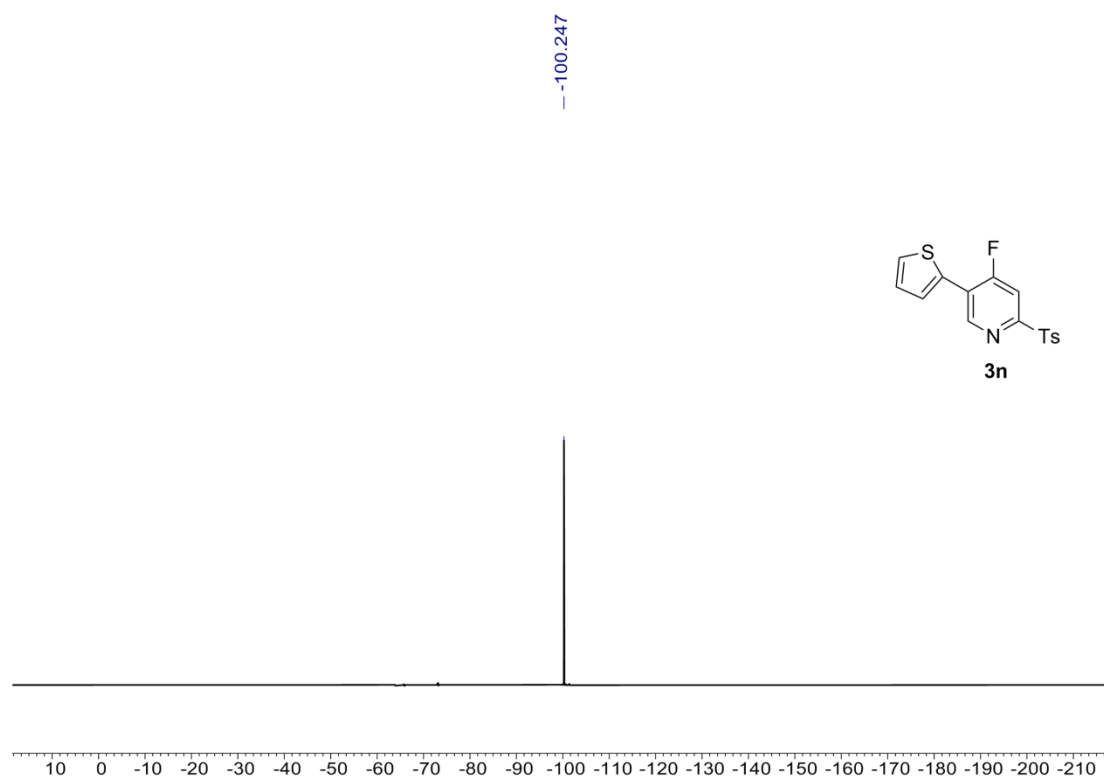

<sup>13</sup>C NMR (100 MHz, CDCl<sub>3</sub>) for **3n**

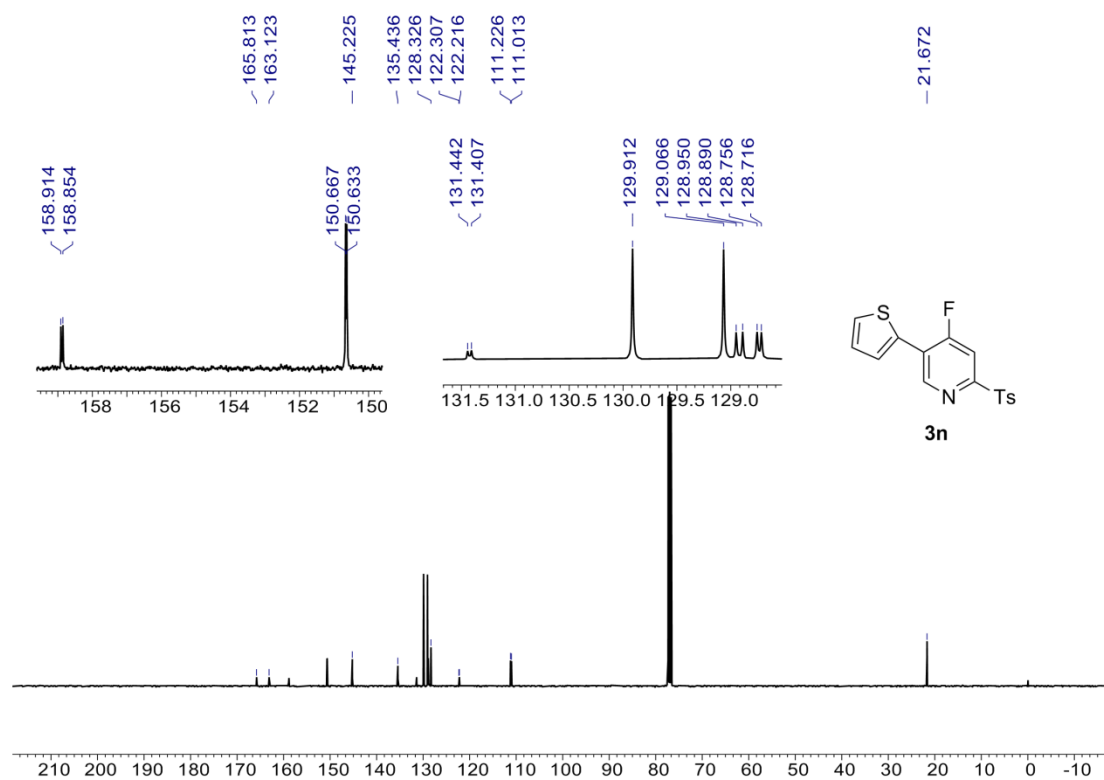

**<sup>1</sup>H NMR (400 MHz, CDCl<sub>3</sub>) for 3o**

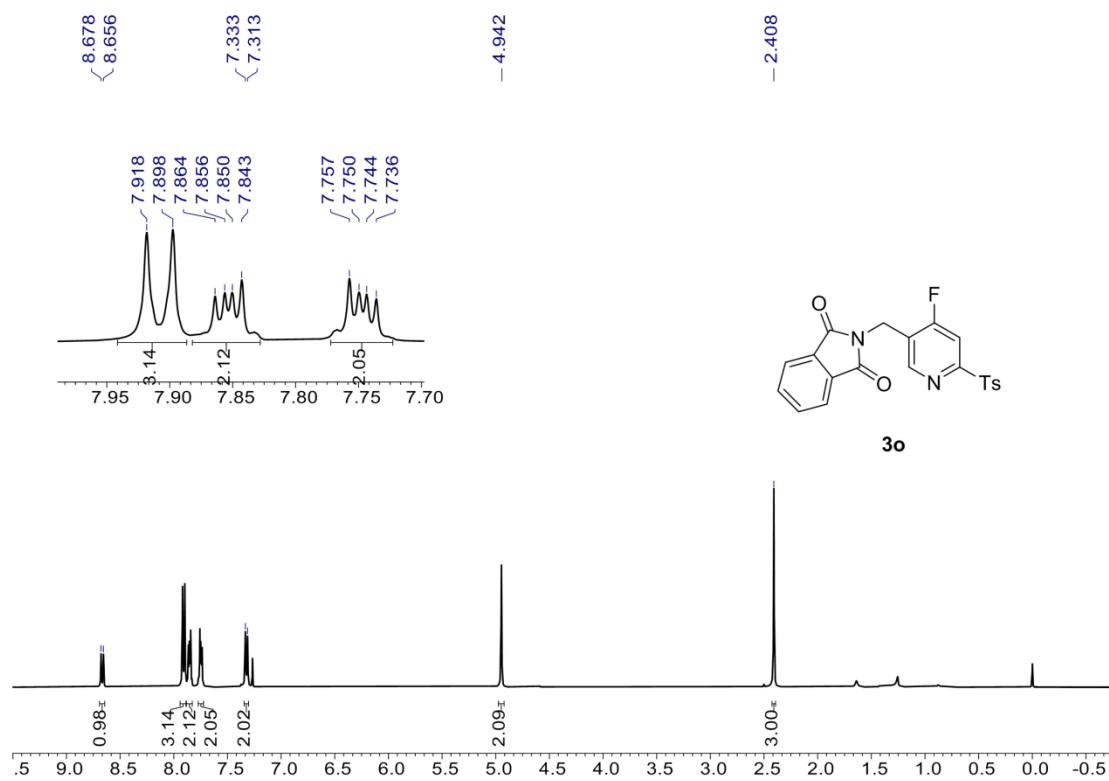

**<sup>19</sup>F NMR (376 MHz, CDCl<sub>3</sub>) for 3o**

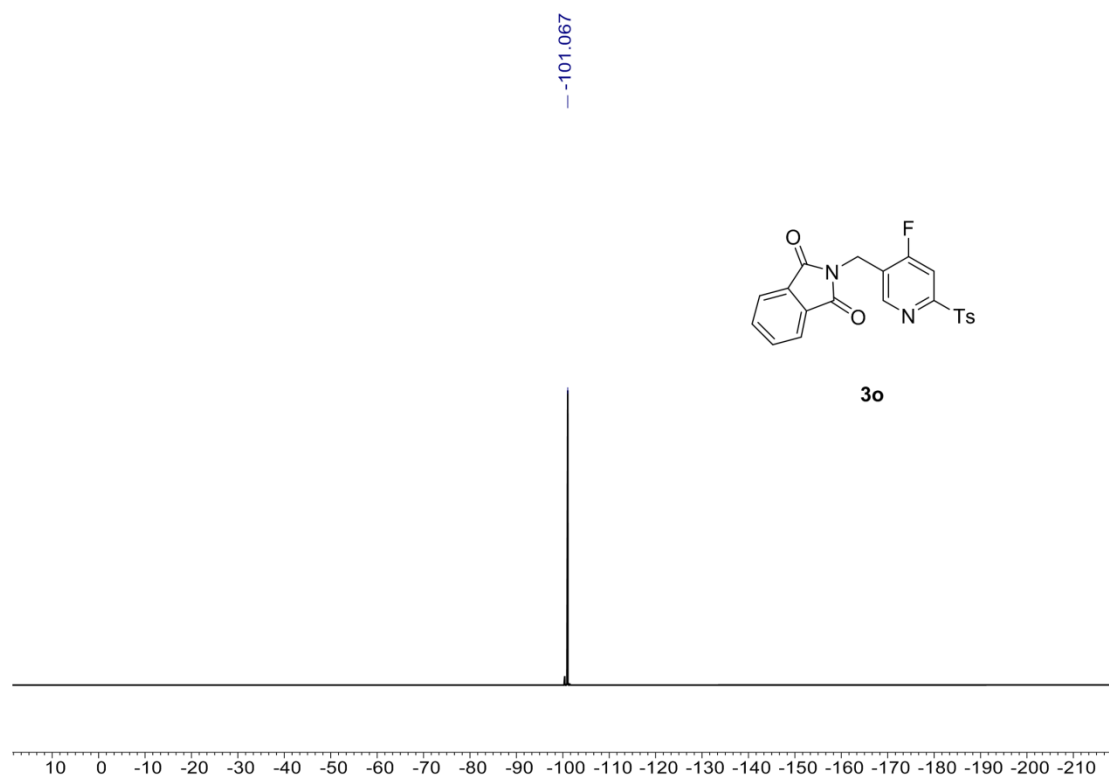



$^{13}\text{C}$  NMR (100 MHz,  $\text{CDCl}_3$ ) for **3o**

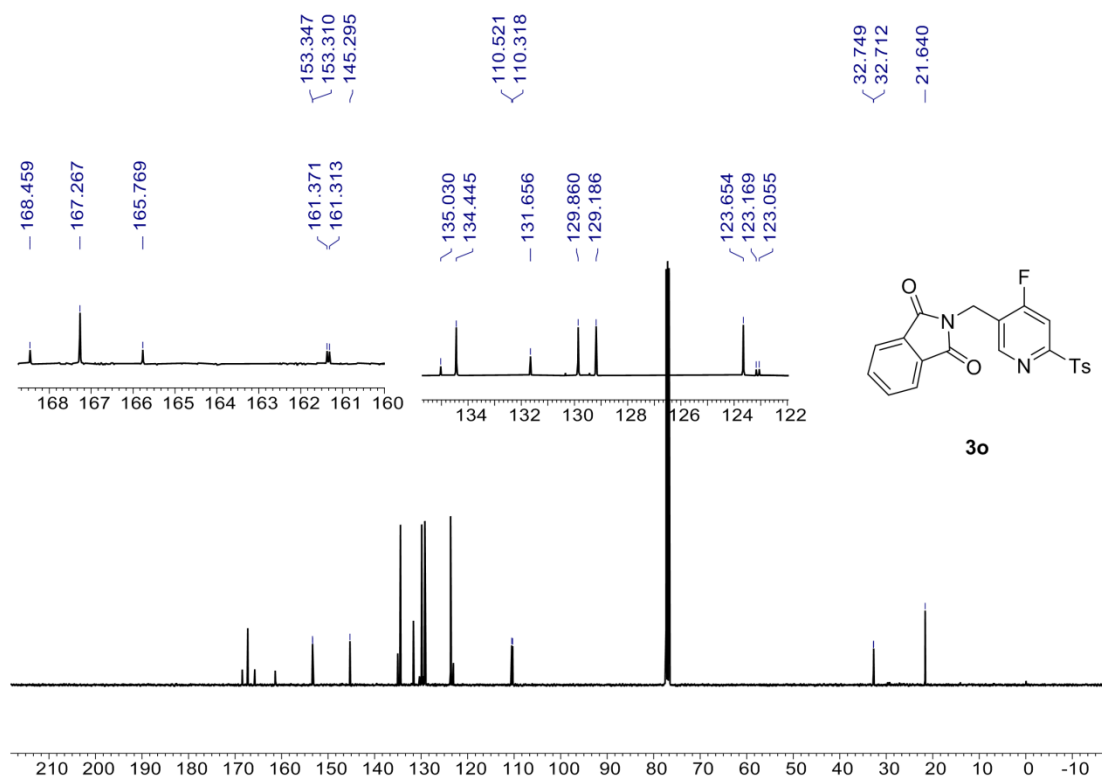

$^1\text{H}$  NMR (400 MHz,  $\text{CDCl}_3$ ) for **3p**

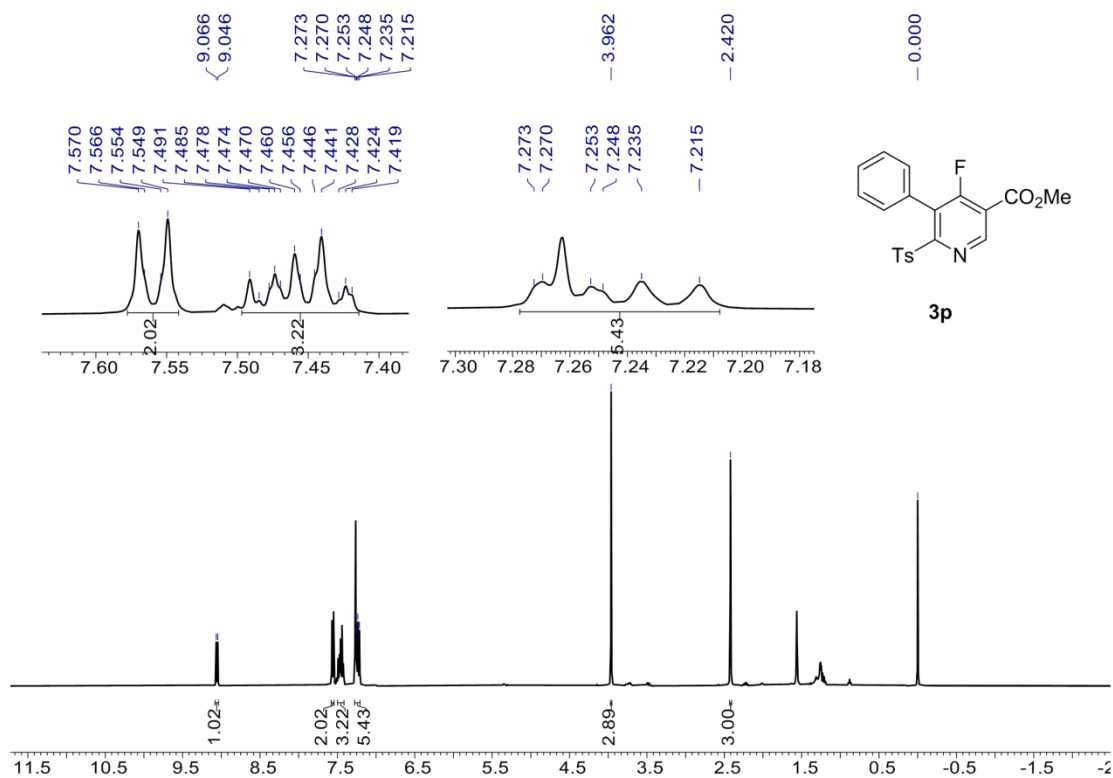

**<sup>19</sup>F NMR (376 MHz, CDCl<sub>3</sub>) for 3p**

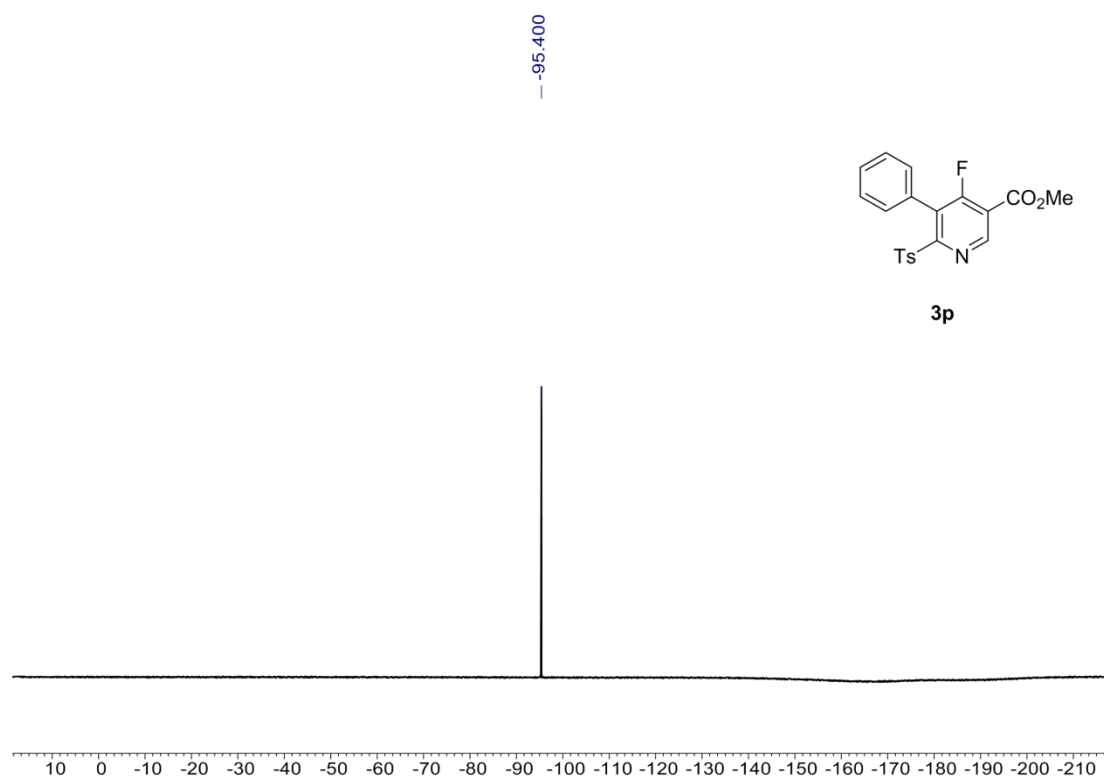

**<sup>1</sup>H NMR (400 MHz, CDCl<sub>3</sub>) for 4a**

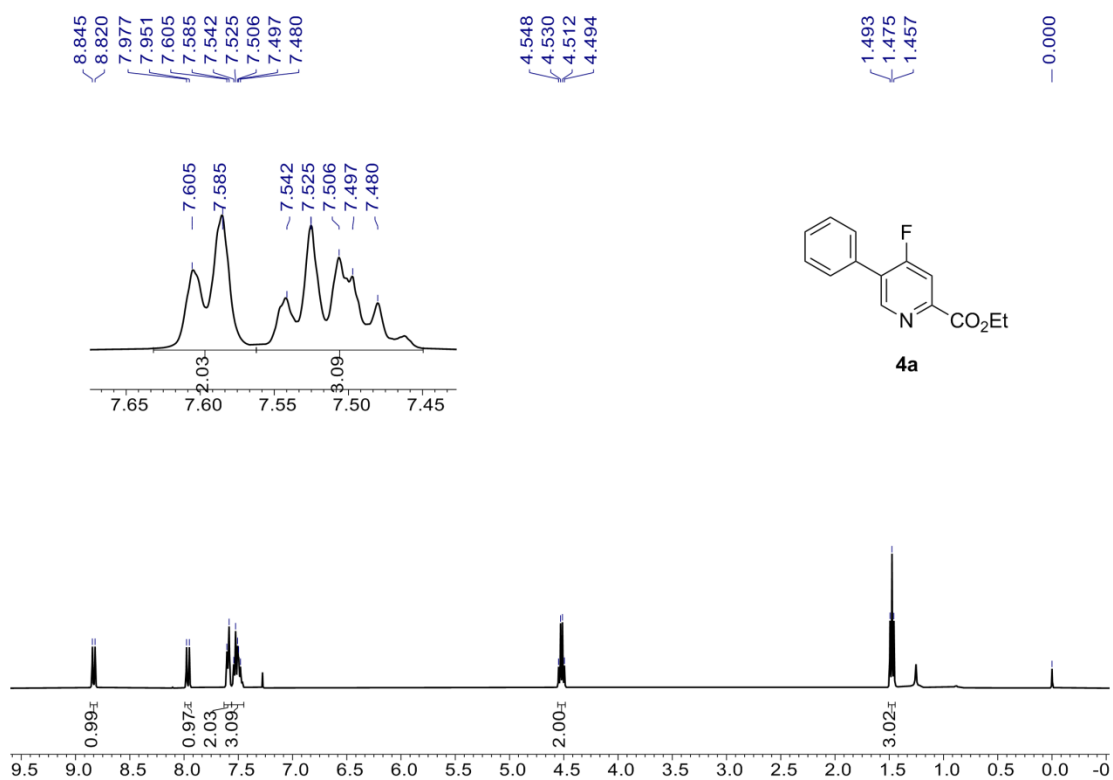

**<sup>19</sup>F NMR (376 MHz, CDCl<sub>3</sub>) for 4a**

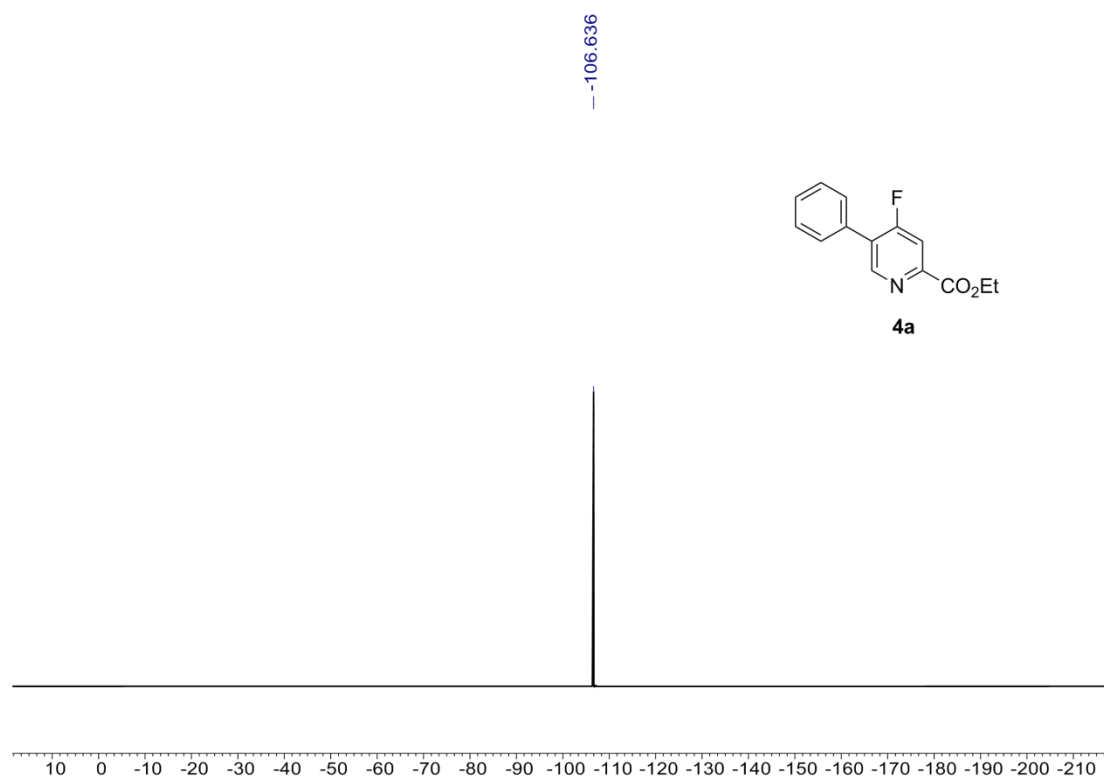

**<sup>13</sup>C NMR (100 MHz, CDCl<sub>3</sub>) for 4a**

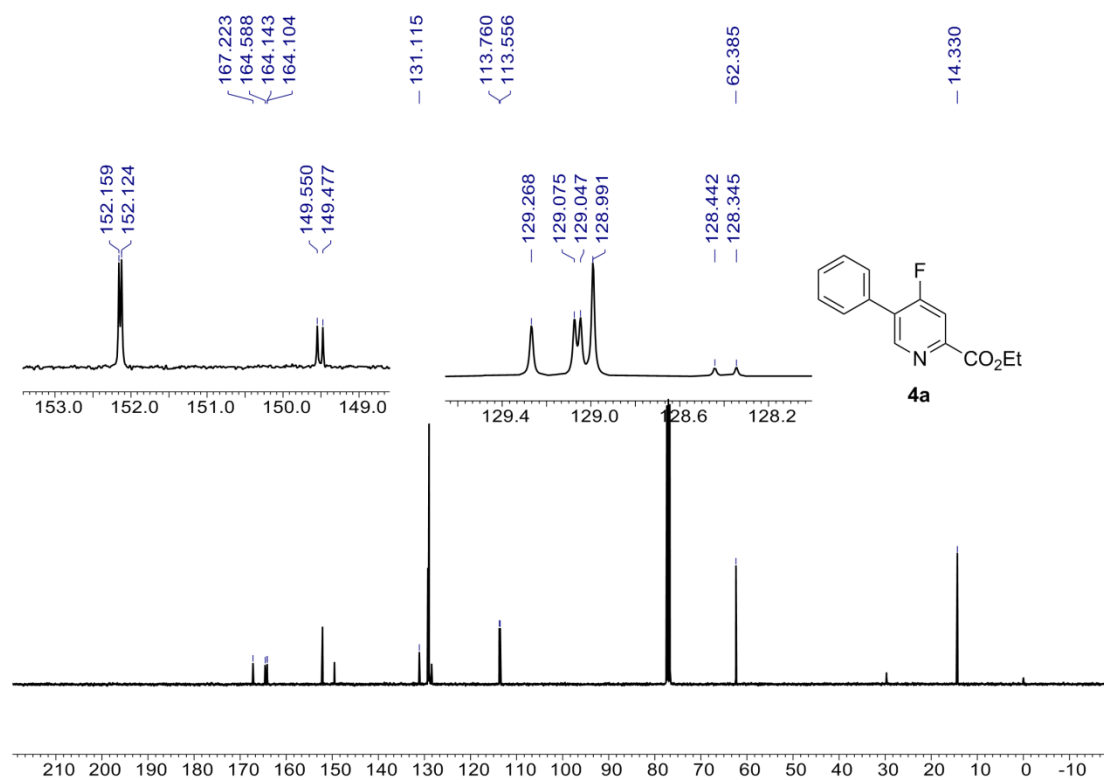

**<sup>1</sup>H NMR (400 MHz, CDCl<sub>3</sub>) for 4b**

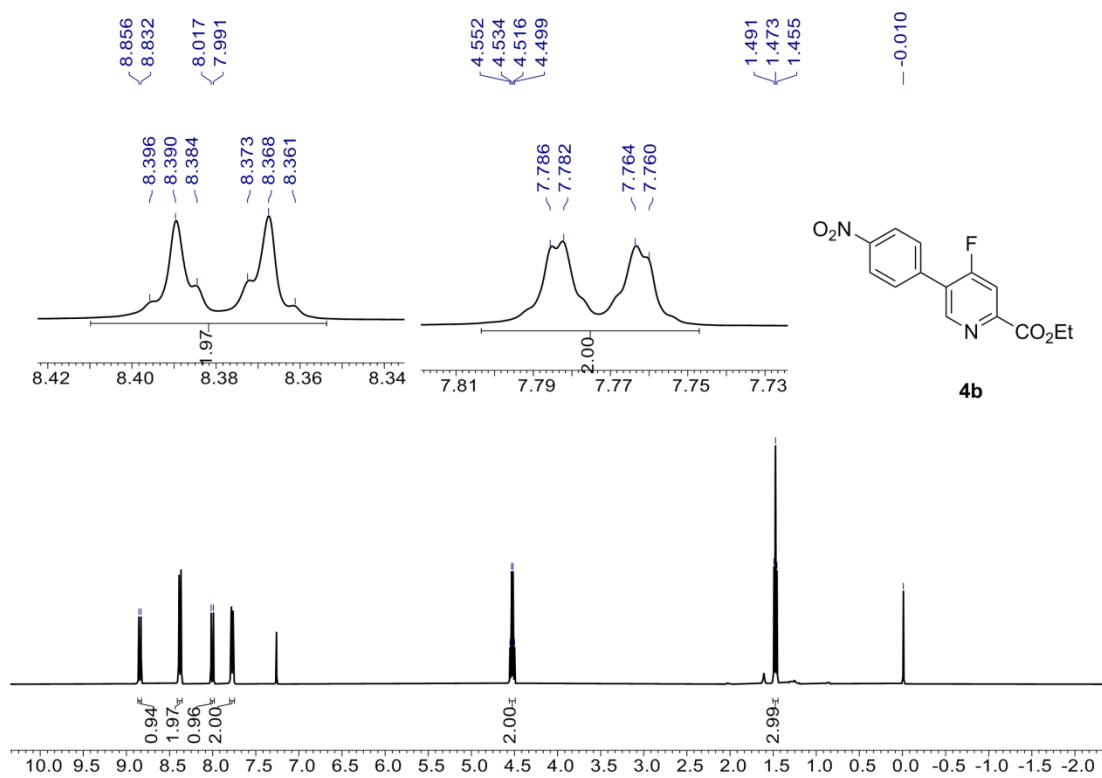

**<sup>19</sup>F NMR (376 MHz, CDCl<sub>3</sub>) for 4b**

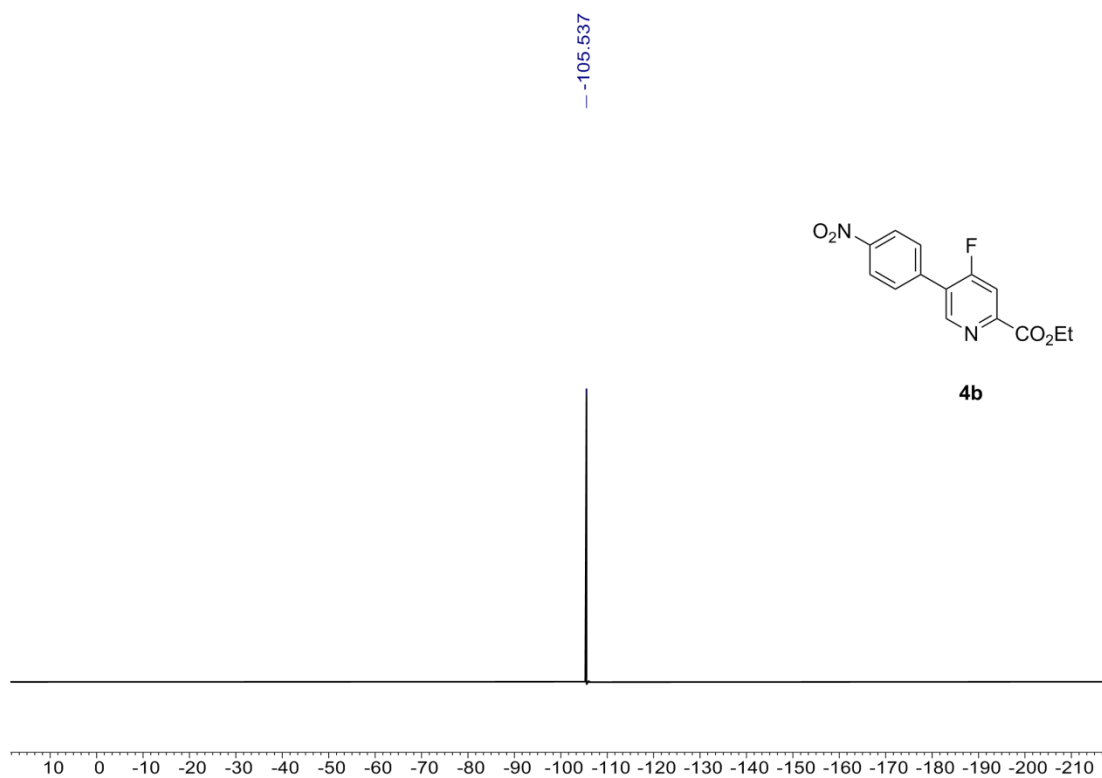

$^{13}\text{C}$  NMR (100 MHz,  $\text{CDCl}_3$ ) for **4b**

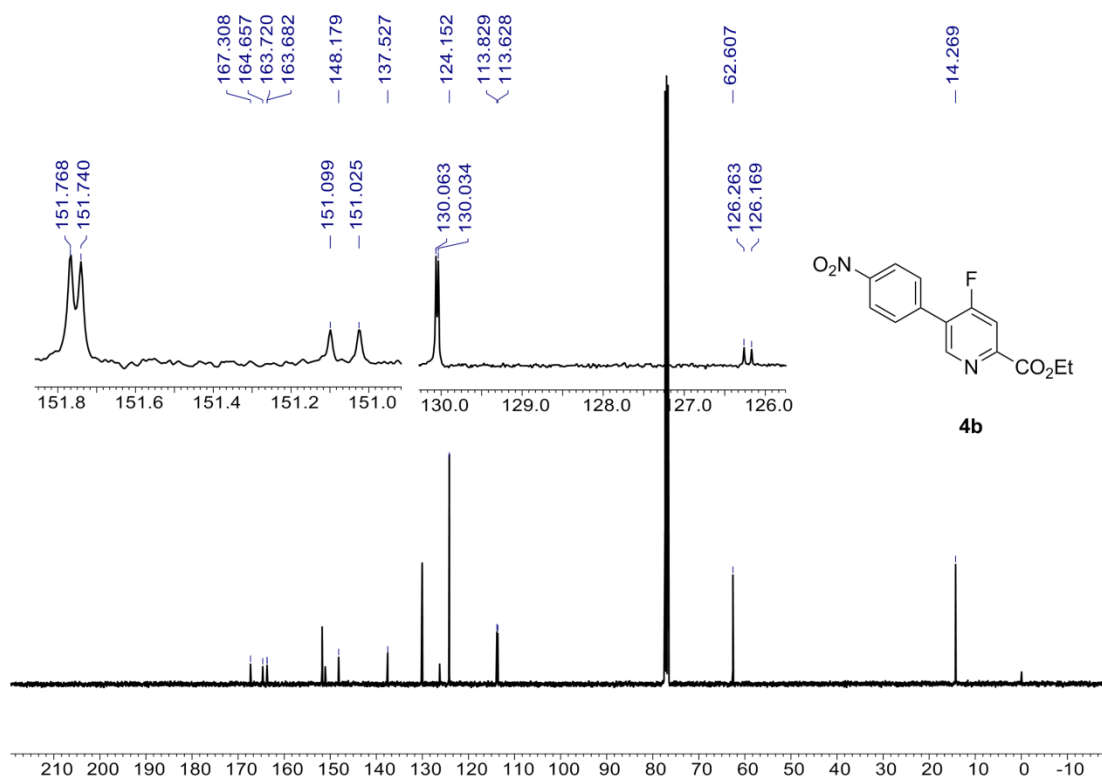

$^1\text{H}$  NMR (400 MHz,  $\text{CDCl}_3$ ) for **4c**

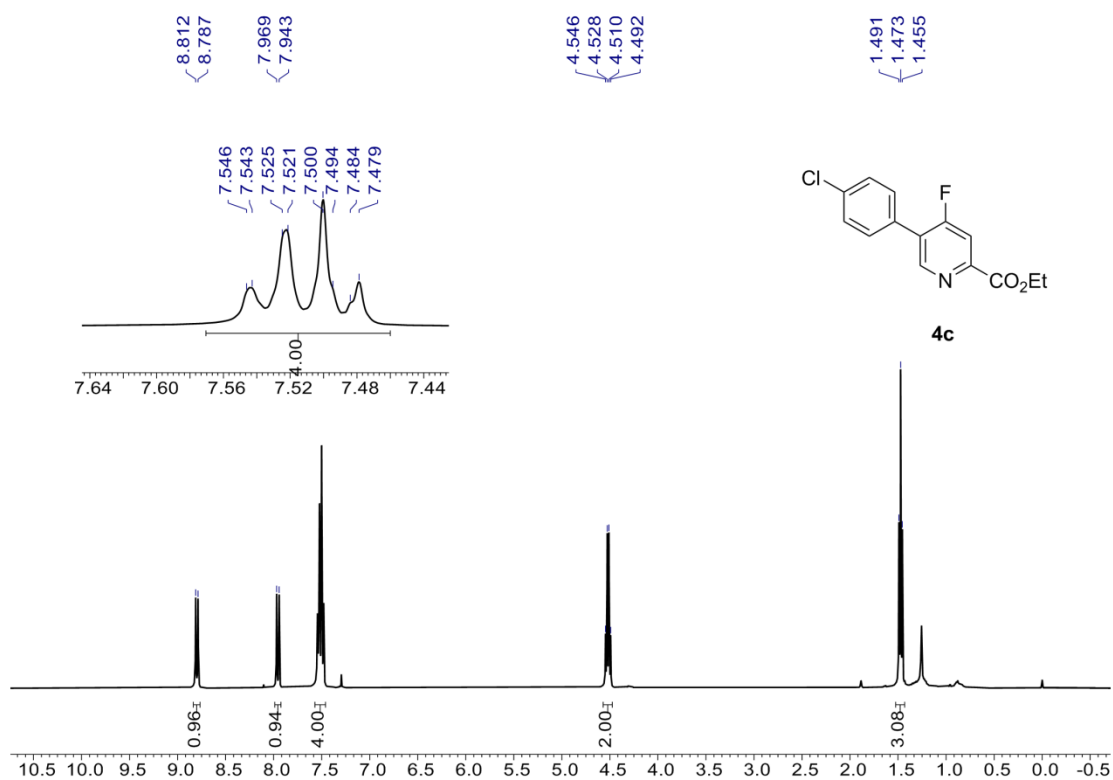

<sup>19</sup>F NMR (376 MHz, CDCl<sub>3</sub>) for **4c**

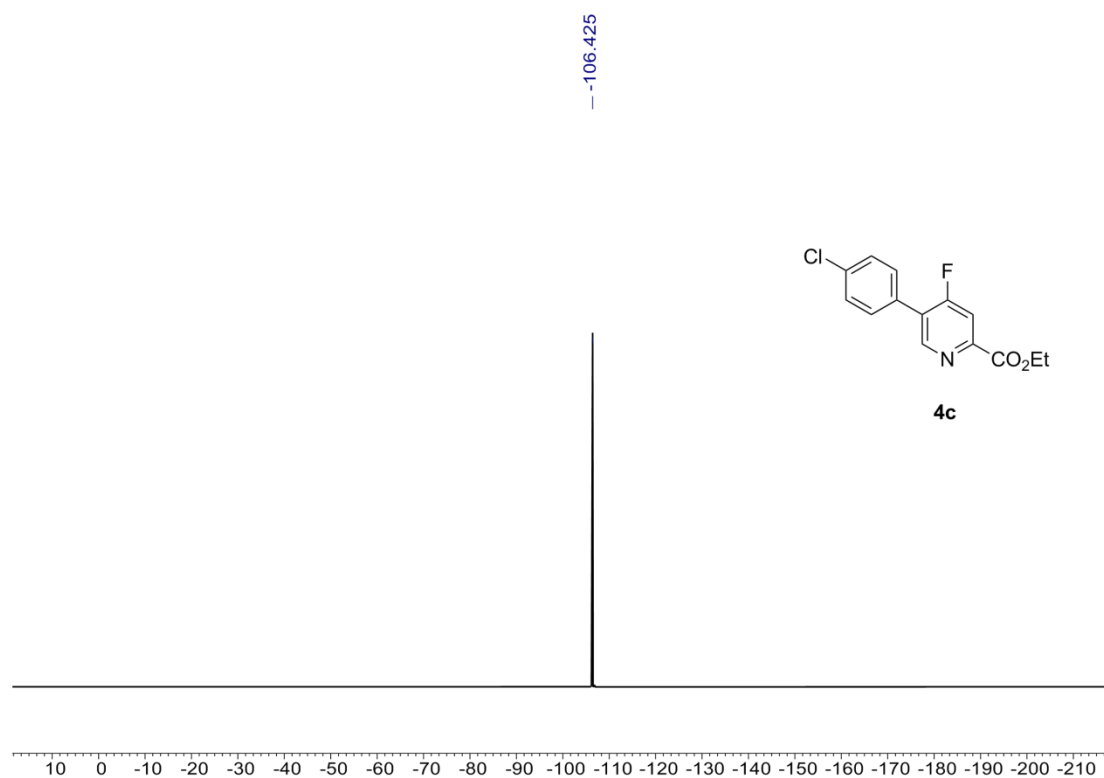

<sup>13</sup>C NMR (100 MHz, CDCl<sub>3</sub>) for **4c**

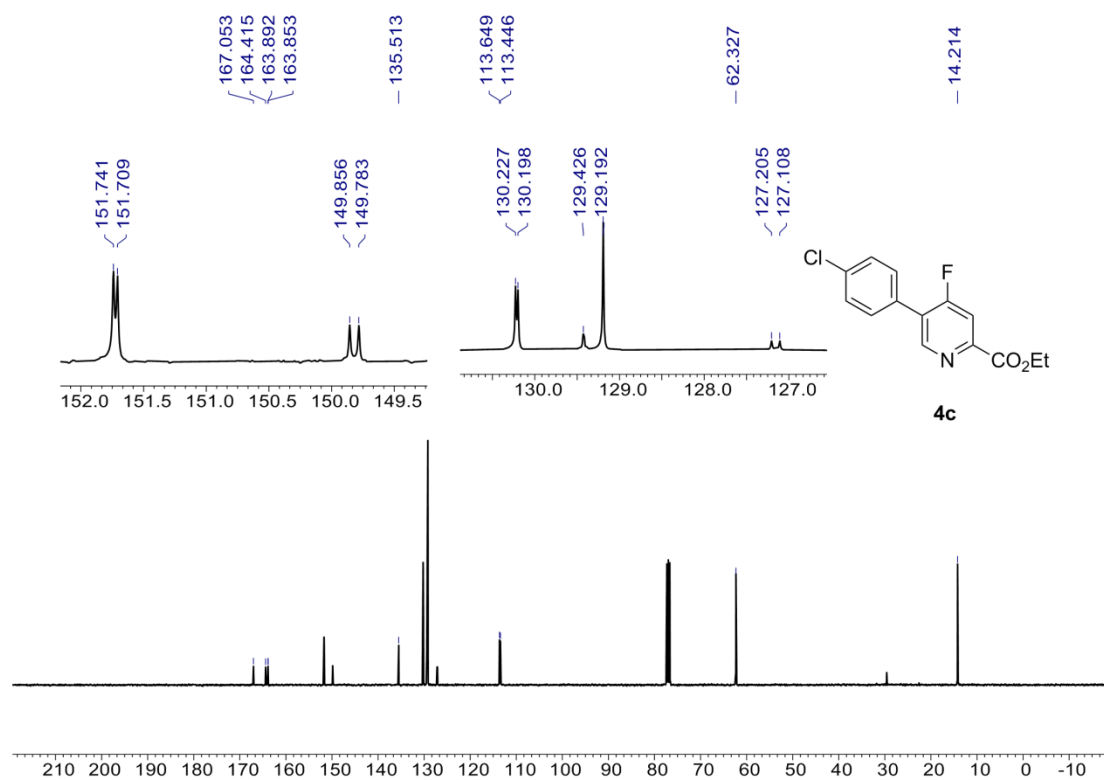

**<sup>1</sup>H NMR (400 MHz, CDCl<sub>3</sub>) for 4d**

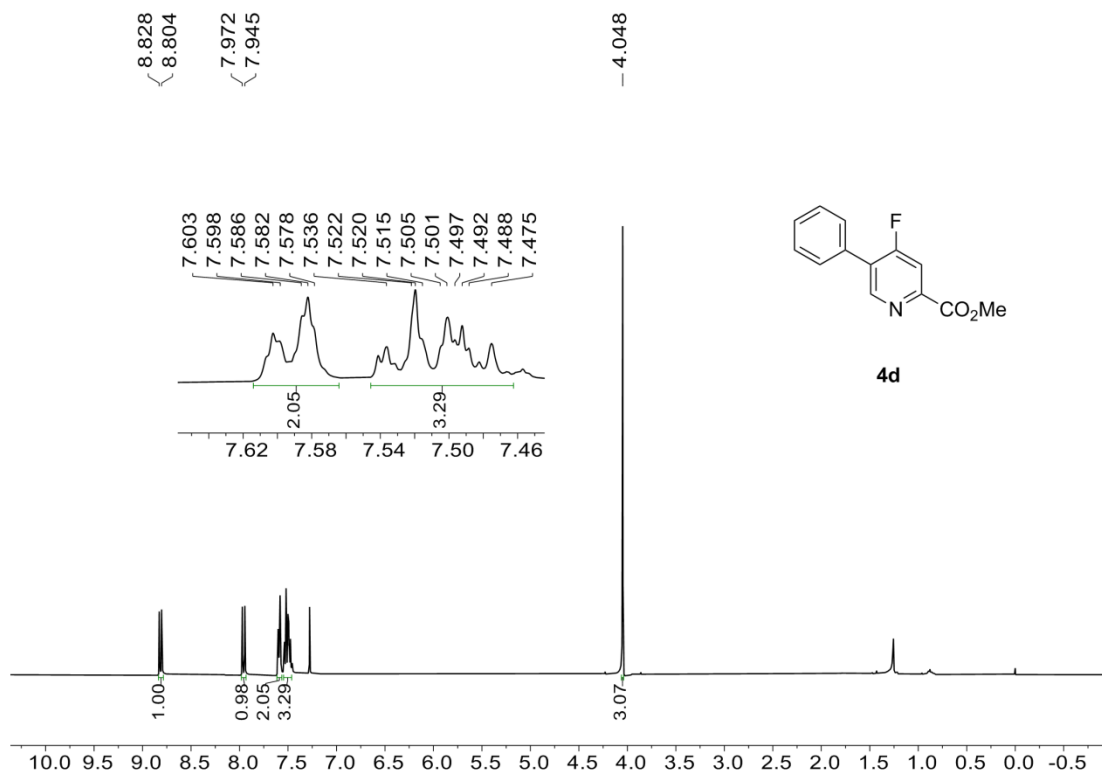

**<sup>19</sup>F NMR (376 MHz, CDCl<sub>3</sub>) for 4d**

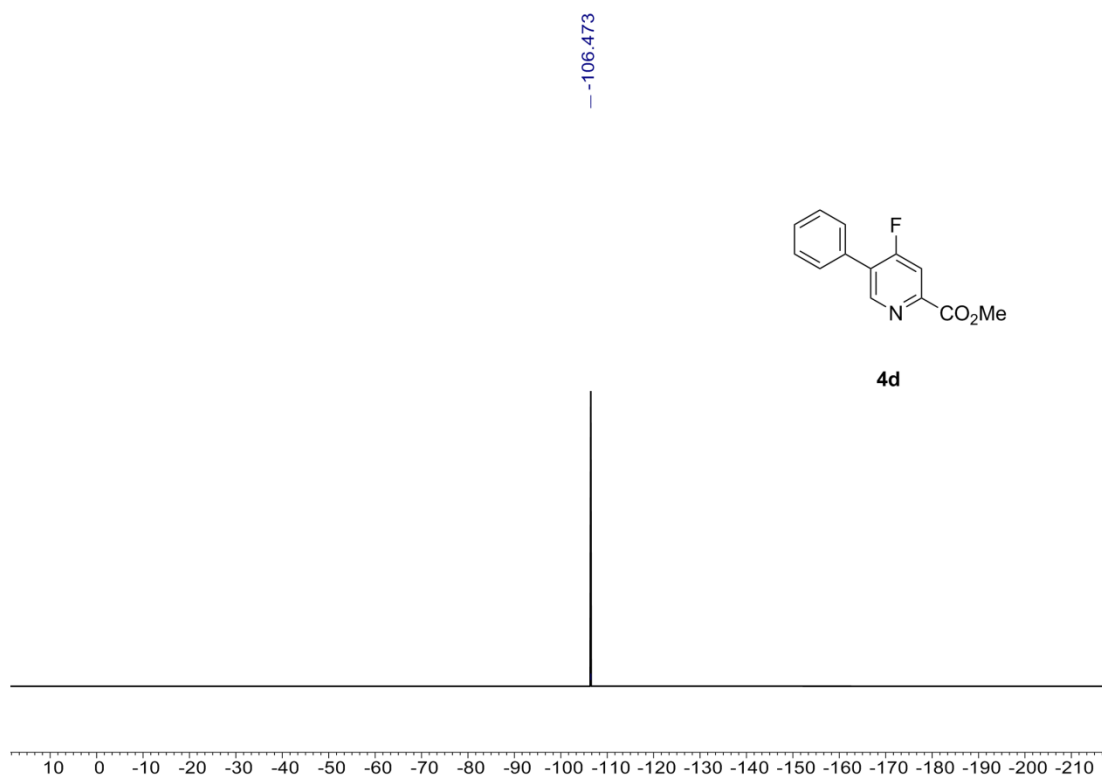

<sup>13</sup>C NMR (100 MHz, CDCl<sub>3</sub>) for **4d**

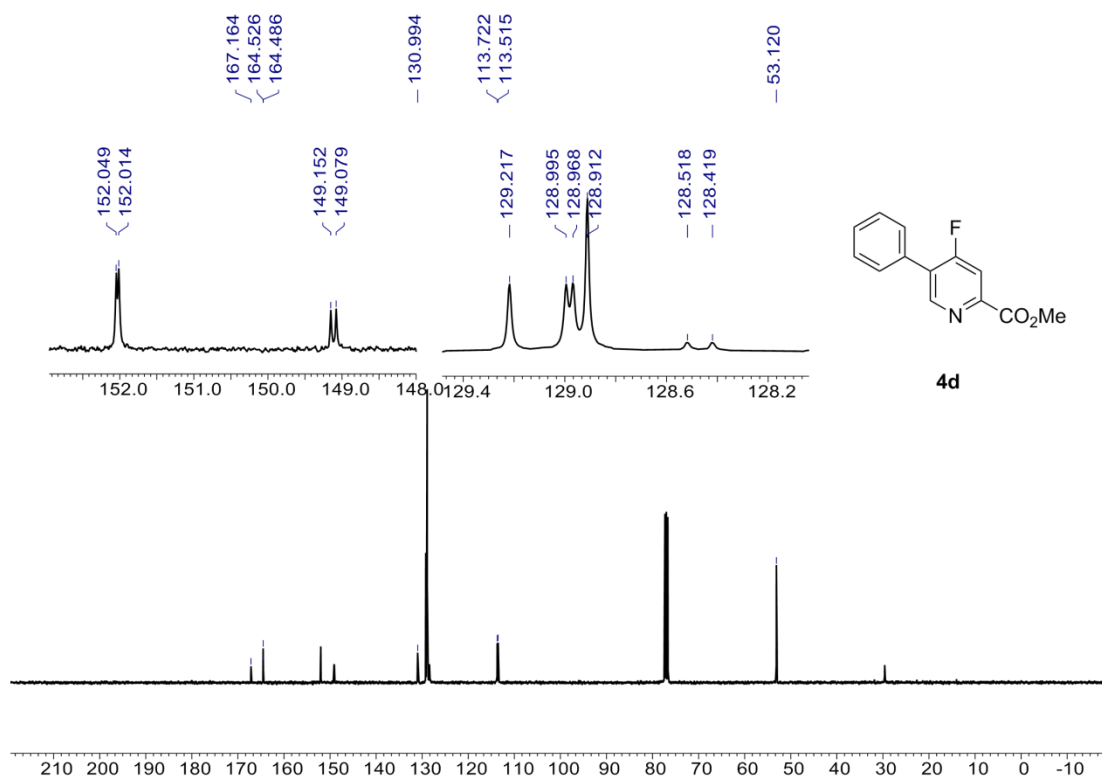

<sup>1</sup>H NMR (400 MHz, CDCl<sub>3</sub>) for **4e**

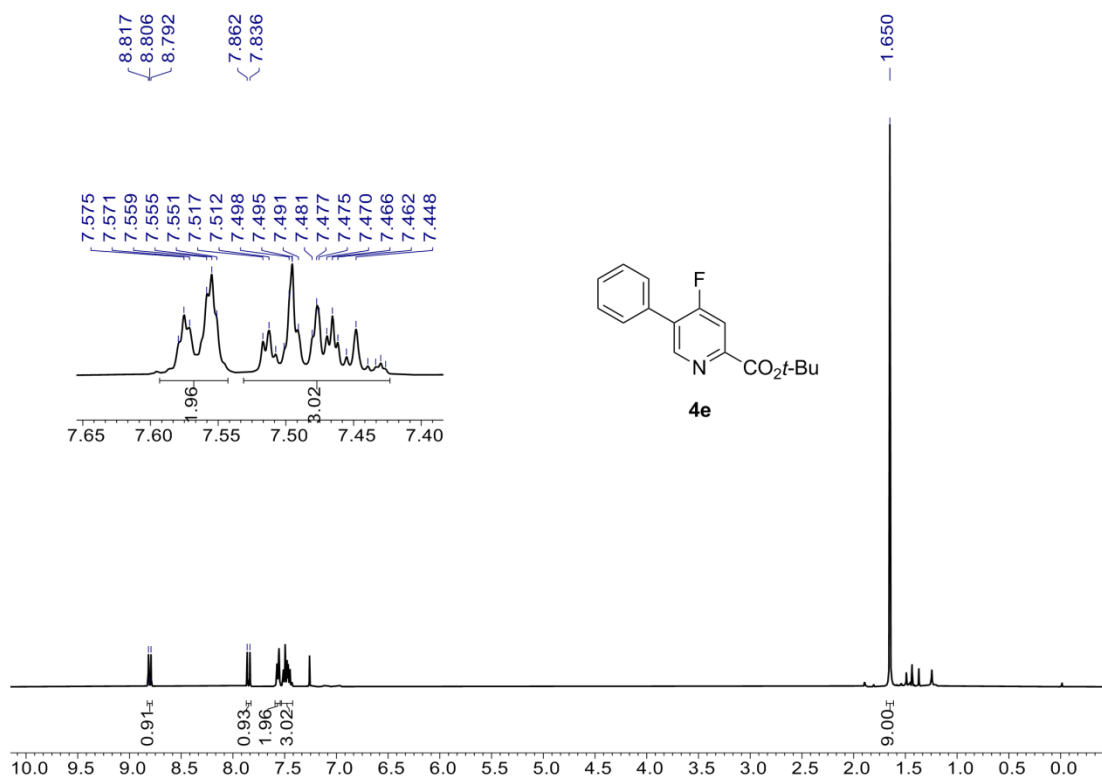



<sup>19</sup>F NMR (376 MHz, CDCl<sub>3</sub>) for **4e**

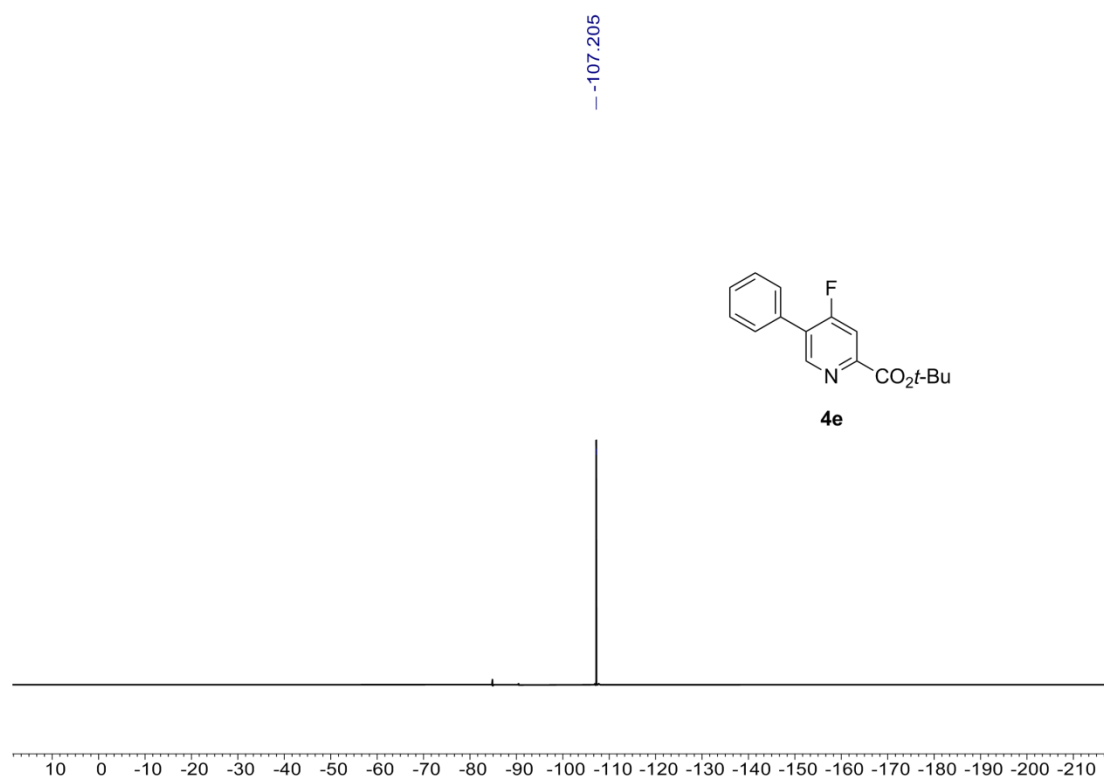

<sup>13</sup>C NMR (100 MHz, CDCl<sub>3</sub>) for **4e**

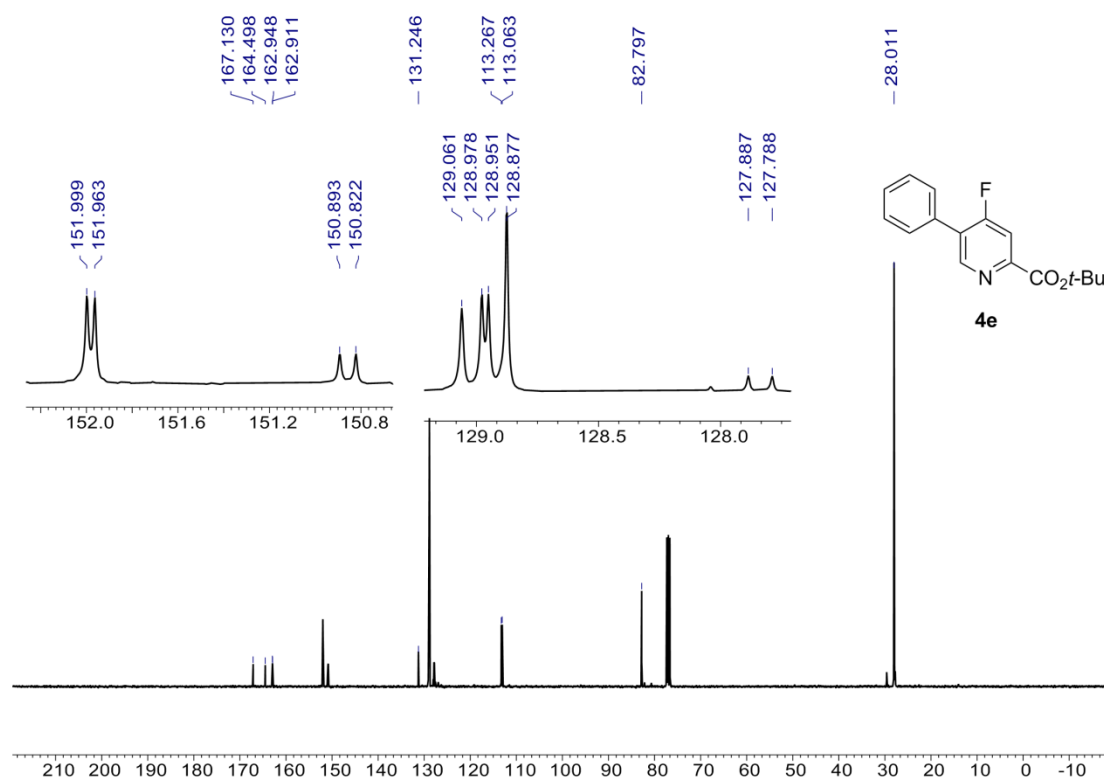

**<sup>1</sup>H NMR (400 MHz, CDCl<sub>3</sub>) for 4f**

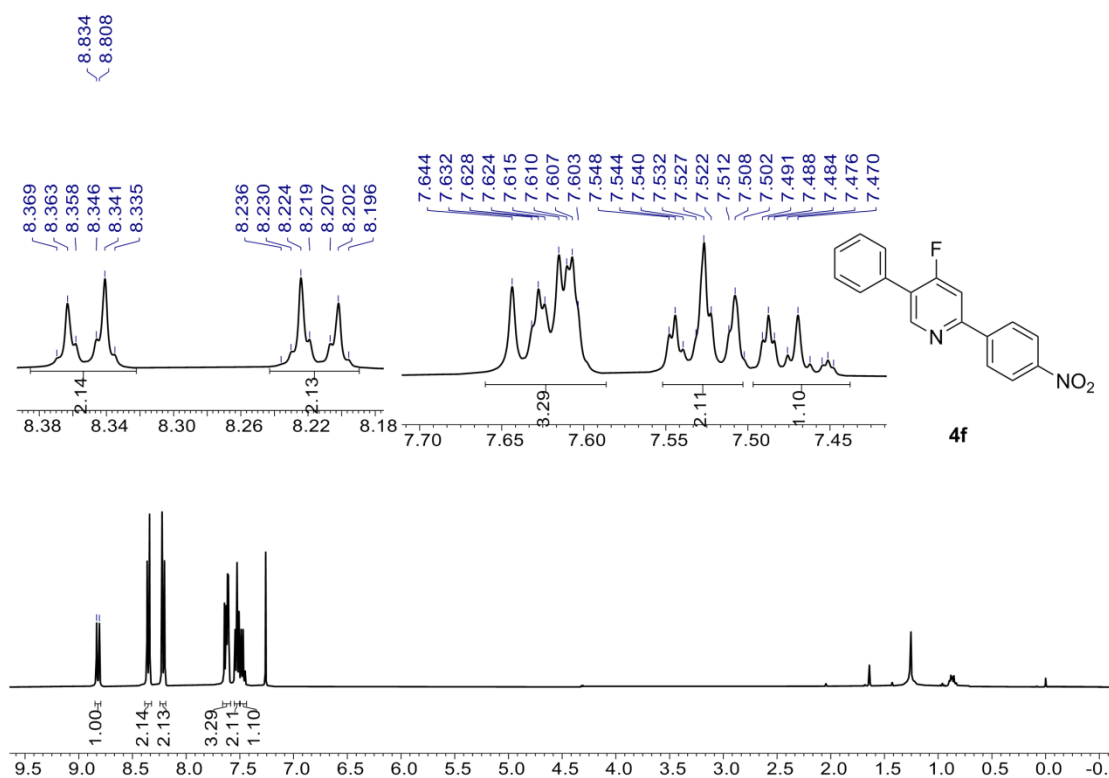

**<sup>19</sup>F NMR (376 MHz, CDCl<sub>3</sub>) for 4f**

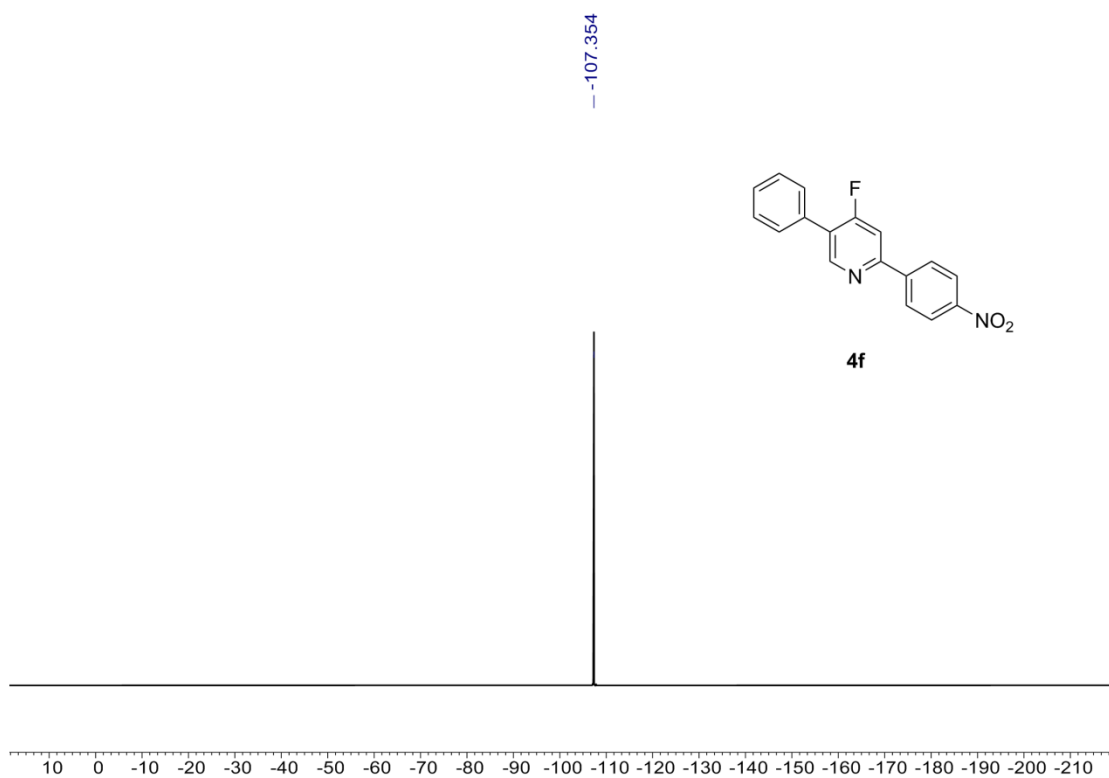

$^{13}\text{C}$  NMR (100 MHz,  $\text{CDCl}_3$ ) for **4f**

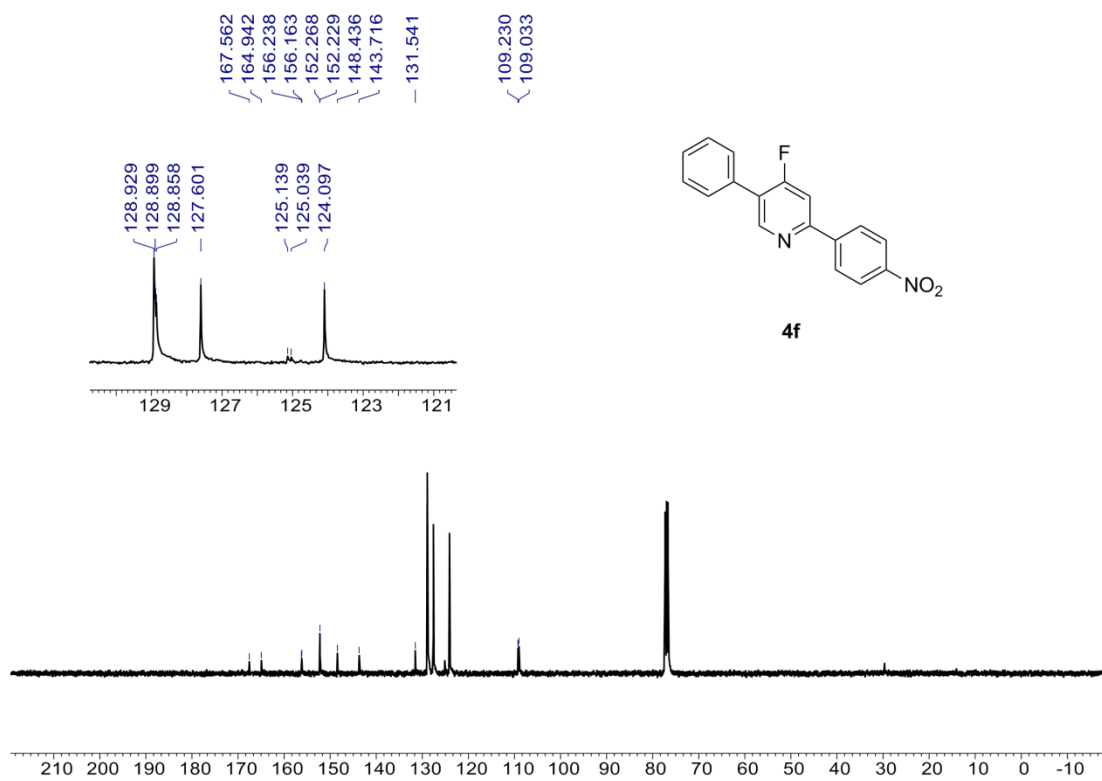

$^1\text{H}$  NMR (400 MHz,  $\text{CDCl}_3$ ) for **4g**

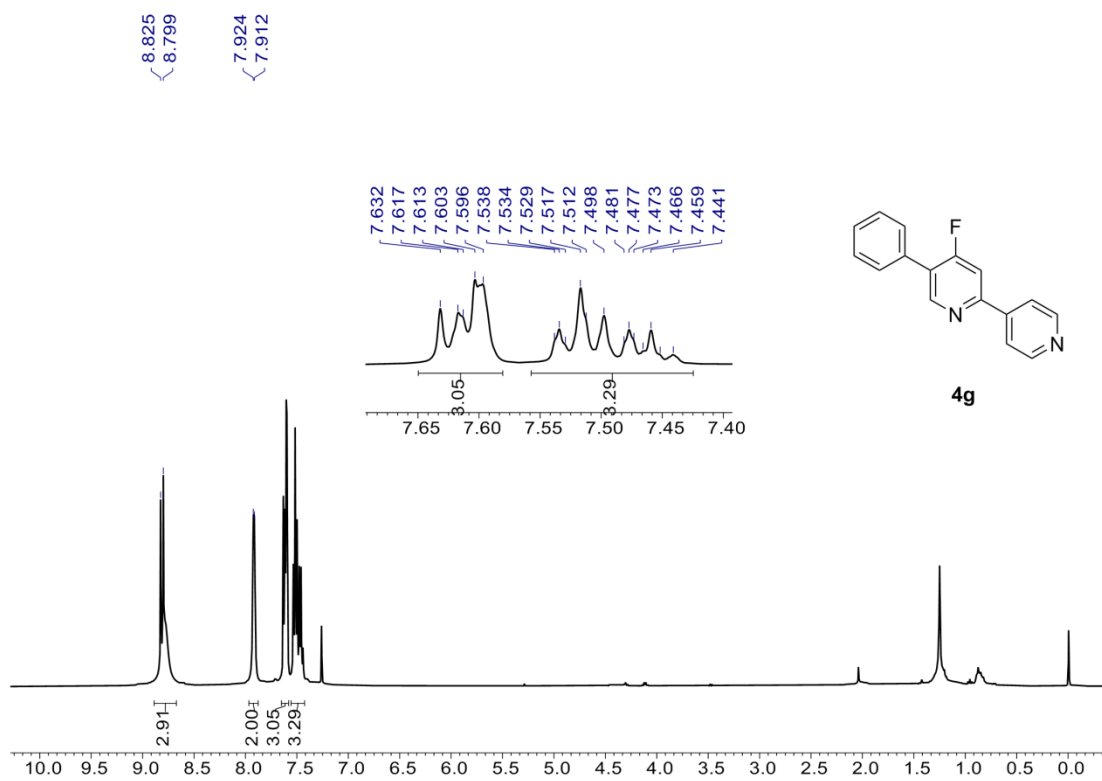

<sup>19</sup>F NMR (376 MHz, CDCl<sub>3</sub>) for **4g**

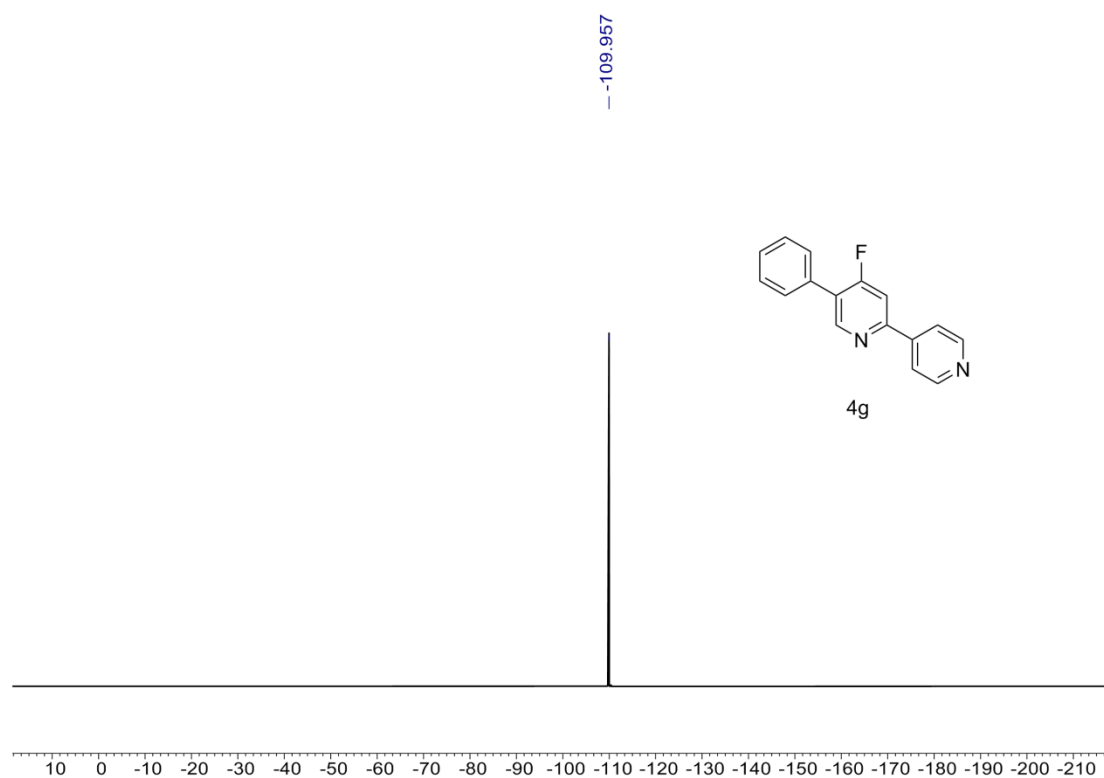

<sup>13</sup>C NMR (100 MHz, CDCl<sub>3</sub>) for **4g**

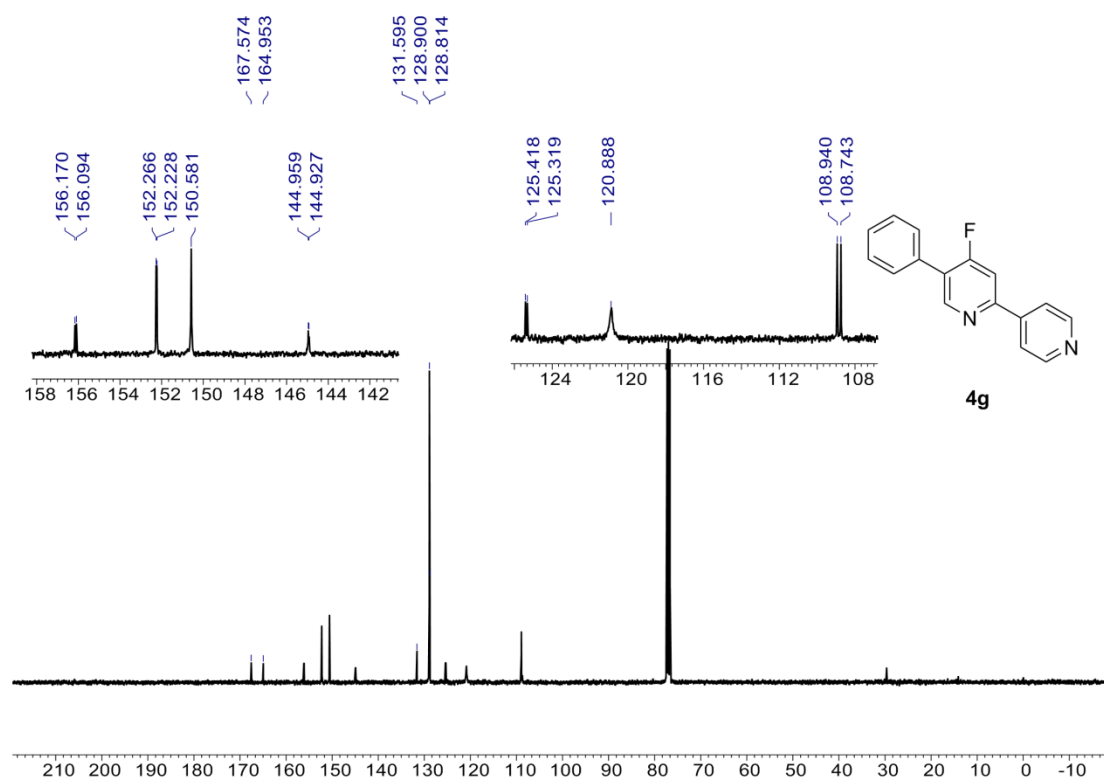

**<sup>1</sup>H NMR** (400 MHz, CDCl<sub>3</sub>) for **5**

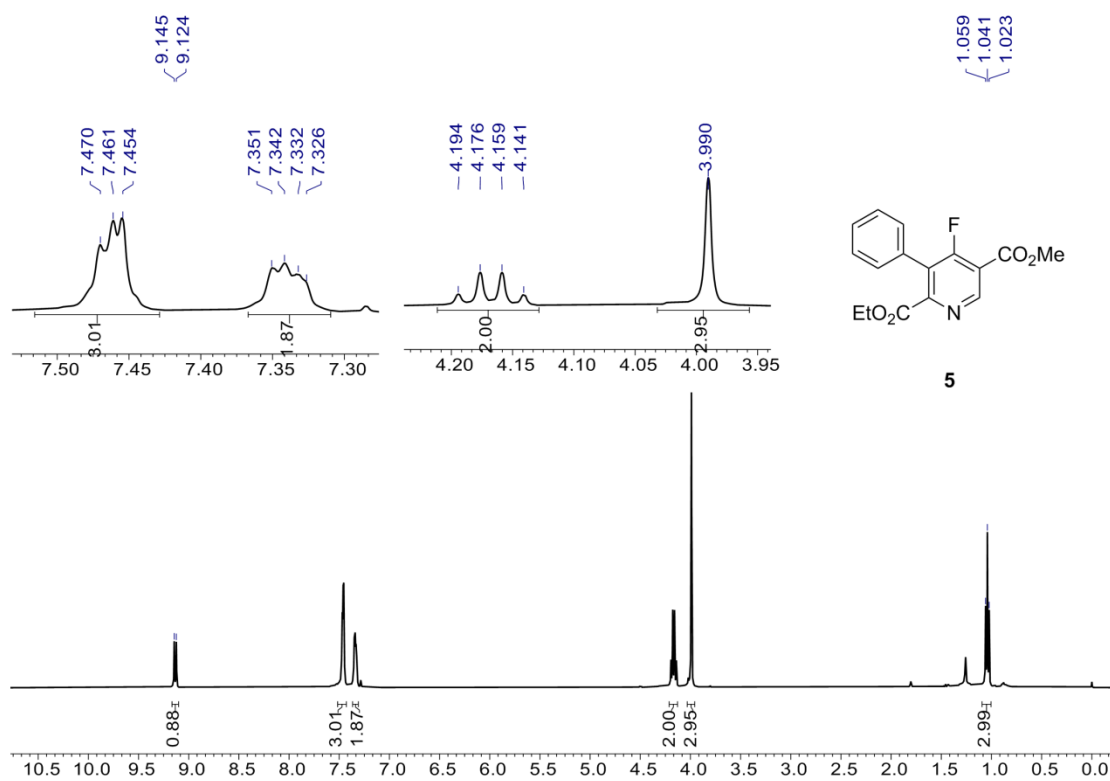

**<sup>19</sup>F NMR** (376 MHz, CDCl<sub>3</sub>) for **5**

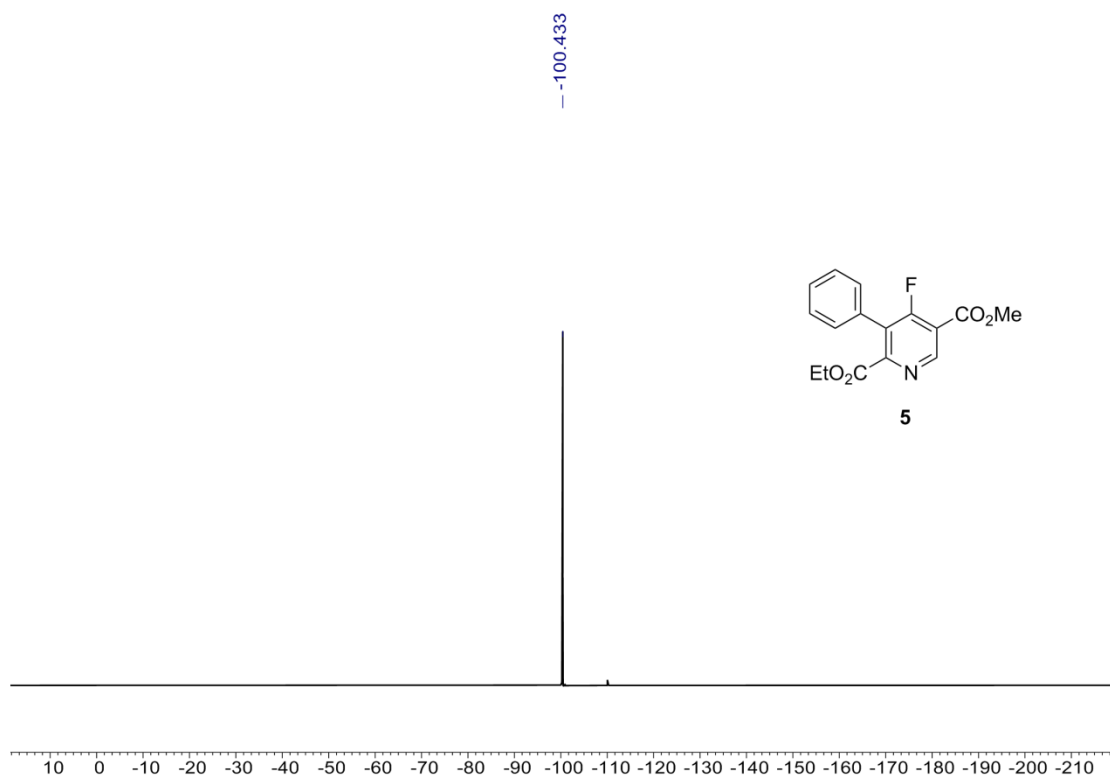

**<sup>13</sup>C NMR (100 MHz, CDCl<sub>3</sub>) for 5**

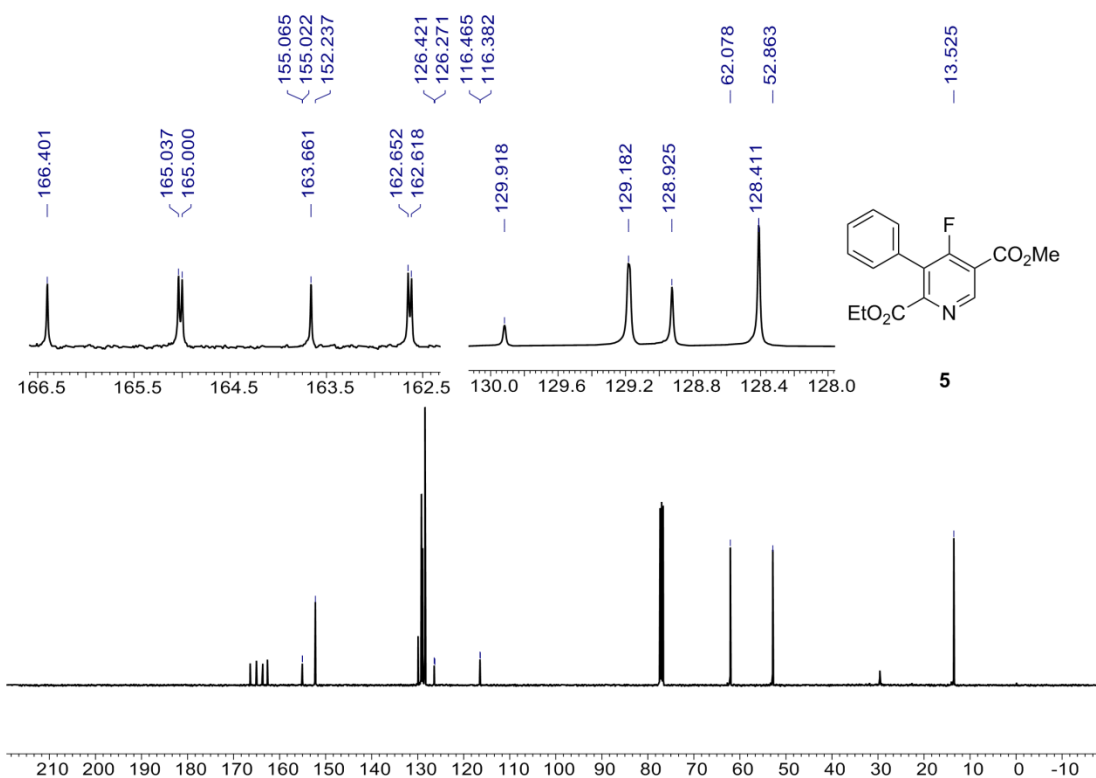

**<sup>1</sup>H NMR (400 MHz, CDCl<sub>3</sub>) for 6**

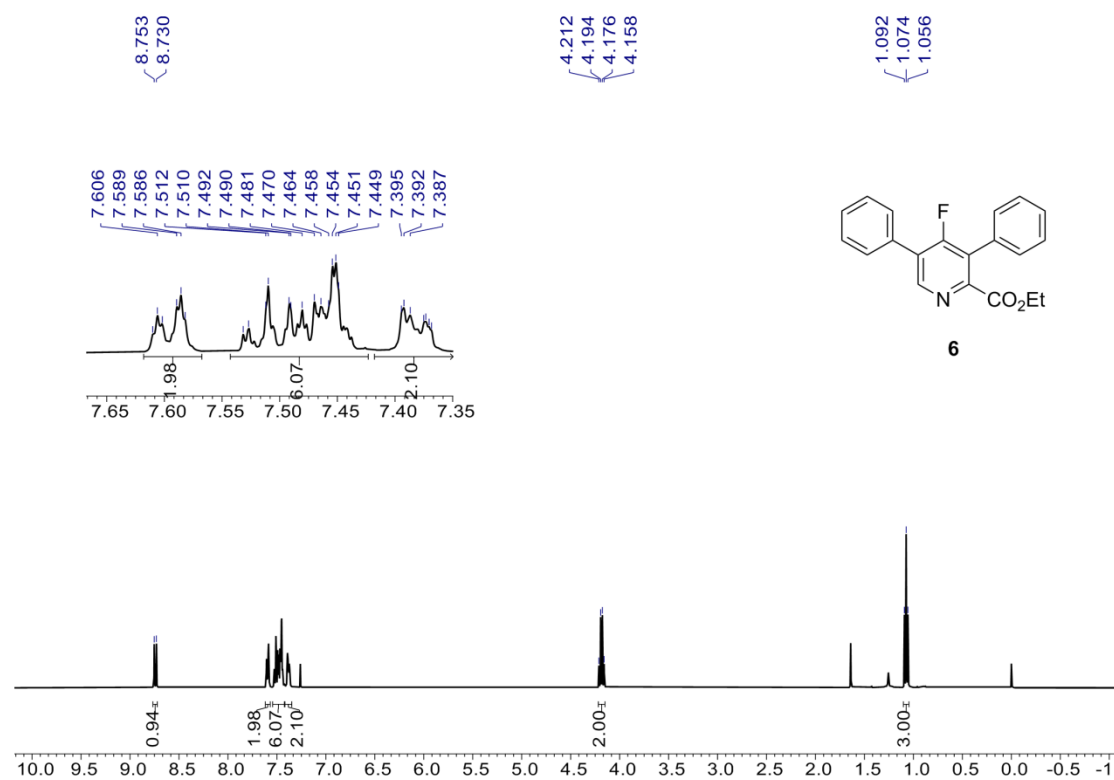

<sup>19</sup>F NMR (376 MHz, CDCl<sub>3</sub>) for **6**

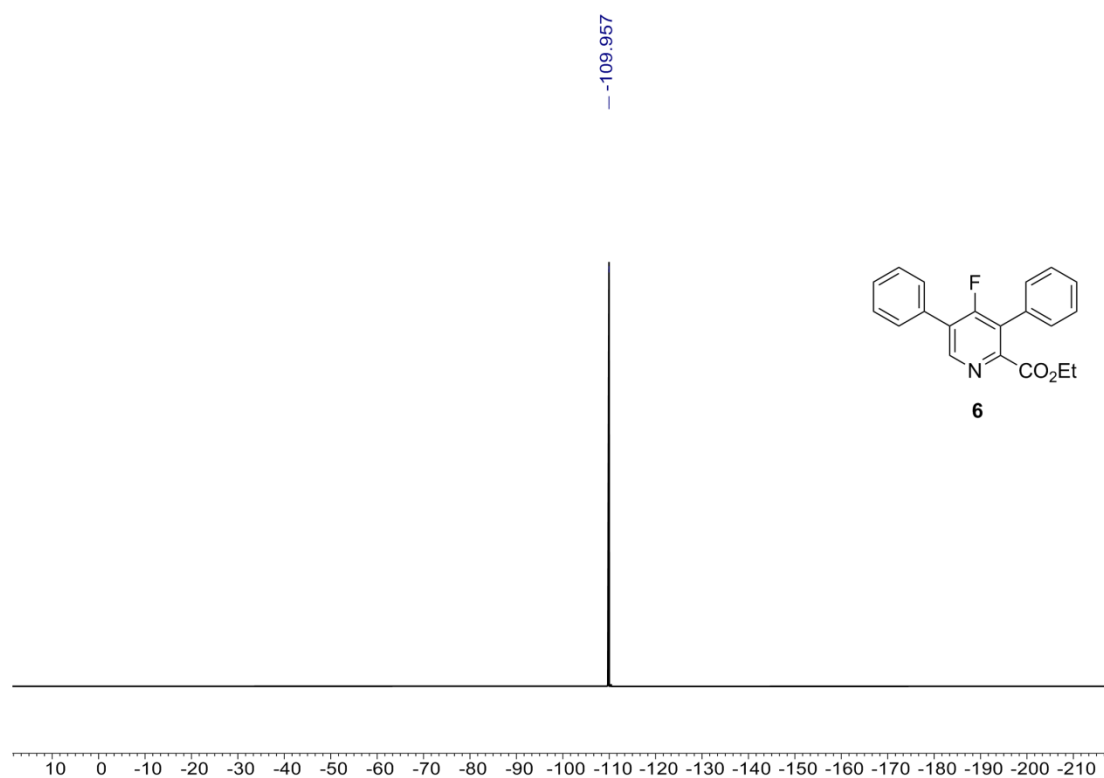

<sup>13</sup>C NMR (100 MHz, CDCl<sub>3</sub>) for **6**

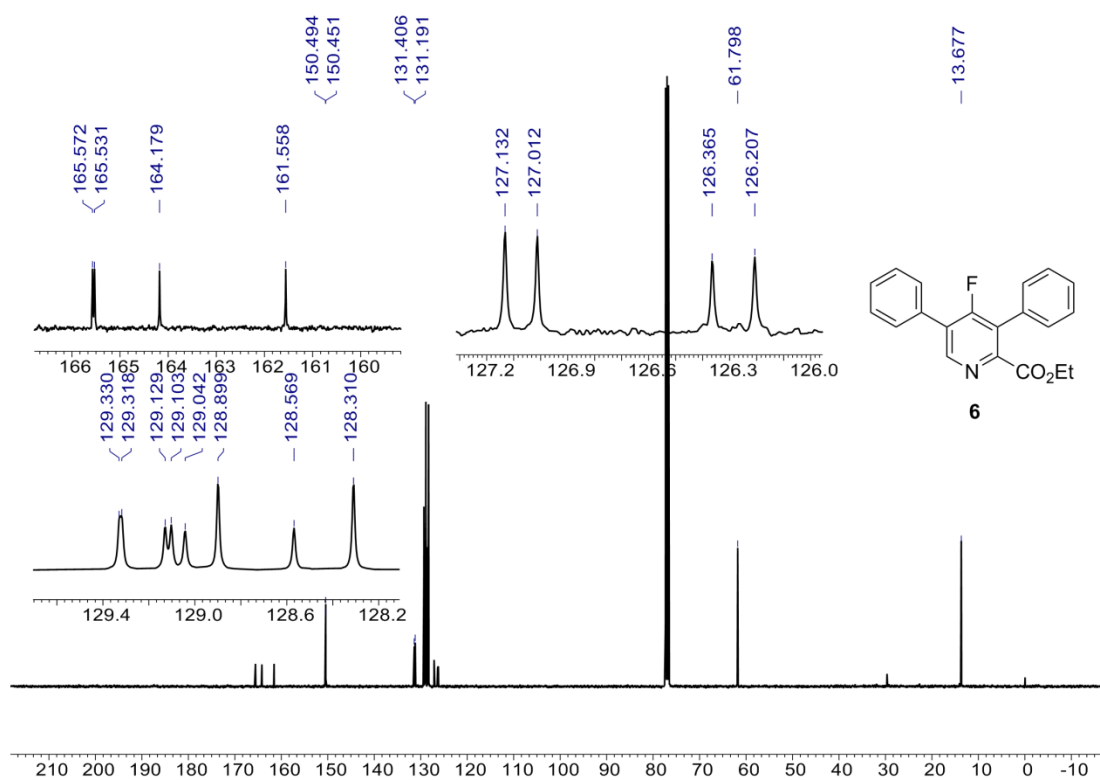

<sup>1</sup>H NMR (400 MHz, CDCl<sub>3</sub>) for **7**

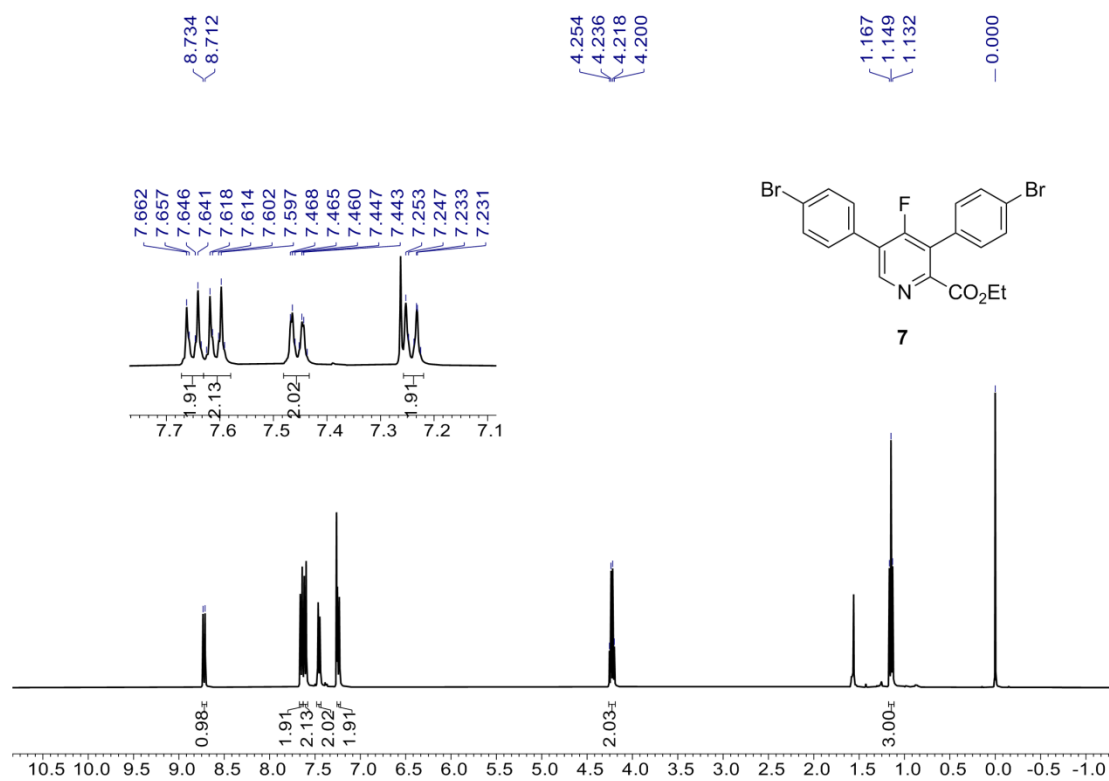

<sup>19</sup>F NMR (376 MHz, CDCl<sub>3</sub>) for **7**

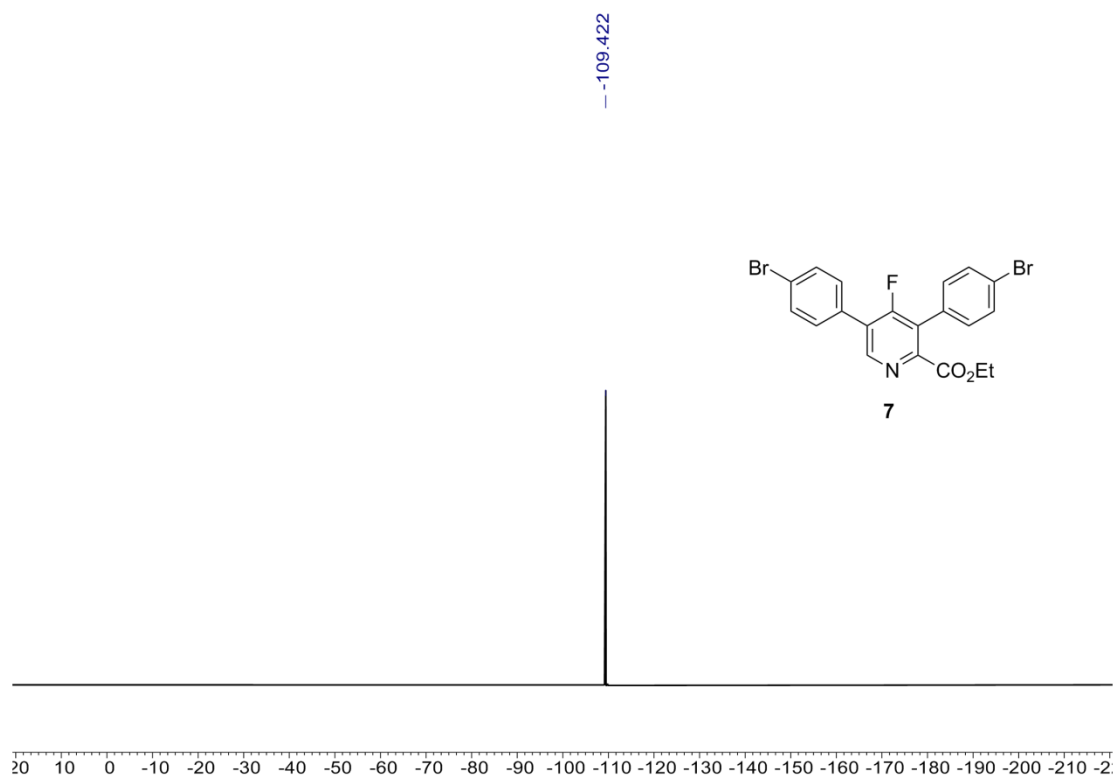



$^{13}\text{C}$  NMR (100 MHz,  $\text{CDCl}_3$ ) for **7**

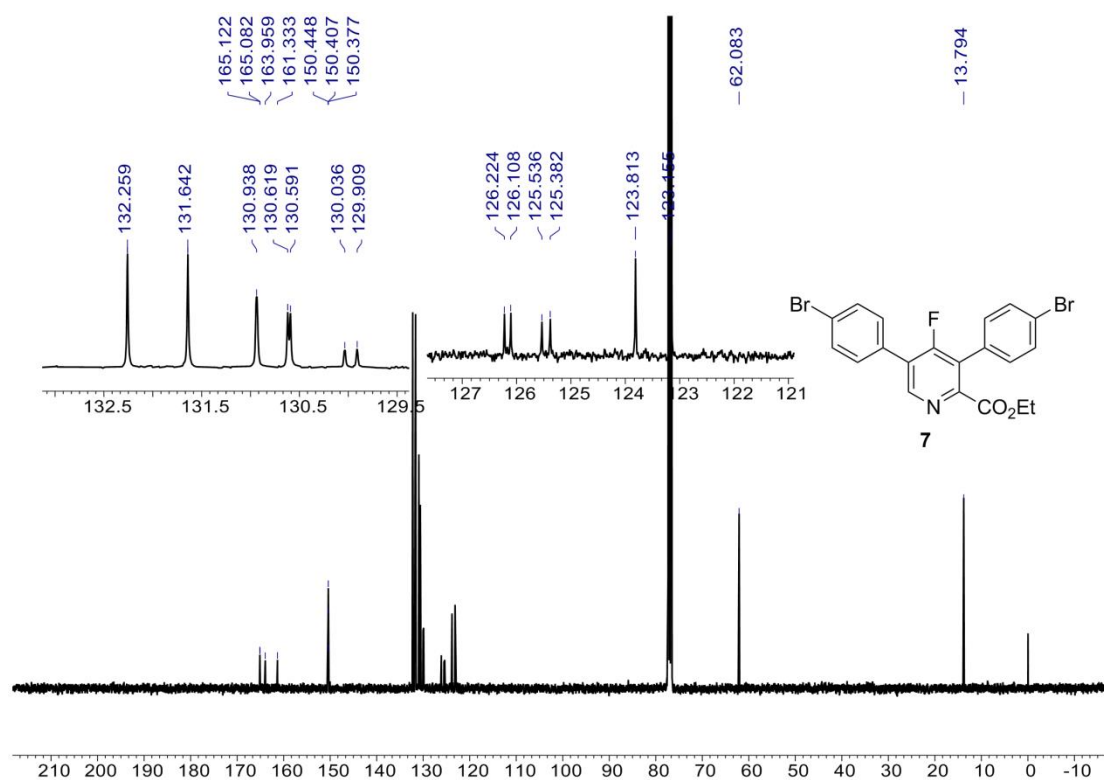

$^1\text{H}$  NMR (400 MHz,  $\text{CDCl}_3$ ) for **8**

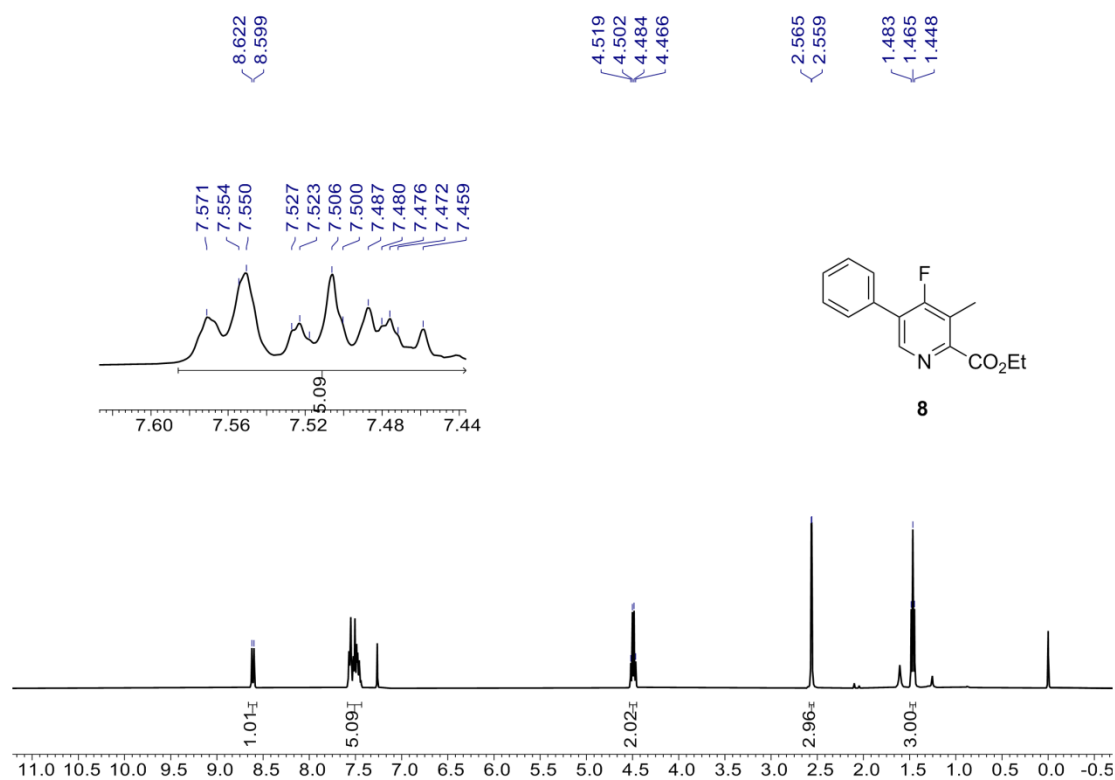

<sup>19</sup>F NMR (376 MHz, CDCl<sub>3</sub>) for **8**

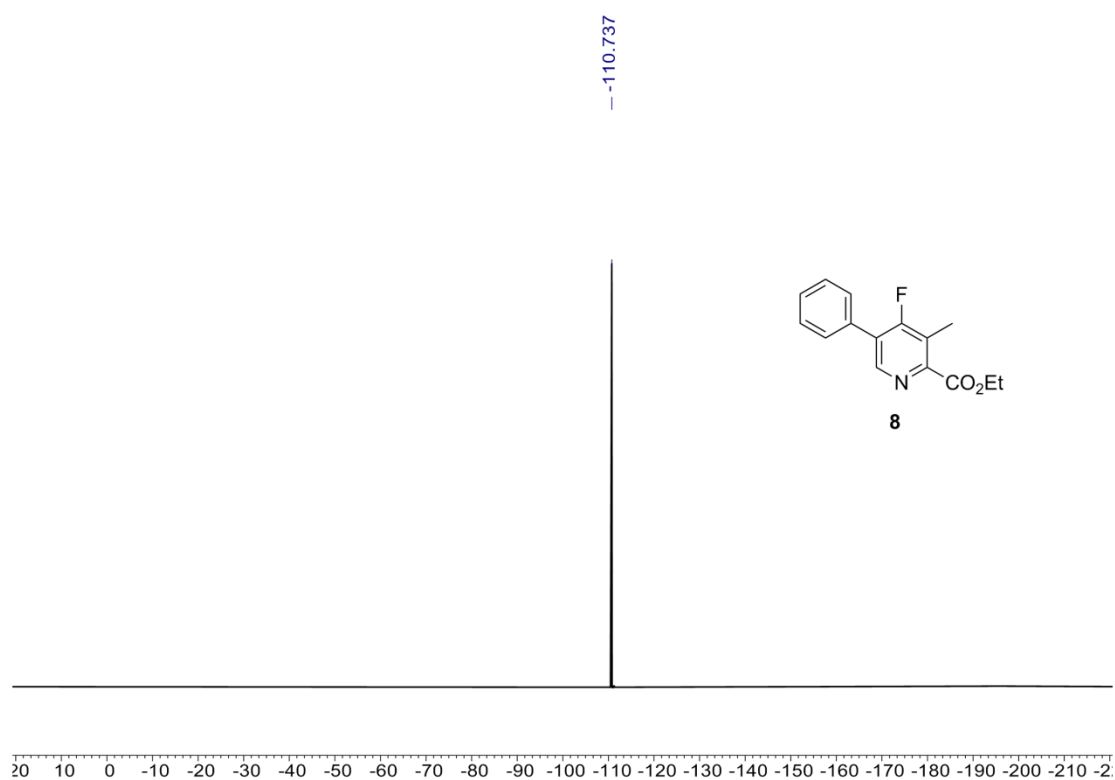

<sup>13</sup>C NMR (100 MHz, CDCl<sub>3</sub>) for **8**

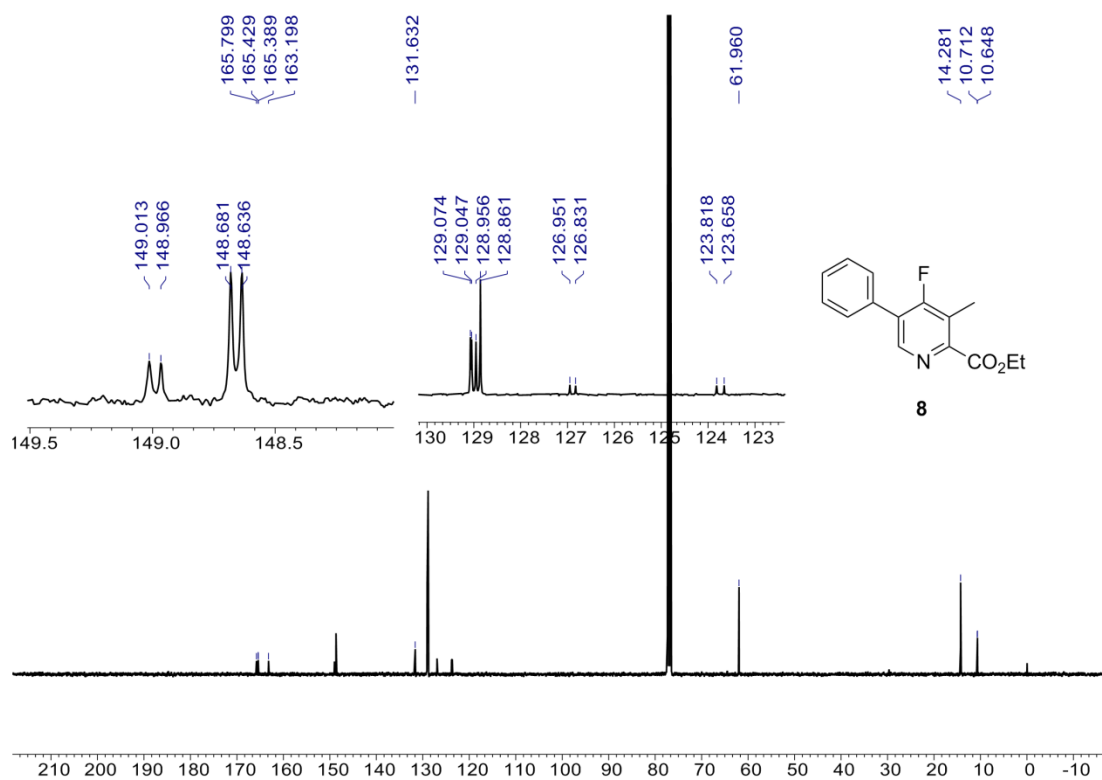

The NOESY spectrum of **8**

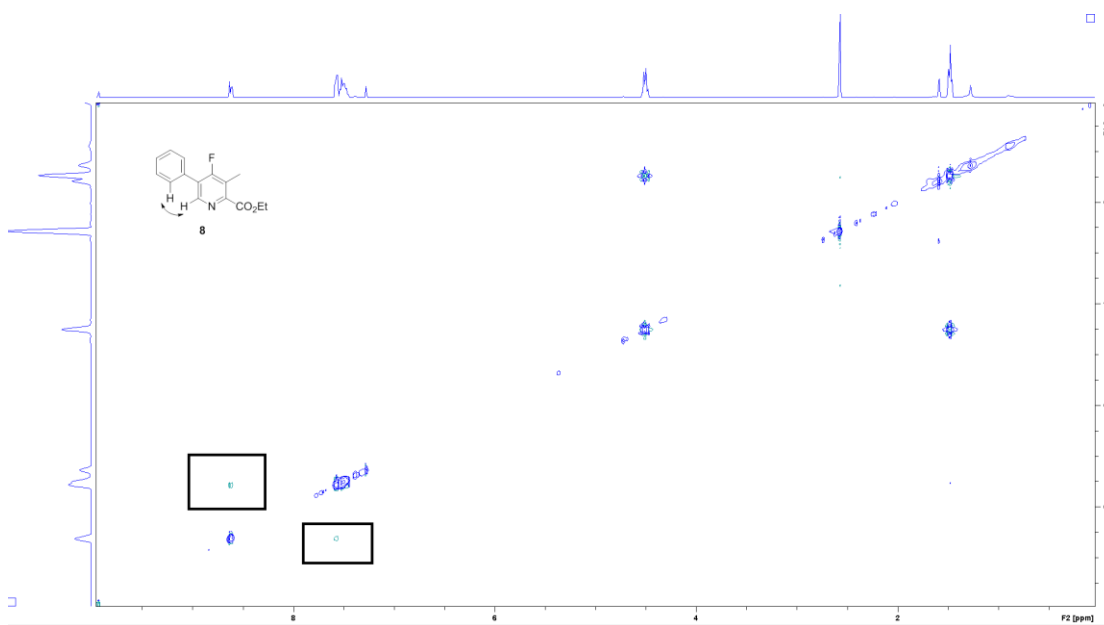

$^1\text{H}$  NMR (400 MHz,  $\text{CDCl}_3$ ) for **9**

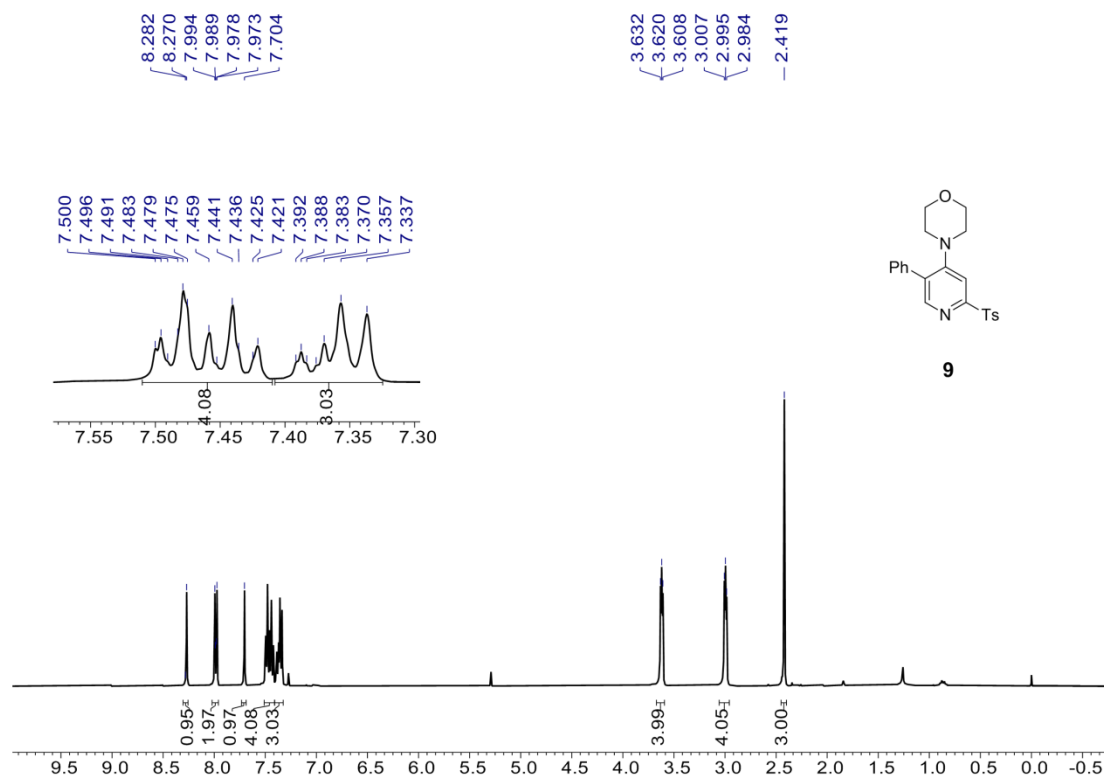

<sup>13</sup>C NMR (100 MHz, CDCl<sub>3</sub>) for **9**

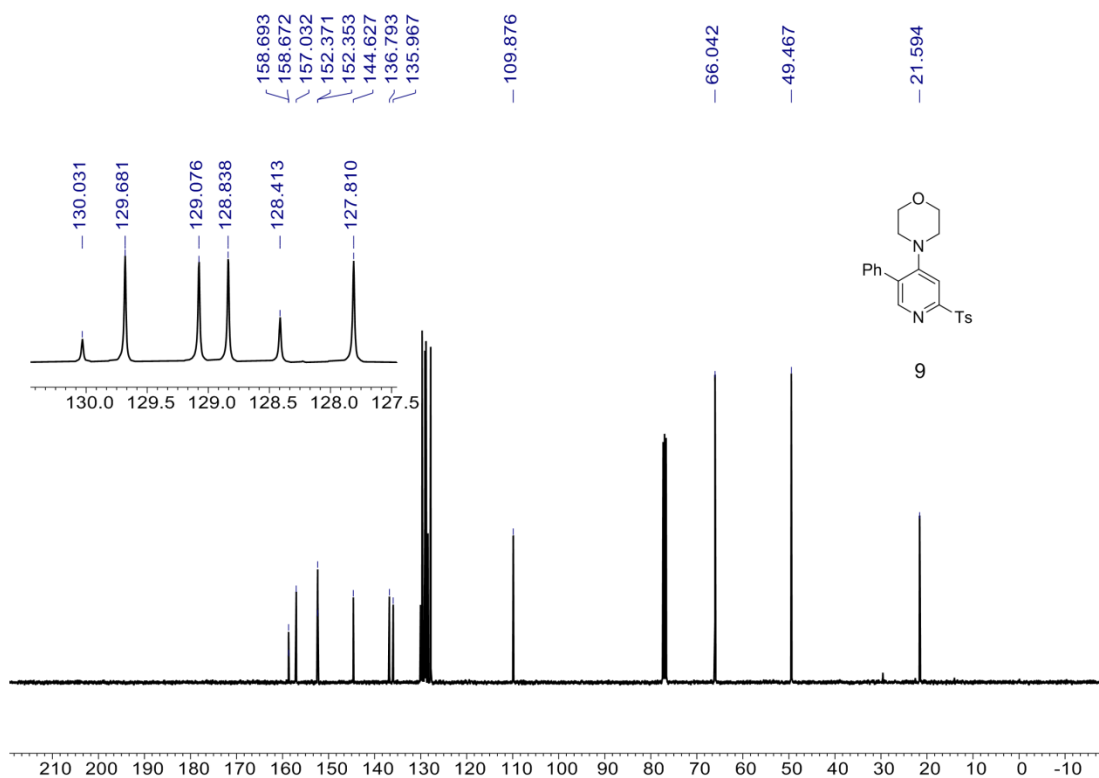

<sup>1</sup>H NMR (400 MHz, CDCl<sub>3</sub>) for **10**

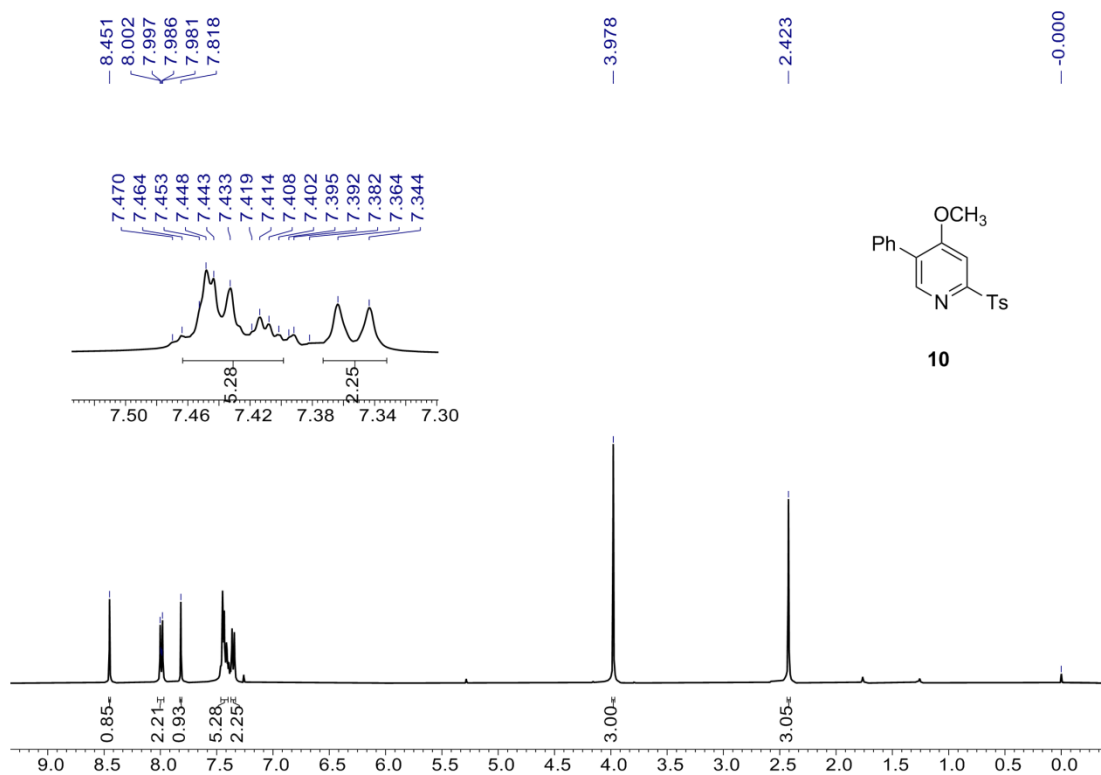

<sup>13</sup>C NMR (100 MHz, CDCl<sub>3</sub>) for **10**

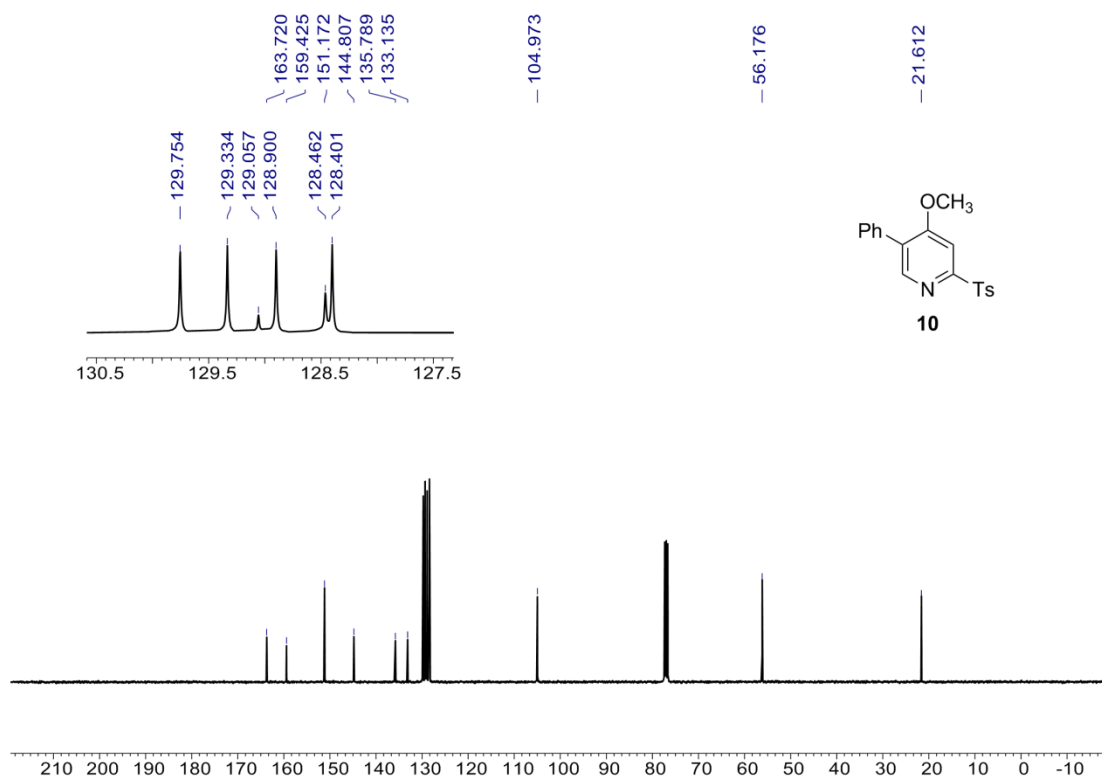

<sup>1</sup>H NMR (400 MHz, CDCl<sub>3</sub>) for **11**

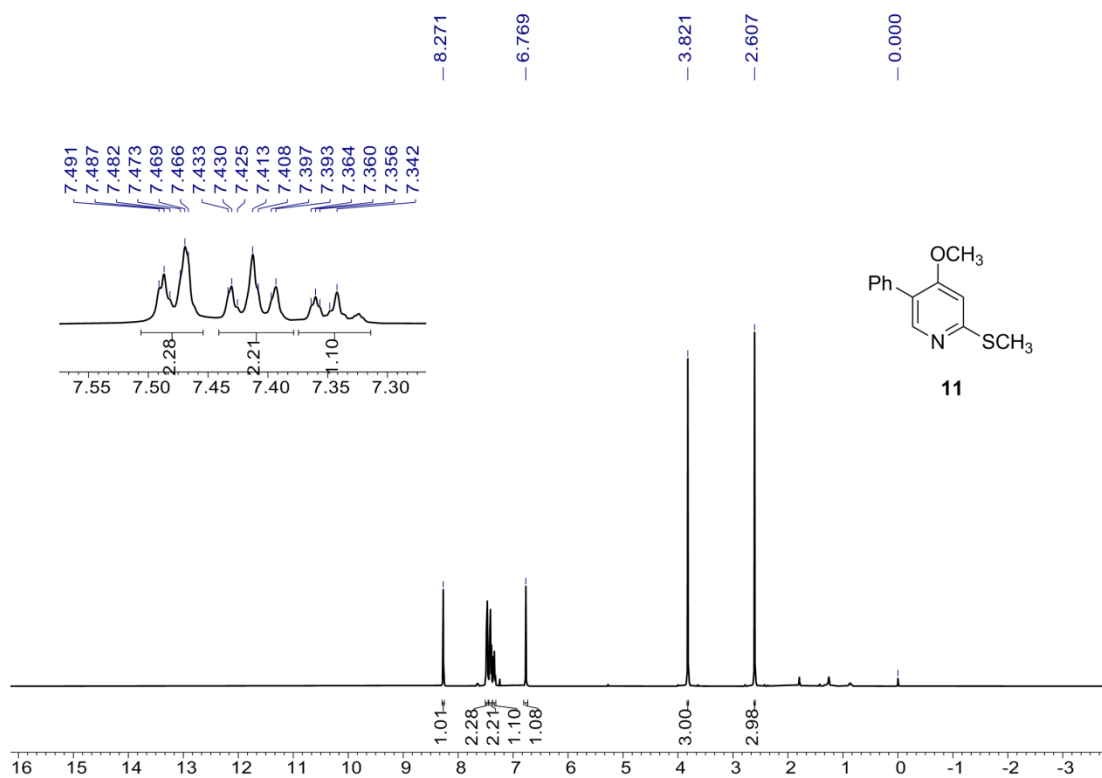

<sup>13</sup>C NMR (100 MHz, CDCl<sub>3</sub>) for **11**

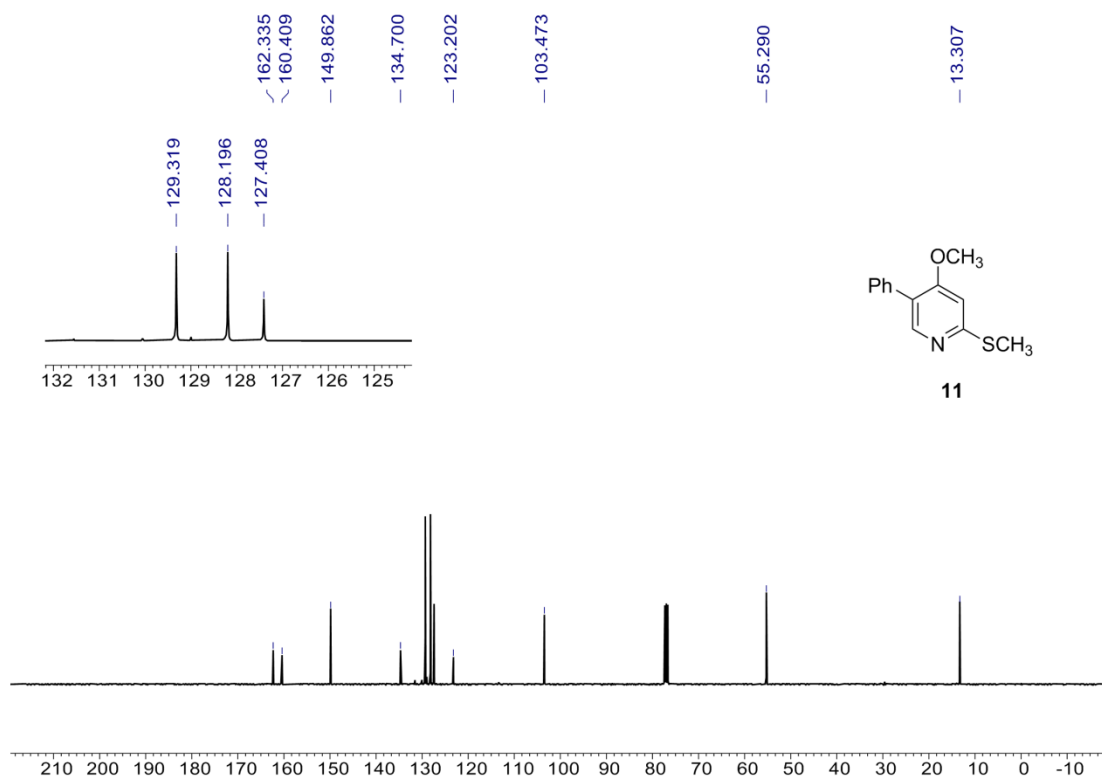

<sup>1</sup>H NMR (400 MHz, DMSO-*d*<sub>6</sub>) for **12**

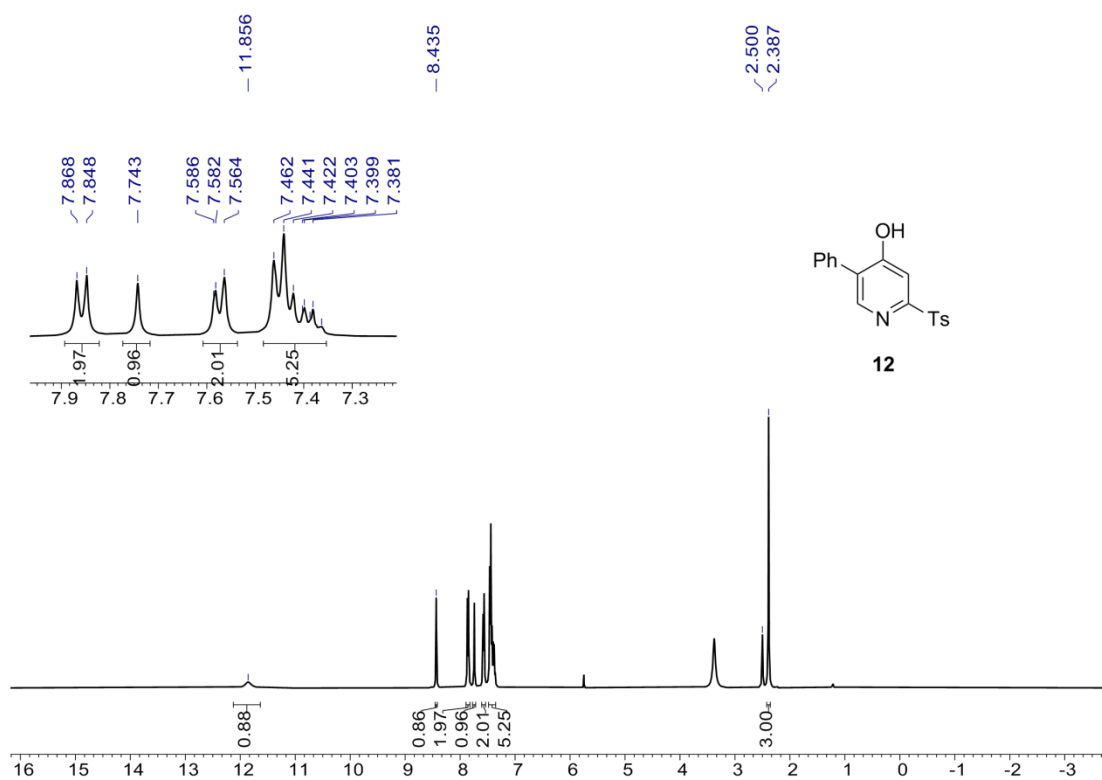

**<sup>13</sup>C NMR (100 MHz DMSO-*d*<sub>6</sub>) for 12**

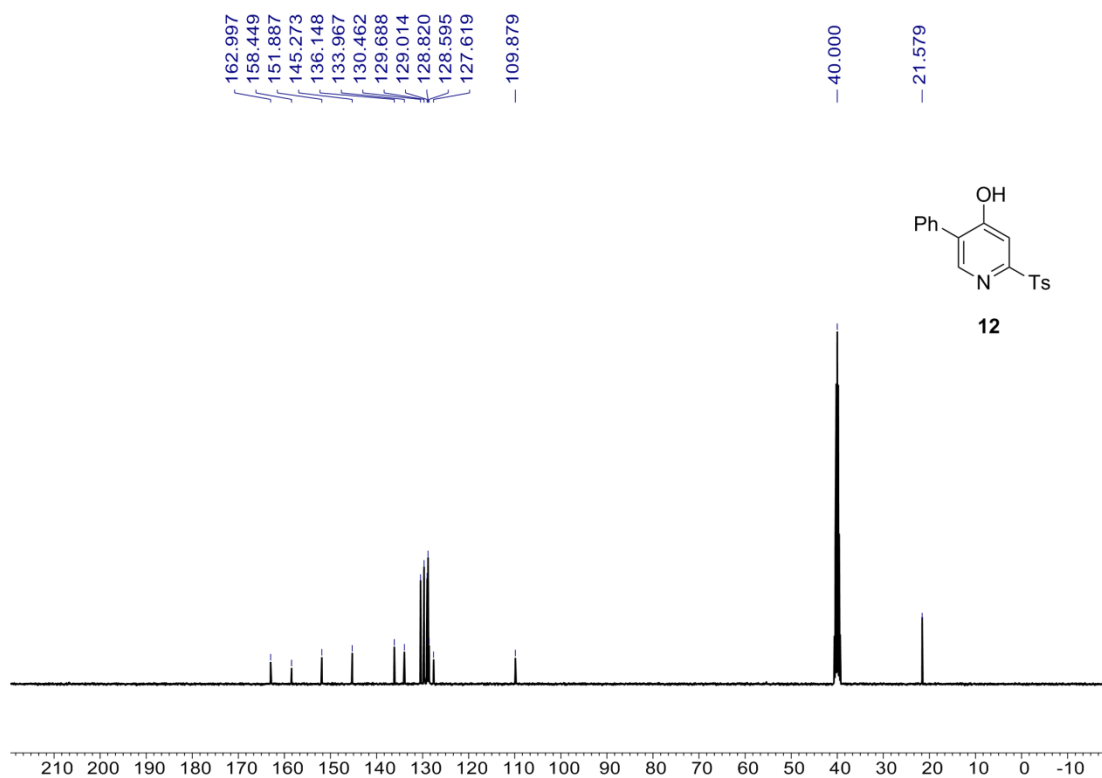

**<sup>1</sup>H NMR (100 MHz, CDCl<sub>3</sub>) for 13**

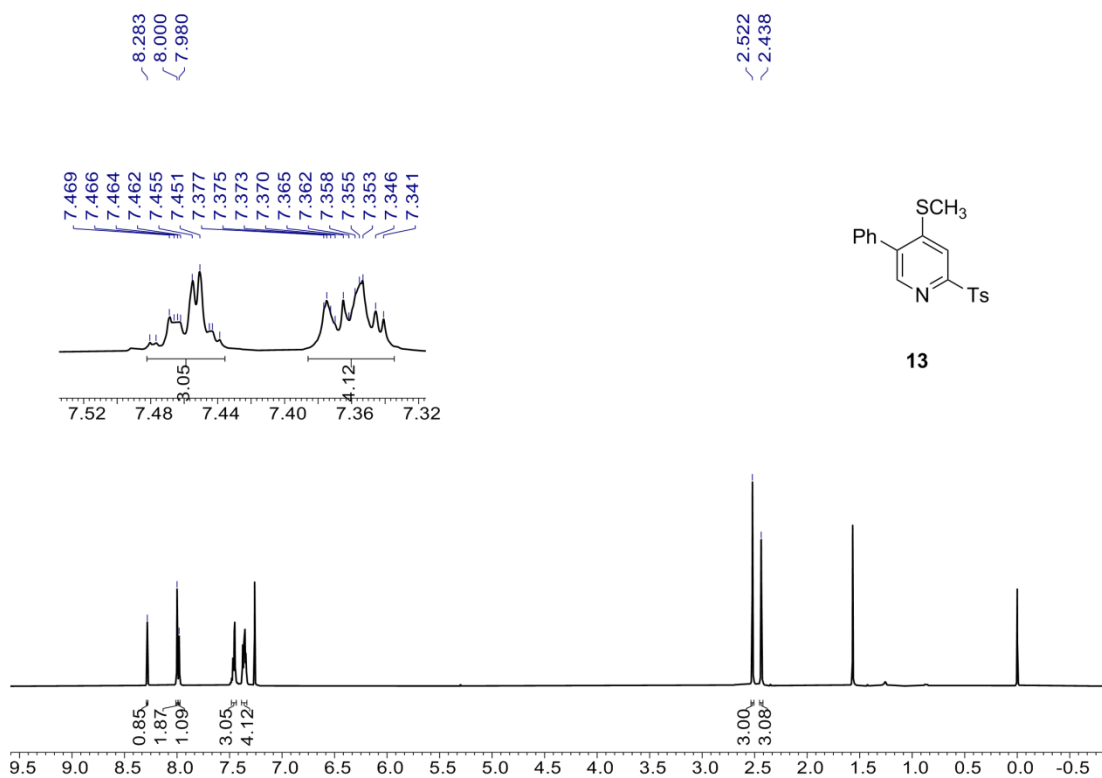

**<sup>13</sup>C NMR (100 MHz, CDCl<sub>3</sub>) for 13**

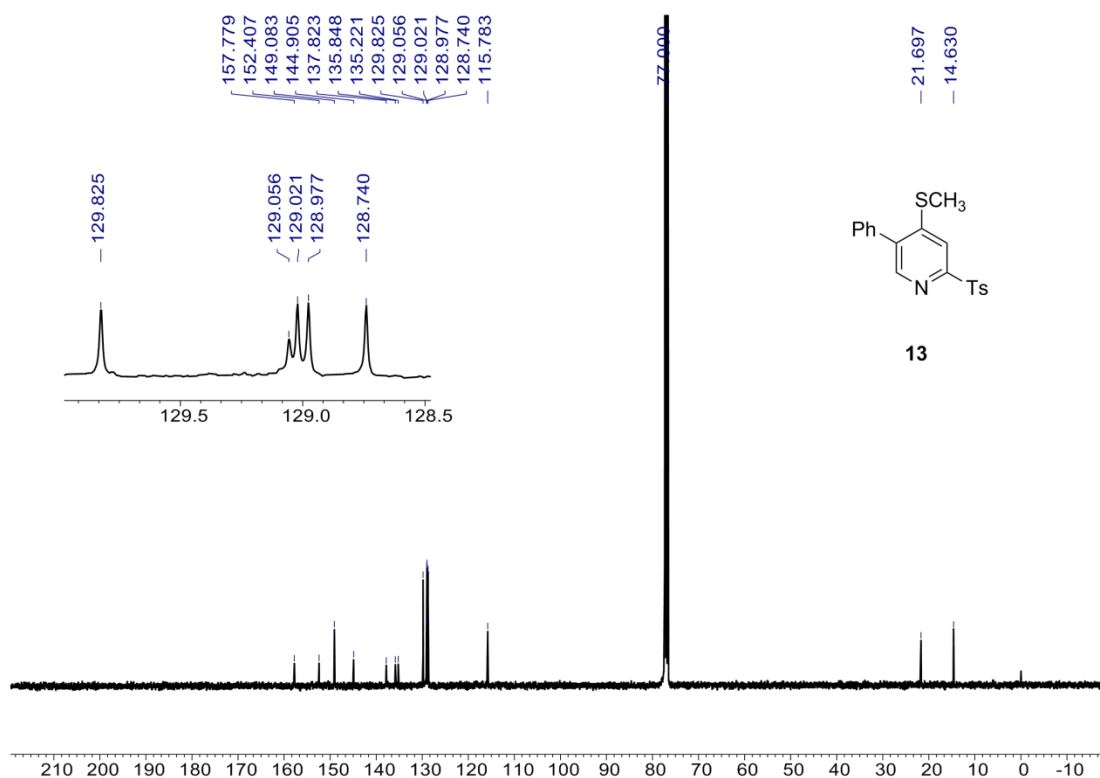

**<sup>1</sup>H NMR (100 MHz, CDCl<sub>3</sub>) for 14**

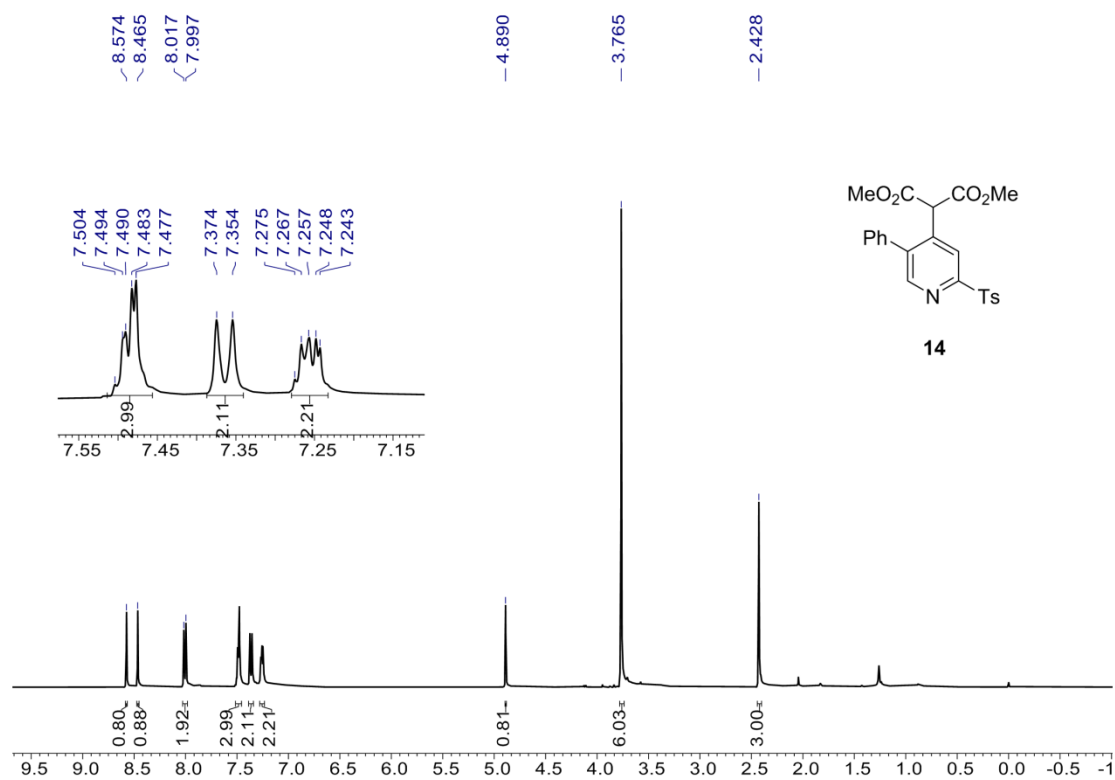



**$^{13}\text{C}$  NMR (100 MHz,  $\text{CDCl}_3$ ) for 14**

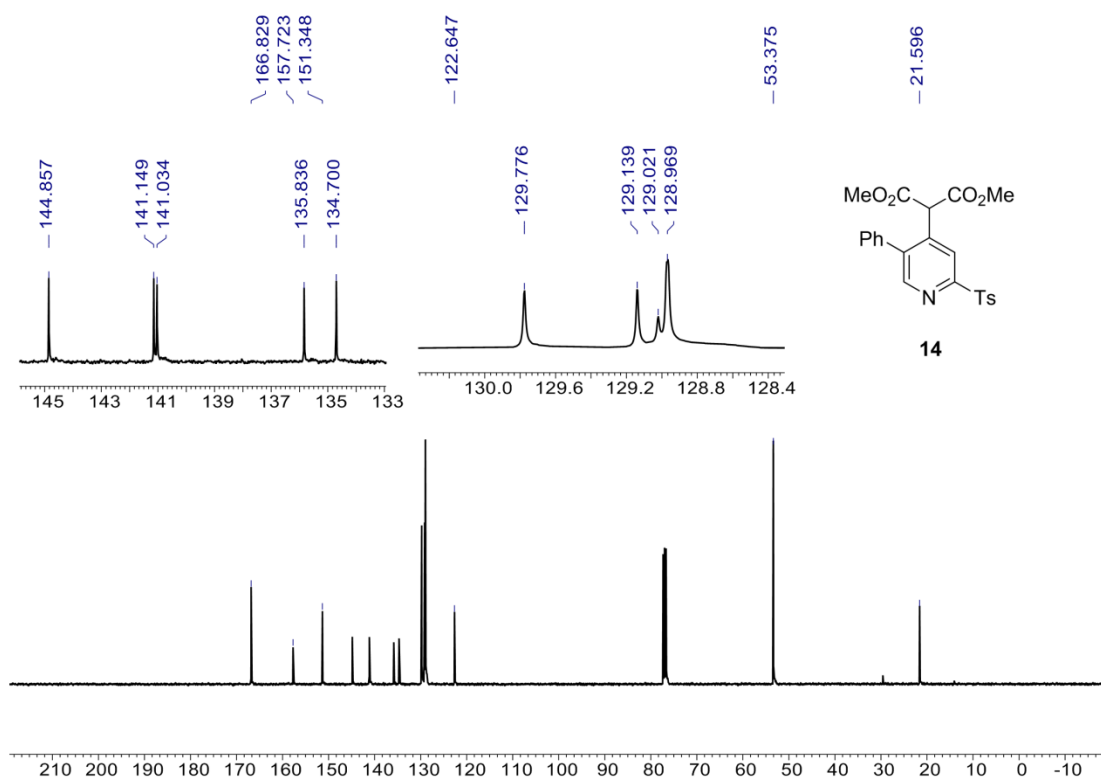

**$^1\text{H}$  NMR (100 MHz,  $\text{CDCl}_3$ ) for 15**

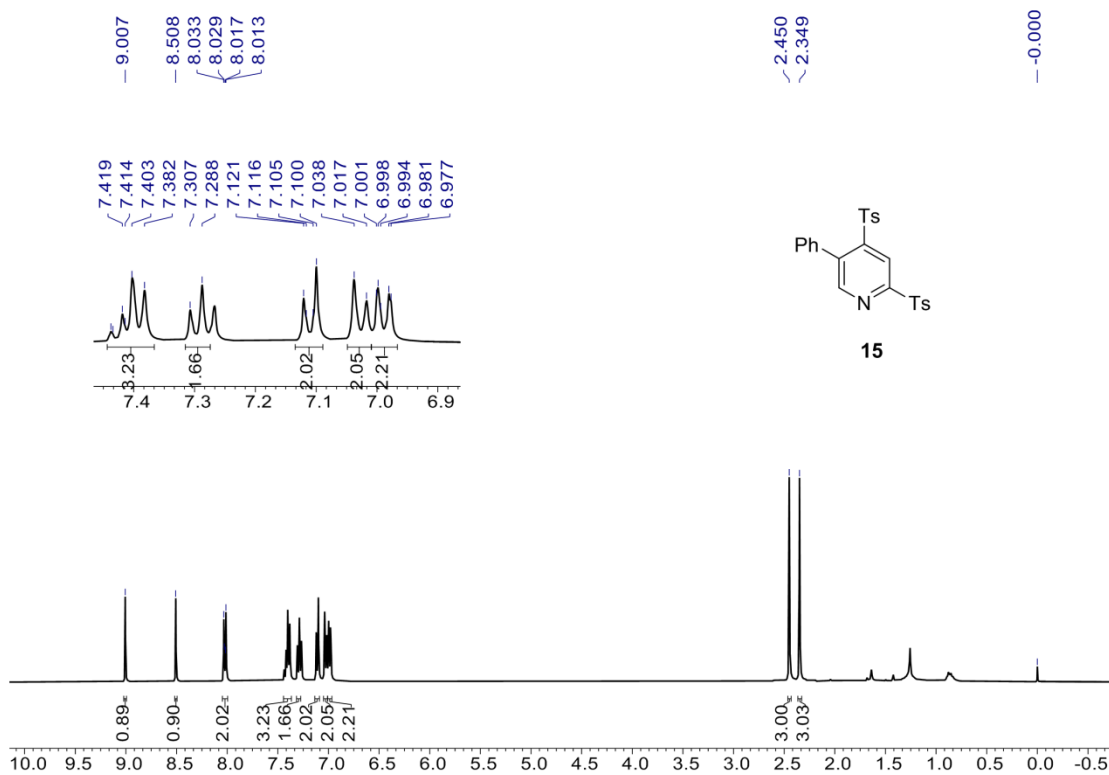

**<sup>13</sup>C NMR (100 MHz, CDCl<sub>3</sub>) for 15**

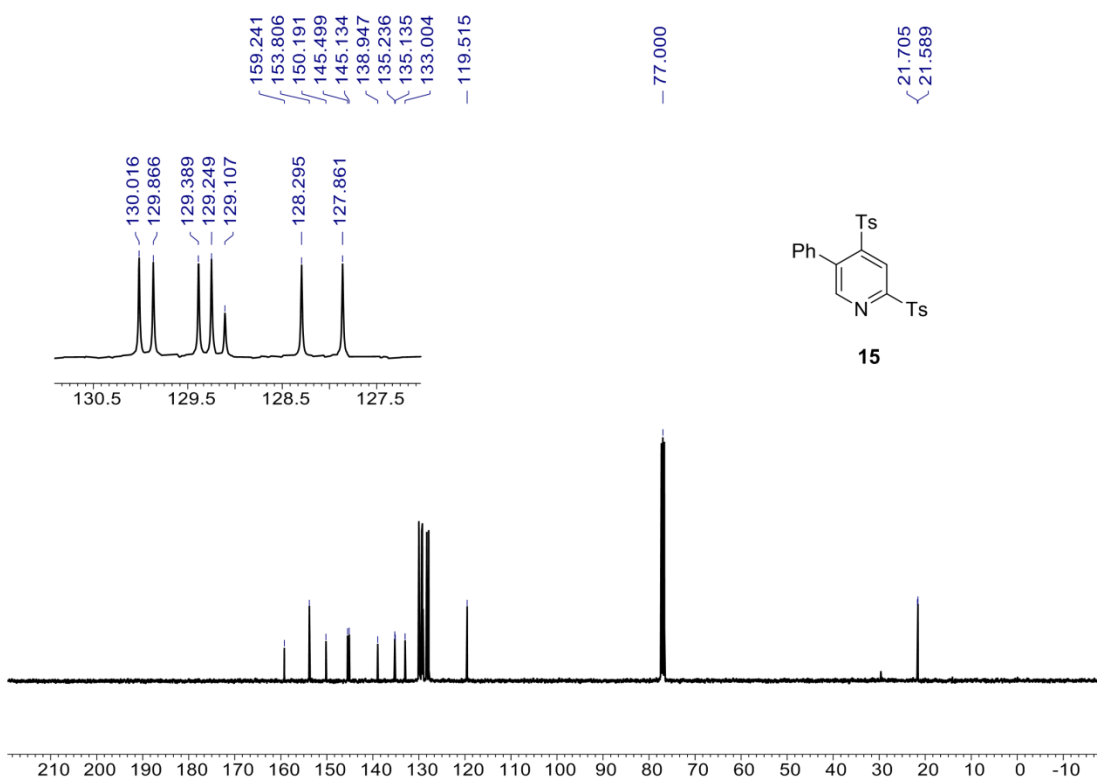

---

## 5.X-ray Crystallographic Data of compound **3k**, **3p**, **4c**

Single-crystal X-ray diffraction data was collected at room temperature on a Oxford Diffraction Gemini R Ultra diffractometer, the X-ray generator using Mo-K $\alpha$  ( $\lambda = 0.71073 \text{ \AA}$ ) radiation with a  $\omega$  scan technique. The crystal structures were solved by direct method of SHELXS-97 and refined by full-matrix least-squares techniques using the SHELXL-97 program. Non-hydrogen atoms were refined anisotropic. CCDC deposition number: 2076659 (**3k**), 2076898 (**3p**), 2076661 (**4c**). Data can be obtained free of charge via [www.ccdc.cam.ac.uk/conts/retrieving.html](http://www.ccdc.cam.ac.uk/conts/retrieving.html) (or from the Cambridge Crystallographic Data Center, 12 Union Road, Cambridge CB21EZ, UK; fax: (+44)1223-336-033; or [deposit@ccdc.cam.ac.uk](mailto:deposit@ccdc.cam.ac.uk)).

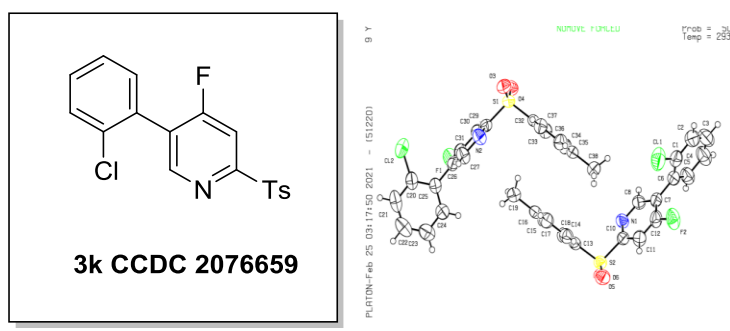

Crystal data and structure refinement for **3k**

---

|                                       |                                                                                                             |
|---------------------------------------|-------------------------------------------------------------------------------------------------------------|
| Empirical formula                     | C <sub>36</sub> H <sub>26</sub> O <sub>4</sub> N <sub>2</sub> F <sub>2</sub> S <sub>2</sub> Cl <sub>2</sub> |
| Formula weight                        | 723.61                                                                                                      |
| Temperature/K                         | 293(2)                                                                                                      |
| Crystal system                        | triclinic                                                                                                   |
| Space group                           | P-1                                                                                                         |
| a/ $\text{\AA}$                       | 8.5995(5)                                                                                                   |
| b/ $\text{\AA}$                       | 11.0868(7)                                                                                                  |
| c/ $\text{\AA}$                       | 18.5904(14)                                                                                                 |
| $\alpha$ / $^\circ$                   | 96.689(6)                                                                                                   |
| $\beta$ / $^\circ$                    | 101.847(6)                                                                                                  |
| $\gamma$ / $^\circ$                   | 99.853(5)                                                                                                   |
| Volume/ $\text{\AA}^3$                | 1687.83(19)                                                                                                 |
| Z                                     | 2                                                                                                           |
| $\rho_{\text{calc}}$ /mm <sup>3</sup> | 1.424                                                                                                       |

|                                                |                                                             |
|------------------------------------------------|-------------------------------------------------------------|
| $m/mm^{-1}$                                    | 3.345                                                       |
| F(000)                                         | 744.0                                                       |
| Crystal size/ $mm^3$                           | $0.09 \times 0.02 \times 0.01$                              |
| Index ranges                                   | $-10 \leq h \leq 9, -13 \leq k \leq 13, -22 \leq l \leq 22$ |
| Reflections collected                          | 11108                                                       |
| Independent reflections                        | 6014[R(int) = 0.0260]                                       |
| Data/restraints/parameters                     | 6014/0/433                                                  |
| Goodness-of-fit on $F^2$                       | 1.034                                                       |
| Final R indexes [ $I \geq 2\sigma(I)$ ]        | $R_1 = 0.0482, wR_2 = 0.1257$                               |
| Final R indexes [all data]                     | $R_1 = 0.0677, wR_2 = 0.1447$                               |
| Largest diff. peak/hole / $e \text{ \AA}^{-3}$ | 0.24/-0.37                                                  |

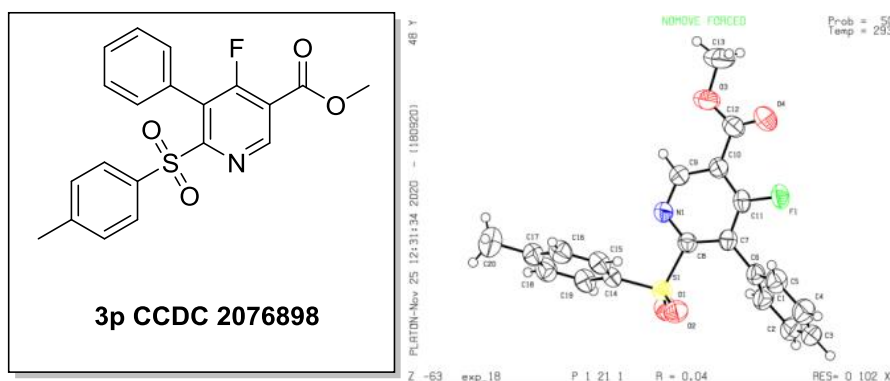

### Crystal data and structure refinement for **3p**

|                   |                      |
|-------------------|----------------------|
| Empirical formula | $C_{20}H_{16}NO_4SF$ |
| Formula weight    | 385.40               |
| Temperature/K     | 293(2)               |
| Crystal system    | monoclinic           |
| Space group       | $P2_1$               |
| $a/\text{\AA}$    | 6.0579(2)            |
| $b/\text{\AA}$    | 15.5439(5)           |
| $c/\text{\AA}$    | 9.8183(3)            |
| $\alpha/^\circ$   | 90.00                |
| $\beta/^\circ$    | 92.620(3)            |

|                                               |                                                           |
|-----------------------------------------------|-----------------------------------------------------------|
| $\gamma/^\circ$                               | 90.00                                                     |
| Volume/ $\text{\AA}^3$                        | 923.56(5)                                                 |
| Z                                             | 2                                                         |
| $\rho_{\text{calc}}/\text{mg}/\text{mm}^3$    | 1.386                                                     |
| $\text{m}/\text{mm}^{-1}$                     | 1.877                                                     |
| F(000)                                        | 400.0                                                     |
| Crystal size/ $\text{mm}^3$                   | $0.26 \times 0.20 \times 0.09$                            |
| Index ranges                                  | $-7 \leq h \leq 7, -13 \leq k \leq 18, -11 \leq l \leq 8$ |
| Reflections collected                         | 3793                                                      |
| Independent reflections                       | 2576[R(int) = 0.0185]                                     |
| Data/restraints/parameters                    | 2576/1/244                                                |
| Goodness-of-fit on $F^2$                      | 1.065                                                     |
| Final R indexes [ $I \geq 2\sigma(I)$ ]       | $R_1 = 0.0350, wR_2 = 0.0918$                             |
| Final R indexes [all data]                    | $R_1 = 0.0365, wR_2 = 0.0935$                             |
| Largest diff. peak/hole / $e \text{\AA}^{-3}$ | 0.15/-0.24                                                |
| Flack parameter                               | 0.029(18)                                                 |

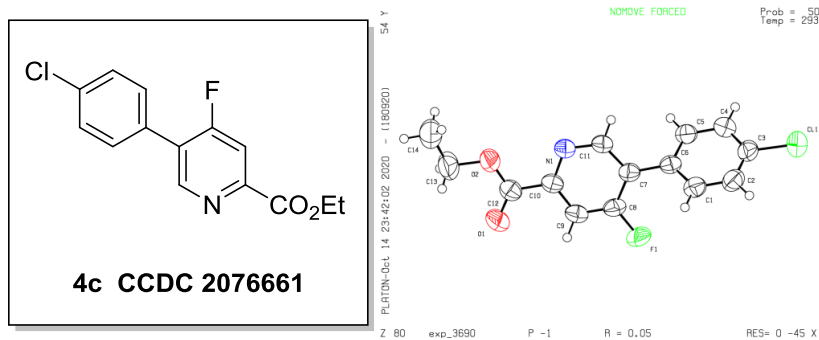

#### Crystal data and structure refinement for **4c**

|                   |                                                   |
|-------------------|---------------------------------------------------|
| Empirical formula | $\text{C}_{14}\text{H}_{11}\text{NO}_2\text{ClF}$ |
| Formula weight    | 279.69                                            |
| Temperature/K     | 293(2)                                            |
| Crystal system    | triclinic                                         |
| Space group       | P-1                                               |
| $a/\text{\AA}$    | 7.3135(7)                                         |
| $b/\text{\AA}$    | 7.6484(6)                                         |

---

|                                             |                                                   |
|---------------------------------------------|---------------------------------------------------|
| c/Å                                         | 12.3996(11)                                       |
| $\alpha$ /°                                 | 103.627(7)                                        |
| $\beta$ /°                                  | 97.874(8)                                         |
| $\gamma$ /°                                 | 98.131(7)                                         |
| Volume/Å <sup>3</sup>                       | 656.75(10)                                        |
| Z                                           | 2                                                 |
| $\rho_{\text{calc}}$ /mg/mm <sup>3</sup>    | 1.414                                             |
| m/mm <sup>-1</sup>                          | 2.675                                             |
| F(000)                                      | 288.0                                             |
| Crystal size/mm <sup>3</sup>                | 0.22 × 0.16 × 0.13                                |
| 2 $\theta$ range for data collection        | 7.46 to 134.02°                                   |
| Index ranges                                | -8 ≤ h ≤ 8, -9 ≤ k ≤ 6, -14 ≤ l ≤ 14              |
| Reflections collected                       | 3825                                              |
| Independent reflections                     | 2312[R(int) = 0.0210]                             |
| Data/restraints/parameters                  | 2312/0/174                                        |
| Goodness-of-fit on F <sup>2</sup>           | 1.052                                             |
| Final R indexes [ $I \geq 2\sigma(I)$ ]     | R <sub>1</sub> = 0.0507, wR <sub>2</sub> = 0.1399 |
| Final R indexes [all data]                  | R <sub>1</sub> = 0.0603, wR <sub>2</sub> = 0.1547 |
| Largest diff. peak/hole / e Å <sup>-3</sup> | 0.22/-0.21                                        |

---
